# Supplementary material
Source: publisher figshare collection journal article supplement (https://acs.figshare.com/ndownloader/files/15078032)

*Supporting Information for*

**Chemoselective Synthesis of  $\alpha$ -Amino- $\alpha$ -cyanophosphonates by  
Reductive Gem-Cyanation-Phosphonylation of Secondary Amides**

Ting-Ting Chen, Ai-E Wang,<sup>\*,a,b</sup> and Pei-Qiang Huang<sup>\*,a,b</sup>

<sup>a</sup> *Department of Chemistry and Fujian Provincial Key Laboratory of Chemical Biology, College of  
Chemistry and Chemical Engineering, Xiamen University, Xiamen 361005, Fujian, China*

<sup>b</sup> *State Key Laboratory of Applied Organic Chemistry Lanzhou University, Lanzhou 730000,  
China.*

E-mail: [aiewang@xmu.edu.cn](mailto:aiewang@xmu.edu.cn)

E-mail: [pghuang@xmu.edu.cn](mailto:pghuang@xmu.edu.cn)

## Contents

|                                                                                                        |         |
|--------------------------------------------------------------------------------------------------------|---------|
| 1. General Information.....                                                                            | S2      |
| 2. Preparation of Amides.....                                                                          | S3-S8   |
| 3. Table S1. Reaction Optimization on Reductive Geminal Cyanation/Phosphonylation.....                 | S9      |
| 4. Table S2. Base Optimization in Amide Activation.....                                                | S10     |
| 5. Transformation of Amides into $\alpha$ -Amino- $\alpha$ -cyanophosphonates.....                     | S11-S31 |
| 6. Gram-scale Synthesis of <b>1z</b> .....                                                             | S32     |
| 7. References.....                                                                                     | S33     |
| 8. <sup>1</sup> H/ <sup>13</sup> C/ <sup>31</sup> P/ <sup>19</sup> F NMR Spectra of New Compounds..... | S34-S85 |

## 1. General Information

Unless otherwise stated, reactions were performed in oven-dried glassware under a nitrogen atmosphere using standard Schlenk techniques. Commercially available reagents were purchased from Enery, TCI, Acros, Sigma-Aldrich, J&K, Aladdin, Sinoreagent and used as received unless otherwise noted. Dichloromethane was distilled over calcium hydride under a nitrogen atmosphere. Silica gel (300-400 mesh) was used for flash column chromatography, eluting with ethyl acetate (EtOAc)/hexane mixture. Trifluoromethanesulfonic anhydride (Tf<sub>2</sub>O) was distilled over phosphorous pentoxide and stored for no more than one week before redistilling.

Melting points were determined on a Büchi M560 Automatic Melting Point apparatus. Infrared spectra were measured with a Nicolet Avatar 330 FT-IR spectrometer using film KBr pellet techniques.). NMR spectra were recorded in CDCl<sub>3</sub> on a Bruker Av 400 or 500 spectrometer (400 MHz or 500 MHz for <sup>1</sup>H NMR, 101 MHz or 125 MHz for <sup>13</sup>C NMR and 202 MHz for <sup>31</sup>P NMR). Chemical shifts (δ) are reported in ppm and referenced to internal standard (Me<sub>4</sub>Si, 0 ppm for <sup>1</sup>H NMR), solvent signal (CDCl<sub>3</sub>, 77.0 ppm for <sup>13</sup>C NMR) and external standard (85% H<sub>3</sub>PO<sub>4</sub>, 0 ppm for <sup>31</sup>P NMR), respectively. HRMS spectra were recorded on an ESI-TOF mass spectrometer.

## 2. Preparation of Amides

### General Procedure<sup>[1]</sup>

To a solution of the amine (5.00 mmol) and Et<sub>3</sub>N (6.00 mmol) in DCM (0.10 M), was added the corresponding acyl chloride (5.00 mmol) dropwise at 0 °C. The resulting reaction mixture was allowed to warm to room temperature and stirred for 6 h. Saturated aqueous NaHCO<sub>3</sub> solution was then added and the biphasic system was separated. The aqueous phase was extracted with DCM (3 × 20 mL) and the organic phases were combined and dried over anhydrous MgSO<sub>4</sub>, filtered and concentrated under reduced pressure. The residue was purified by flash column chromatography on silica gel (elution: hexane/EtOAc) to afford the desired amide.

### *N*-Isopropylbenzamide (2a)<sup>[2]</sup>

98% yield. All analytical data were in good accordance with reported data.

### *N*-Isopropyl-4-methylbenzamide (2b)<sup>[3]</sup>

95% yield. All analytical data were in good accordance with reported data.

### *N*-Isopropyl-2-methylbenzamide (2c)<sup>[4]</sup>

92% yield. All analytical data were in good accordance with reported data.

### *N*-Isopropyl-4-methoxybenzamide (2d)<sup>[5]</sup>

92% yield. All analytical data were in good accordance with reported data.

### 4-(Isopropylcarbamoyl)phenyl acetate (2e)

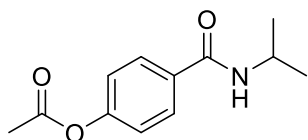

92% yield. White solid. MP: 141–142 °C. IR (film): 3314, 2976, 1760, 1632, 1538, 1191, 914, 749 cm<sup>-1</sup>; <sup>1</sup>H NMR (400 MHz, CDCl<sub>3</sub>) δ 7.87–7.69 (m, 2H), 7.20–7.01 (m, 2H), 6.37–6.09 (m, 1H), 4.33–4.16 (m, 1H), 2.34–2.27 (m, 3H), 1.28–1.18 (m, 6H) ppm; <sup>13</sup>C NMR (101 MHz, CDCl<sub>3</sub>) δ 169.0, 165.8, 152.8, 132.5, 128.2, 121.5, 41.9,

22.6, 21.0 ppm; HRMS (ESI) calcd for  $C_{12}H_{15}NO_3Na$   $[M+Na^+]$ : 244.0939, found: 244.0945.

**4-Chloro-*N*-isopropylbenzamide (2f)**<sup>[6]</sup>

96% yield. All analytical data were in good accordance with reported data.

**3,4-Dichloro-*N*-isopropylbenzamide (2g)**

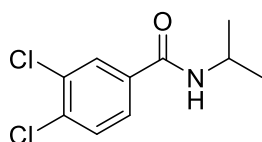

95% yield. White solid. MP: 128–129 °C. IR (film): 3283, 2975, 1630, 1544, 1453, 1365, 1131, 899, 705  $cm^{-1}$ ;  $^1H$  NMR (400 MHz,  $CDCl_3$ )  $\delta$  7.88–7.80 (m, 1H), 7.62–7.54 (m, 1H), 7.49–7.43 (m, 1H), 6.30 (d,  $J$  = 7.6 Hz, 1H), 4.38–4.13 (m, 1H), 1.33–1.18 (m, 6H) ppm;  $^{13}C$  NMR (101 MHz,  $CDCl_3$ )  $\delta$  164.5, 135.5, 134.7, 132.8, 130.4, 129.1, 126.1, 42.2, 22.6 ppm; HRMS (ESI) calcd for  $C_{10}H_{11}Cl_2NONa$   $[M+Na^+]$ : 254.0104, found: 254.0101.

**2-Chloro-*N*-isopropylbenzamide (2h)**<sup>[7]</sup>

97% yield. All analytical data were in good accordance with reported data.

**3-Bromo-*N*-isopropylbenzamide (2i)**

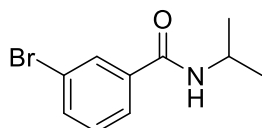

97% yield. White solid. MP: 83–84 °C. IR (film): 3293, 2973, 1634, 1540, 1276, 1173, 748, 706  $cm^{-1}$ ;  $^1H$  NMR (400 MHz,  $CDCl_3$ )  $\delta$  7.95–7.84 (m, 1H), 7.81–7.62 (m, 1H), 7.62–7.47 (m, 1H), 7.29–7.20 (m, 1H), 6.43 (s, 1H), 4.40–3.91 (m, 1H), 1.27–1.21 (m, 6H) ppm;  $^{13}C$  NMR (101 MHz,  $CDCl_3$ )  $\delta$  165.3, 136.9, 134.0, 130.0, 129.9, 125.4, 122.5, 42.0, 22.6 ppm; HRMS (ESI) calcd for  $C_{10}H_{12}BrNONa$   $[M+Na^+]$ : 263.9989, found: 263.9968.

***N*-Isopropyl-4-(trifluoromethyl)benzamide (2j)**<sup>[8]</sup>

92% yield. All analytical data were in good accordance with reported data.

***N*-Isopropyl-4-nitrobenzamide (2k)**<sup>[9]</sup>

92% yield. All analytical data were in good accordance with reported data.

#### 4-Cyano-*N*-isopropylbenzamide (2l)

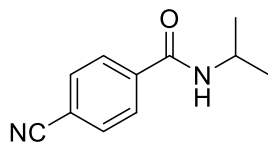

91% yield. White solid. MP: 153–154 °C. IR (film): 3308, 2974, 1633, 1537, 1296, 1160, 856, 684, 569  $\text{cm}^{-1}$ ;  $^1\text{H}$  NMR (400 MHz,  $\text{CDCl}_3$ )  $\delta$  7.89–7.81 (m, 2H), 7.75–7.69 (m, 2H), 6.06 (s, 1H), 4.38–4.18 (m, 1H), 1.33–1.21 (m, 6H) ppm;  $^{13}\text{C}$  NMR (101 MHz,  $\text{CDCl}_3$ )  $\delta$  164.8, 138.8, 132.1, 127.6, 117.9, 114.4, 42.2, 22.4 ppm; HRMS (ESI) calcd for  $\text{C}_{11}\text{H}_{13}\text{N}_2\text{O}$  [ $\text{M}+\text{H}^+$ ]: 189.1017, found: 189.1023.

#### (*E*)-*N*-Isopropyl-4-(phenyldiazenyl)benzamide (2m)

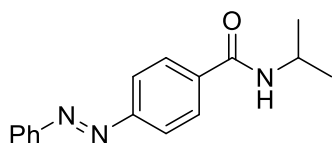

91% yield. White solid. MP: 193–194 °C. IR (film): 3300, 2972, 1629, 1534, 1290, 859, 691  $\text{cm}^{-1}$ ;  $^1\text{H}$  NMR (500 MHz,  $\text{CDCl}_3$ )  $\delta$  7.99–7.86 (m, 6H), 7.58–7.43 (m, 3H), 6.17 (d,  $J = 7.5$  Hz, 1H), 4.40–4.21 (m, 1H), 1.35–1.24 (m, 6H) ppm;  $^{13}\text{C}$  NMR (125 MHz,  $\text{CDCl}_3$ )  $\delta$  166.0, 154.0, 152.5, 136.7, 131.5, 129.1, 127.8, 123.0, 122.8, 42.1, 22.8 ppm; HRMS (ESI) calcd for  $\text{C}_{16}\text{H}_{17}\text{N}_3\text{ONa}$  [ $\text{M}+\text{Na}^+$ ]: 290.1264, found: 290.1261.

#### 4-Acetyl-*N*-isopropylbenzamide (2n)

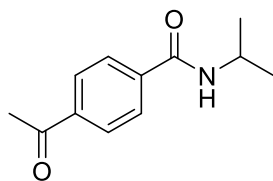

92% yield. White solid. MP: 163–164 °C. IR (film): 3317, 2977, 1682, 1537, 1362, 1141, 852, 667  $\text{cm}^{-1}$ ;  $^1\text{H}$  NMR (500 MHz,  $\text{CDCl}_3$ )  $\delta$  8.07–7.94 (m, 2H), 7.87–7.79 (m, 2H), 6.04 (s, 1H), 4.38–4.21 (m, 1H), 2.63 (s, 3H), 1.32–1.26 (m, 6H) ppm;  $^{13}\text{C}$  NMR (125 MHz,  $\text{CDCl}_3$ )  $\delta$  197.4, 165.7, 139.0, 138.9, 128.5, 127.1, 42.2, 26.8, 22.8 ppm; HRMS (ESI) calcd for  $\text{C}_{12}\text{H}_{15}\text{NO}_2\text{Na}$  [ $\text{M}+\text{Na}^+$ ]: 228.0995, found: 228.0985.

#### Methyl 4-(isopropylcarbamoyl)benzoate (2o)<sup>[10]</sup>

93% yield. All analytical data were in good accordance with reported data.

#### *N*-Isopropyl-2-naphthamide (2p)<sup>[6]</sup>

92% yield. All analytical data were in good accordance with reported data.

***N*-Cyclohexylbenzamide (2q)<sup>[2]</sup>**

90% yield. All analytical data were in good accordance with reported data.

***N*-Cyclopropylbenzamide (2r)<sup>[11]</sup>**

90% yield. All analytical data were in good accordance with reported data.

***(S)*-*N*-(1-Methoxy-3-methylbutan-2-yl)benzamide (2s)**

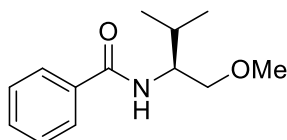

Following the General Procedure, (*S*)-*N*-(1-hydroxy-3-methylbutan-2-yl)benzamide was prepared, which without purification was subjected to methylation:<sup>[12]</sup> To the solution of the above amide (5.00 mmol) in THF (0.10 M) was added NaH (60% dispersion in mineral oil, 600 mg, 15.0 mmol) at 0 °C and stirred for 30 min. Then MeI (93.3  $\mu$ L, 15.0 mmol) was added dropwise and the reaction mixture was allowed warm to room temperature and stirred for 10 h. Saturated aqueous NH<sub>4</sub>Cl solution was then added and the aqueous phase was extracted with EtOAc (3  $\times$  20 mL). The organic phases were combined and dried over anhydrous MgSO<sub>4</sub>, filtered and concentrated under reduced pressure. The residue was purified by flash column chromatography on silica gel (elution: hexane/EtOAc = 1:2) to afford the desired amide. 85% yield for 2 steps. White solid. MP: 76–77 °C. IR (film): 3307, 2921, 1653, 1540, 1322, 1114, 694 cm<sup>-1</sup>; <sup>1</sup>H NMR (400 MHz, CDCl<sub>3</sub>)  $\delta$  7.82–7.75 (m, 2H), 7.52–7.38 (m, 3H), 6.46 (d, *J* = 9.3 Hz, 1H), 4.13–3.99 (m, 1H), 3.65–3.54 (m, 1H), 3.50–3.40 (m, 1H), 3.34 (s, 3H), 2.08–1.88 (m, 1H), 1.04–0.93 (m, 6H) ppm; <sup>13</sup>C NMR (101 MHz, CDCl<sub>3</sub>)  $\delta$  167.1, 134.8, 131.2, 128.4, 126.8, 72.5, 59.0, 54.4, 29.6, 19.5, 19.1 ppm; HRMS (ESI) calcd for C<sub>13</sub>H<sub>19</sub>NO<sub>2</sub>Na [M+Na<sup>+</sup>]: 244.1308, found: 244.1311.

***N*-Ethylbenzamide (2t)<sup>[13]</sup>**

90% yield. All analytical data were in good accordance with reported data.

***N*-(3-Methoxypropyl)benzamide (2u)<sup>[14]</sup>**

Following the General Procedure, *N*-(3-hydroxypropyl)benzamide was prepared,

which without purification was subjected to a methylation:<sup>[12]</sup> To the solution of the above amide (5.00 mmol) in THF (0.10 M) was added NaH (60% dispersion in mineral oil, 600 mg, 15.0 mmol) at 0 °C and stirred for 30 min. Then MeI (93.3  $\mu$ L, 15.0 mmol) was added dropwise and the reaction mixture was allowed warm to room temperature and stirred for 10 h. Saturated aqueous NH<sub>4</sub>Cl solution was then added and the aqueous phase was extracted with EtOAc (3  $\times$  20 mL). The organic phases were combined and dried over anhydrous MgSO<sub>4</sub>, filtered and concentrated under reduced pressure. The residue was purified by flash column chromatography on silica gel (elution: hexane/EtOAc = 1:2) to afford the desired amide. 82% yield for 2 steps. All analytical data were in good accordance with reported data.

**Methyl 3-benzamidopropanoate (2v)**<sup>[15]</sup>

90% yield. All analytical data were in good accordance with reported data.

**N-(2-Chloroethyl)benzamide (2w)**<sup>[16]</sup>

89% yield. All analytical data were in good accordance with reported data.

**N-(2-Bromoethyl)benzamide (2x)**<sup>[17]</sup>

93% yield. All analytical data were in good accordance with reported data.

**N-(4-Bromobutyl)benzamide (2y)**<sup>[18]</sup>

Following the General Procedure, *N*-(4-hydroxybutyl)benzamide was prepared, which without purification was subjected to bromination:<sup>[19]</sup> To the solution of the above amide (5.00 mmol) and carbon tetrabromide (1.99 g, 6.00 mmol) in DCM (0.20 M) was added triphenylphosphine (1.83 g, 6.00 mmol) over 30 minutes at 0 °C. The reaction was allowed to warm to room temperature and subsequently heated to 50 °C and stirred for 6 hours. The reaction was cooled to room temperature, diluted with ethyl acetate, and washed with saturated Na<sub>2</sub>S<sub>2</sub>O<sub>3</sub>. The aqueous phase was extracted with EtOAc (3  $\times$  20 mL). The organic phases were combined and dried over anhydrous MgSO<sub>4</sub>, filtered and concentrated under reduced pressure. The residue was purified by flash column chromatography on silica gel (elution: hexane/EtOAc = 1:2) to afford the desired amide. 80% yield for 2 steps. All analytical data were in good accordance with reported data.

**N-Benzylbenzamide (2z)**<sup>[14]</sup>

90% yield. All analytical data were in good accordance with reported data.

***N*-Allylbenzamide (2aa)**<sup>[20]</sup>

90% yield. All analytical data were in good accordance with reported data.

***N*-(Tert-butyl)benzamide (2ab)**<sup>[21]</sup>

90% yield. All analytical data were in good accordance with reported data.

***N*-Phenylbenzamide (2ac)**<sup>[22]</sup>

92% yield. All analytical data were in good accordance with reported data.

***N*-Isopropylpivalamide (2ad)**<sup>[23]</sup>

91% yield. All analytical data were in good accordance with reported data.



### 3. Table S1. Reaction Optimization on Reductive Geminal Cyanation/Phosphonylation<sup>a</sup>

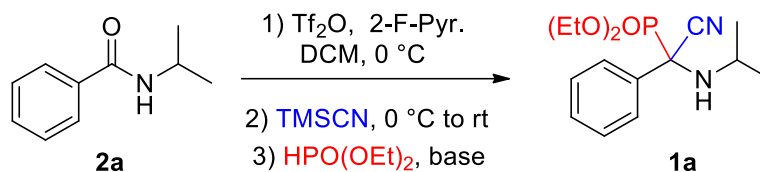

| Entry | TMSCN (equiv) | Phosphite (equiv) | Base                                 | Temp (°C) | Yield (%) <sup>b</sup> |
|-------|---------------|-------------------|--------------------------------------|-----------|------------------------|
| 1     | 1.2           | 2.0               | None                                 | 0 to rt   | 81 (73°)               |
| 2     | 1.0           | 2.0               | None                                 | rt        | 47                     |
| 3     | 1.2           | 2.0               | None                                 | rt        | 81                     |
| 4     | 1.5           | 2.0               | None                                 | rt        | 78                     |
| 5     | 1.2           | 2.0               | None                                 | 45        | 55                     |
| 6     | 1.2           | 2.0               | $\text{NEt}_3$ (2.0 equiv)           | rt        | 40                     |
| 7     | 1.2           | 2.0               | $i\text{Pr}_2\text{NEt}$ (2.0 equiv) | rt        | 70                     |
| 8     | 1.2           | 2.0               | DABCO (2.0 equiv)                    | rt        | 81                     |
| 9     | 1.2           | 2.0               | DBU (2.0 equiv)                      | rt        | 90                     |
| 10    | 1.2           | 2.0               | $\text{NaOH}$ (2.0 equiv)            | rt        | 89                     |
| 11    | 1.2           | 2.0               | $\text{K}_3\text{PO}_4$ (2.0 equiv)  | rt        | 85                     |
| 12    | 1.2           | 2.0               | $\text{Li}_2\text{CO}_3$ (2.0 equiv) | rt        | 84                     |
| 13    | 1.2           | 2.0               | $\text{Cs}_2\text{CO}_3$ (2.0 equiv) | rt        | 89                     |
| 14    | 1.2           | 2.0               | $\text{K}_2\text{CO}_3$ (2.0 equiv)  | rt        | 96 (90°)               |
| 15    | 1.2           | 2.0               | $\text{Na}_2\text{CO}_3$ (2.0 equiv) | rt        | 96 (89°)               |
| 16    | 1.2           | 1.5               | $\text{K}_2\text{CO}_3$ (2.0 equiv)  | rt        | 96 (92°)               |
| 17    | 1.2           | 1.3               | $\text{K}_2\text{CO}_3$ (2.0 equiv)  | rt        | 95 (92°)               |
| 18    | 1.2           | 1.3               | $\text{Na}_2\text{CO}_3$ (2.0 equiv) | rt        | 93(85°)                |
| 19    | 1.2           | 1.1               | $\text{K}_2\text{CO}_3$ (2.0 equiv)  | rt        | 94 (88°)               |
| 20    | 1.2           | 1.3               | $\text{K}_2\text{CO}_3$ (1.8 equiv)  | rt        | 95 (90°)               |
| 21    | 1.2           | 1.3               | $\text{K}_2\text{CO}_3$ (1.5 equiv)  | rt        | 93 (88°)               |

<sup>a</sup> Reaction conditions: amide **2a** (0.500 mmol),  $\text{Tf}_2\text{O}$  (0.550 mmol), 2-F-Pyr. (0.600 mmol),  $\text{CH}_2\text{Cl}_2$  (0.20 M), 0 °C, 10 min.;  $\text{TMSCN}$  (0.600 mmol), 0 °C to rt, 3 h;  $\text{HPO}(\text{OEt})_2$ , base, 10 h. <sup>b</sup> Determined by  $^1\text{H}$  NMR with 1,3,5-trimethoxybenzene as internal standard.

#### 4. Table S2. Base Optimization in Amide Activation<sup>a</sup>

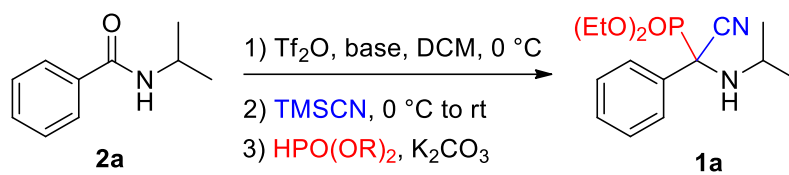

| Entry | Base                   | Yield (%) <sup>b</sup> |
|-------|------------------------|------------------------|
| 1     | $\text{Et}_3\text{N}$  | 59                     |
| 2     | Pyridine               | 76                     |
| 3     | 2-Cl-Pyr. <sup>c</sup> | 78                     |
| 4     | DTBMP <sup>d</sup>     | 45                     |
| 5     | 2-F-Pyr. <sup>e</sup>  | 95                     |

<sup>a</sup> Reaction conditions: amide **2a** (0.500 mmol),  $\text{Tf}_2\text{O}$  (0.550 mmol), base (0.600 mmol),  $\text{CH}_2\text{Cl}_2$  (0.20 M), 0 °C, 10 min.;  $\text{TMSCN}$  (0.600 mmol), 0 °C to rt, 3 h;  $\text{HPO}(\text{OEt})_2$ ,  $\text{K}_2\text{CO}_3$  (1.00 mmol), 10 h. <sup>b</sup> Determined by  $^1\text{H}$  NMR with 1,3,5-trimethoxybenzene as internal standard. <sup>c</sup>Abbreviation for 2-chloropyridine. <sup>d</sup>Abbreviation for 2,6-di-*tert*-butyl-4-methyl pyridine. <sup>e</sup>Abbreviation for 2-fluoropyridine.

## 5. Transformation of Amides into $\alpha$ -Amino- $\alpha$ -cyanophosphonates

### General Procedure

Trifluoromethanesulfonic anhydride ( $\text{ Tf}_2\text{O}$ , 100  $\mu\text{L}$ , 0.550 mmol) was added dropwise to a cooled solution of amides (0.500 mmol) and 2-fluoropyridine (50.0  $\mu\text{L}$ , 0.600 mmol) in dichloromethane (0.20 M) at 0  $^\circ\text{C}$ . After the mixture was stirred for 10 min,  $\text{TMSCN}$  (75.0  $\mu\text{L}$ , 0.600 mmol) was added dropwise at 0  $^\circ\text{C}$ . The resulting mixture was warmed to rt and stirred for 3 h.  $\text{HPO}(\text{OR})_2$  (0.650 mmol) and  $\text{K}_2\text{CO}_3$  (138 mg, 1.00 mmol) were then added to the above mixture and stirred for 10 h. The reaction was quenched with saturated aqueous  $\text{NaHCO}_3$  solution (1 mL) at room temperature. The organic layer was separated and the aqueous phase was extracted with dichloromethane ( $3 \times 10$  mL). The combined organic layers were washed with brine ( $3 \times 3$  mL), dried over anhydrous  $\text{MgSO}_4$ , filtered and concentrated under reduced pressure. The residue was purified by flash column chromatography on silica gel (elution: hexane/ $\text{EtOAc}$ ) to afford the desired  $\alpha$ -amino- $\alpha$ -cyanophosphonates.

### Diethyl (cyano(isopropylamino)(phenyl)methyl)phosphonate (**1a**)

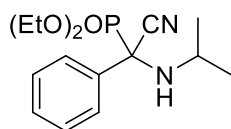

Following the general procedure, the reaction of amide **2a** (81.6 mg, 0.500 mmol) with  $\text{TMSCN}$  (75.0  $\mu\text{L}$ , 0.600 mmol) and  $\text{HPO}(\text{OEt})_2$  (83.0  $\mu\text{L}$ , 0.650 mmol) afforded the  $\alpha$ -amino- $\alpha$ -cyanophosphonate **1a** (143 mg, yield: 92%) after flash column chromatography on silica gel (elution with  $\text{EtOAc}$ /hexane = 1:2) as a pale yellow oil. IR (film): 3295, 2978, 2373, 1253, 1021, 700, 581  $\text{cm}^{-1}$ ;  $^1\text{H}$  NMR (500 MHz,  $\text{CDCl}_3$ )  $\delta$  7.76–7.73 (m, 2H), 7.46–7.34 (m, 3H), 4.31–4.13 (m, 2H), 4.05–3.92 (m, 1H), 3.90–3.79 (m, 1H), 3.01–2.92 (m, 1H), 2.10 (br s, 1H), 1.36 (t,  $J$  = 7.1 Hz, 3H), 1.22 (d,  $J$  = 6.4 Hz, 3H), 1.16 (t,  $J$  = 7.1 Hz, 3H), 0.93 (d,  $J$  = 6.5 Hz, 3H) ppm;  $^{13}\text{C}$  NMR

(125 MHz, CDCl<sub>3</sub>)  $\delta$  132.6 (d,  $J_{C-P}$  = 8.2 Hz), 129.0 (d,  $J_{C-P}$  = 3.2 Hz), 128.3 (d,  $J_{C-P}$  = 2.7 Hz), 127.9 (d,  $J_{C-P}$  = 4.7 Hz), 118.1 (d,  $J_{C-P}$  = 4.9 Hz), 65.2 (d,  $J_{C-P}$  = 7.4 Hz), 62.7 (d,  $J_{C-P}$  = 154.8 Hz), 46.9 (d,  $J_{C-P}$  = 13.2 Hz), 24.7, 23.7, 16.2 (d,  $J_{C-P}$  = 5.6 Hz) 16.1 (d,  $J_{C-P}$  = 5.7 Hz) ppm; <sup>31</sup>P NMR (202 MHz, CDCl<sub>3</sub>)  $\delta$  14.5 ppm; HRMS (ESI) calcd for C<sub>15</sub>H<sub>23</sub>N<sub>2</sub>O<sub>3</sub>PNa [M+Na<sup>+</sup>]: 333.1339, found: 333.1340.

### Diethyl (cyano(isopropylamino)(*p*-tolyl)methyl)phosphonate (**1b**)

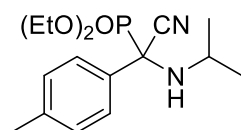

Following the general procedure, the reaction of amide **2b** (88.5 mg, 0.500 mmol) with TMSCN (75.0  $\mu$ L, 0.600 mmol) and HPO(OEt)<sub>2</sub> (83.0  $\mu$ L, 0.650 mmol) afforded the  $\alpha$ -amino- $\alpha$ -cyanophosphonate **1b** (146 mg, yield: 90%) after flash column chromatography on silica gel (elution with EtOAc/hexane = 1:2) as a pale yellow oil. IR (film): 3324, 2968, 2358, 1603, 1255, 1152, 1021, 816, 578 cm<sup>-1</sup>; <sup>1</sup>H NMR (500 MHz, CDCl<sub>3</sub>)  $\delta$  7.63–7.52 (m, 2H), 7.24–7.18 (m, 2H), 4.31–4.15 (m, 2H), 4.05–3.80 (m, 1H), 3.02–2.89 (m, 1H), 2.37 (s, 3H), 2.16–2.00 (m, 1H), 1.36 (t,  $J$  = 7.1 Hz, 3H), 1.21 (d,  $J$  = 6.3 Hz, 3H), 1.17 (t,  $J$  = 7.1 Hz, 3H), 0.93 (d,  $J$  = 6.4 Hz, 3H) ppm; <sup>13</sup>C NMR (125 MHz, CDCl<sub>3</sub>)  $\delta$  139.0 (d,  $J_{C-P}$  = 3.2 Hz), 129.4 (d,  $J_{C-P}$  = 8.3 Hz), 129.1 (d,  $J_{C-P}$  = 2.8 Hz), 127.8 (d,  $J_{C-P}$  = 4.7 Hz), 118.3 (d,  $J_{C-P}$  = 4.6 Hz), 65.3 (d,  $J_{C-P}$  = 7.2 Hz), 65.2 (d,  $J_{C-P}$  = 7.7 Hz), 62.4 (d,  $J_{C-P}$  = 156.1 Hz), 46.8 (d,  $J_{C-P}$  = 13.4 Hz), 24.8, 23.6, 21.1, 16.3 (d,  $J_{C-P}$  = 5.7 Hz), 16.1 (d,  $J_{C-P}$  = 5.7 Hz) ppm; <sup>31</sup>P NMR (202 MHz, CDCl<sub>3</sub>)  $\delta$  14.7 ppm; HRMS (ESI) calcd for C<sub>16</sub>H<sub>25</sub>N<sub>2</sub>O<sub>3</sub>PNa [M+Na<sup>+</sup>]: 347.1495, found: 347.1497.

### Diethyl (cyano(isopropylamino)(*o*-tolyl)methyl)phosphonate (**1c**)

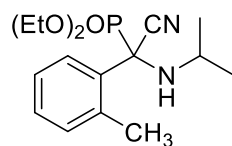

Following the general procedure, the reaction of amide **2c** (88.5 mg, 0.500 mmol) with TMSCN (75.0  $\mu$ L, 0.600 mmol) and HPO(OEt)<sub>2</sub> (83.0  $\mu$ L, 0.650 mmol) afforded the  $\alpha$ -amino- $\alpha$ -cyanophosphonate **1c** (115 mg, yield: 71%) after flash column chromatography on silica gel (elution with EtOAc/hexane = 1:2) as a pale yellow oil. IR (film): 3310, 2967, 2257, 1647, 1429, 1279, 1023, 738, 582  $\text{cm}^{-1}$ ; <sup>1</sup>H NMR (500 MHz, CDCl<sub>3</sub>)  $\delta$  7.85–7.80 (m, 1H), 7.28–7.16 (m, 3H), 4.24–4.09 (m, 2H), 4.04–3.94 (m, 1H), 3.91–3.80 (m, 1H), 3.14–3.03 (m, 1H), 2.75 (d,  $J_{\text{P-H}}$  = 1.8 Hz, 3H), 2.06 (s, 1H), 1.35 (t,  $J$  = 7.1 Hz, 3H), 1.24 (d,  $J$  = 6.3 Hz, 3H), 1.18 (t,  $J$  = 7.1 Hz, 3H), 0.96 (d,  $J$  = 6.4 Hz, 3H) ppm; <sup>13</sup>C NMR (125 MHz, CDCl<sub>3</sub>)  $\delta$  138.3 (d,  $J_{\text{C-P}}$  = 4.5 Hz), 133.0 (d,  $J_{\text{C-P}}$  = 3.1 Hz), 129.6 (d,  $J_{\text{C-P}}$  = 4.6 Hz), 128.8 (d,  $J_{\text{C-P}}$  = 3.2 Hz), 125.7 (d,  $J_{\text{C-P}}$  = 3.0 Hz), 118.5 (d,  $J_{\text{C-P}}$  = 5.2 Hz), 65.1 (d,  $J_{\text{C-P}}$  = 6.5 Hz), 65.1 (d,  $J_{\text{C-P}}$  = 7.0 Hz), 62.7 (d,  $J_{\text{C-P}}$  = 154.2 Hz), 47.2 (d,  $J_{\text{C-P}}$  = 13.0 Hz), 23.9, 23.6, 21.8, 16.3 (d,  $J_{\text{C-P}}$  = 5.6 Hz), 16.1 (d,  $J_{\text{C-P}}$  = 5.5 Hz) ppm; <sup>31</sup>P NMR (202 MHz, CDCl<sub>3</sub>)  $\delta$  15.3 ppm; HRMS (ESI) calcd for C<sub>16</sub>H<sub>24</sub>NO<sub>3</sub>P [M-HCN+H<sup>+</sup>]: 298.1567, found: 298.1566.

**Diethyl (cyano(isopropylamino)(4-methoxyphenyl)methyl)phosphonate (1d)**

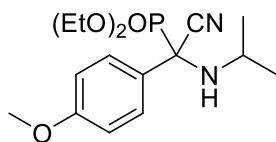

Following the general procedure, the reaction of amide **2d** (96.6 mg, 0.500 mmol) with TMSCN (75.0  $\mu$ L, 0.600 mmol) and HPO(OEt)<sub>2</sub> (83.0  $\mu$ L, 0.650 mmol) afforded the  $\alpha$ -amino- $\alpha$ -cyanophosphonate **1d** (153 mg, yield: 90%) after flash column chromatography on silica gel (elution with EtOAc/hexane = 1:2) as a pale yellow soild. MP: 72–73  $^{\circ}\text{C}$ ; IR (film): 3311, 2977, 2222, 1607, 1509, 1253, 1023, 838, 579  $\text{cm}^{-1}$ ; <sup>1</sup>H NMR (500 MHz, CDCl<sub>3</sub>)  $\delta$  7.72–7.59 (m, 2H), 6.98–6.87 (m, 2H), 4.29–4.13 (m, 2H), 4.05–3.94 (m, 1H), 3.91–3.78 (m, 4H), 3.05–2.88 (m, 1H), 2.12–1.99 (m, 1H), 1.36 (t,  $J$  = 7.1 Hz, 3H), 1.21 (d,  $J$  = 6.3 Hz, 3H), 1.18 (t,  $J$  = 7.1 Hz, 3H), 0.92 (d,  $J$  = 6.4 Hz, 3H) ppm; <sup>13</sup>C NMR (125 MHz, CDCl<sub>3</sub>)  $\delta$  160.1 (d,  $J_{\text{C-P}}$  = 2.7 Hz), 129.3 (d,  $J_{\text{C-P}}$  = 4.7 Hz), 124.1 (d,  $J_{\text{C-P}}$  = 8.5 Hz), 118.3 (d,  $J_{\text{C-P}}$  = 4.1 Hz), 113.7 (d,  $J_{\text{C-P}}$  = 2.7 Hz), 65.2 (d,  $J_{\text{C-P}}$  = 7.2 Hz), 65.1 (d,  $J_{\text{C-P}}$  = 7.7 Hz), 62.0 (d,  $J_{\text{C-P}}$  = 157.5

Hz), 55.3, 46.7 (d,  $J_{C-P}$  = 13.5 Hz), 24.8, 23.6, 16.3 (d,  $J_{C-P}$  = 5.7 Hz), 16.2 (d,  $J_{C-P}$  = 5.5 Hz) ppm;  $^{31}\text{P}$  NMR (202 MHz,  $\text{CDCl}_3$ )  $\delta$  14.7 ppm; HRMS (ESI) calcd for  $\text{C}_{16}\text{H}_{25}\text{N}_2\text{O}_4\text{PNa}$  [ $\text{M}+\text{Na}^+$ ]: 363.1444, found: 363.1450.

#### 4-(Cyano(diethoxyphosphoryl)(isopropylamino)methyl)phenyl acetate (**1e**)

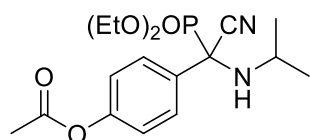

Following the general procedure, the reaction of amide **2e** (111 mg, 0.500 mmol) with  $\text{TMSCN}$  (75.0  $\mu\text{L}$ , 0.600 mmol) and  $\text{HPO}(\text{OEt})_2$  (83.0  $\mu\text{L}$ , 0.650 mmol) afforded the  $\alpha$ -amino- $\alpha$ -cyanophosphonate **1e** (180 mg, yield: 98%) after flash column chromatography on silica gel (elution with  $\text{EtOAc}/\text{hexane}$  = 1:2) as a pale yellow solid. MP: 74–76  $^{\circ}\text{C}$ ; IR (film): 3355, 2978, 2361, 1762, 1200, 1018, 850, 583  $\text{cm}^{-1}$ ;  $^1\text{H}$  NMR (500 MHz,  $\text{CDCl}_3$ )  $\delta$  7.90–7.68 (m, 2H), 7.26–7.08 (m, 2H), 4.28–4.15 (m, 2H), 4.06–3.96 (m, 1H), 3.95–3.82 (m, 1H), 3.05–2.90 (m, 1H), 2.31 (s, 3H), 2.14 – 2.05 (m, 1H), 1.36 (t,  $J$  = 7.1 Hz, 3H), 1.23 (d,  $J$  = 6.3 Hz, 3H), 1.18 (t,  $J$  = 7.1 Hz, 3H), 0.93 (d,  $J$  = 6.4 Hz, 3H) ppm;  $^{13}\text{C}$  NMR (125 MHz,  $\text{CDCl}_3$ )  $\delta$  169.0, 151.2 (d,  $J_{C-P}$  = 3.4 Hz), 130.1 (d,  $J_{C-P}$  = 8.5 Hz), 129.1 (d,  $J_{C-P}$  = 4.6 Hz), 121.5 (d,  $J_{C-P}$  = 2.8 Hz), 118.0 (d,  $J_{C-P}$  = 4.7 Hz), 65.4 (d,  $J_{C-P}$  = 3.7 Hz), 65.3 (d,  $J_{C-P}$  = 4.0 Hz), 62.2 (d,  $J_{C-P}$  = 155.6 Hz), 46.9 (d,  $J_{C-P}$  = 13.1 Hz), 24.8, 23.5, 21.1, 16.3 (d,  $J_{C-P}$  = 5.6 Hz), 16.1 (d,  $J_{C-P}$  = 5.6 Hz) ppm;  $^{31}\text{P}$  NMR (202 MHz,  $\text{CDCl}_3$ )  $\delta$  14.3 ppm; HRMS (ESI) calcd for  $\text{C}_{17}\text{H}_{25}\text{N}_2\text{O}_5\text{PNa}$  [ $\text{M}+\text{Na}^+$ ]: 391.1393, found: 391.1398.

#### Diethyl ((4-chlorophenyl)(cyano)(isopropylamino)methyl)phosphonate (**1f**)

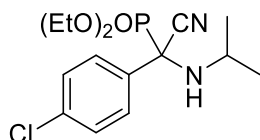

Following the general procedure, the reaction of amide **2f** (98.5 mg, 0.500 mmol) with  $\text{TMSCN}$  (75.0  $\mu\text{L}$ , 0.600 mmol) and  $\text{HPO}(\text{OEt})_2$  (83.0  $\mu\text{L}$ , 0.650 mmol) afforded the  $\alpha$ -amino- $\alpha$ -cyanophosphonate **1f** (155 mg, yield: 90%) after flash column

chromatography on silica gel (elution with EtOAc/hexane = 1:2) as a pale yellow soild. MP: 80–81 °C; IR (film): 3262, 2976, 2363, 1487, 1252, 1022, 838, 581 cm<sup>-1</sup>; <sup>1</sup>H NMR (500 MHz, CDCl<sub>3</sub>) δ 7.72–7.65 (m, 2H), 7.41–7.36 (m, 2H), 4.30–4.16 (m, 2H), 4.10–4.00 (m, 1H), 3.98–3.89 (m, 1H), 3.01–2.91 (m, 1H), 2.14–2.03 (m, 1H), 1.36 (t, *J* = 7.0 Hz, 3H), 1.26–1.16 (m, 6H), 0.91 (d, *J* = 6.4 Hz, 3H) ppm; <sup>13</sup>C NMR (125 MHz, CDCl<sub>3</sub>) δ 135.1 (d, *J*<sub>C-P</sub> = 3.8 Hz), 131.5 (d, *J*<sub>C-P</sub> = 8.6 Hz), 129.3 (d, *J*<sub>C-P</sub> = 4.6 Hz), 128.5 (d, *J*<sub>C-P</sub> = 2.8 Hz), 117.6 (d, *J*<sub>C-P</sub> = 4.9 Hz), 65.3 (d, *J*<sub>C-P</sub> = 7.4 Hz), 62.1 (d, *J*<sub>C-P</sub> = 154.9 Hz), 47.0 (d, *J*<sub>C-P</sub> = 13.1 Hz), 24.6, 23.5, 16.2 (d, *J*<sub>C-P</sub> = 5.6 Hz), 16.1 (d, *J*<sub>C-P</sub> = 5.5 Hz) ppm; <sup>31</sup>P NMR (202 MHz, CDCl<sub>3</sub>) δ 14.1 ppm; HRMS (ESI) calcd for C<sub>15</sub>H<sub>22</sub>ClN<sub>2</sub>O<sub>3</sub>PNa [M+Na<sup>+</sup>]: 367.0949, found: 367.0954.

#### Diethyl (cyano(3,4-dichlorophenyl)(isopropylamino)methyl)phosphonate (**1g**)

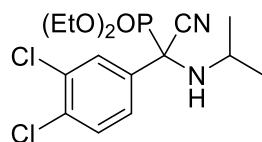

Following the general procedure, the reaction of amide **2g** (116 mg, 0.500 mmol) with TMSCN (75.0 μL, 0.600 mmol) and HPO(OEt)<sub>2</sub> (83.0 μL, 0.650 mmol) afforded the α-amino-α-cyanophosphonate **1g** (151 mg, yield: 80%) after flash column chromatography on silica gel (elution with EtOAc/hexane = 1:2) as a pale yellow soild. MP: 95–96 °C; IR (film): 3437, 2976, 2930, 2225, 1590, 1466, 1384, 1256, 1141, 1021, 972, 592 cm<sup>-1</sup>; <sup>1</sup>H NMR (500 MHz, CDCl<sub>3</sub>) δ 7.84–7.77 (m, 1H), 7.60–7.52 (m, 1H), 7.51–7.43 (m, 1H), 4.31–4.14 (m, 2H), 4.13–3.95 (m, 2H), 3.02–2.87 (m, 1H), 2.18–2.01 (m, 1H), 1.34 (t, *J* = 7.1 Hz, 3H), 1.28–1.16 (m, 6H), 0.90 (d, *J* = 6.4 Hz, 3H) ppm; <sup>13</sup>C NMR (125 MHz, CDCl<sub>3</sub>) δ 133.6 (d, *J*<sub>C-P</sub> = 8.7 Hz), 133.3 (d, *J*<sub>C-P</sub> = 3.8 Hz), 132.7 (d, *J*<sub>C-P</sub> = 3.2 Hz), 130.2 (d, *J*<sub>C-P</sub> = 2.8 Hz), 129.9 (d, *J*<sub>C-P</sub> = 4.6 Hz), 127.2 (d, *J*<sub>C-P</sub> = 4.5 Hz), 117.1 (d, *J*<sub>C-P</sub> = 4.8 Hz), 65.6 (d, *J*<sub>C-P</sub> = 6.4 Hz), 65.5 (d, *J*<sub>C-P</sub> = 7.1 Hz), 61.9 (d, *J*<sub>C-P</sub> = 153.9 Hz), 47.3 (d, *J*<sub>C-P</sub> = 13.0 Hz), 24.7, 23.5, 16.2 (d, *J*<sub>C-P</sub> = 5.8 Hz), 16.1 (d, *J*<sub>C-P</sub> = 5.8 Hz) ppm; <sup>31</sup>P NMR (202 MHz, CDCl<sub>3</sub>) δ 13.6 ppm; HRMS (ESI) calcd for C<sub>15</sub>H<sub>21</sub>N<sub>2</sub>Cl<sub>2</sub>O<sub>3</sub>PNa [M+Na<sup>+</sup>]: 401.0559, found: 401.0559.

**Diethyl ((2-chlorophenyl)(cyano)(isopropylamino)methyl)phosphonate (1h)**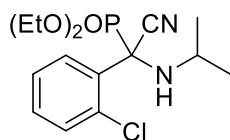

Following the general procedure, the reaction of amide **2h** (98.5 mg, 0.500 mmol) with TMSCN (75.0  $\mu$ L, 0.600 mmol) and HPO(OEt)<sub>2</sub> (83.0  $\mu$ L, 0.650 mmol) afforded the  $\alpha$ -amino- $\alpha$ -cyanophosphonate **1h** (138 mg, yield: 80%) after flash column chromatography on silica gel (elution with EtOAc/hexane = 1:2) as a pale yellow oil. IR (film): 3100, 2972, 2929, 1616, 1467, 1254, 1027, 970, 763, 564  $\text{cm}^{-1}$ ; <sup>1</sup>H NMR (500 MHz, CDCl<sub>3</sub>)  $\delta$  7.99–7.92 (m, 1H), 7.43–7.38 (m, 1H), 7.35–7.27 (m, 2H), 4.42–4.28 (m, 2H), 4.09–3.99 (m, 1H), 3.98–3.88 (m, 1H), 3.18–3.01 (m, 1H), 2.63–2.52 (m, 1H), 1.40 (t,  $J$  = 7.1 Hz, 3H), 1.25 (d,  $J$  = 6.3 Hz, 3H), 1.16 (t,  $J$  = 7.1 Hz, 3H), 0.98 (d,  $J$  = 6.4 Hz, 3H) ppm; <sup>13</sup>C NMR (125 MHz, CDCl<sub>3</sub>)  $\delta$  133.2 (d,  $J_{\text{C-P}}$  = 5.0 Hz), 132.0 (d,  $J_{\text{C-P}}$  = 2.7 Hz), 131.6 (d,  $J_{\text{C-P}}$  = 4.6 Hz), 130.0 (d,  $J_{\text{C-P}}$  = 2.9 Hz), 129.9 (d,  $J_{\text{C-P}}$  = 7.0 Hz), 117.1 (d,  $J_{\text{C-P}}$  = 8.3 Hz), 65.7 (d,  $J_{\text{C-P}}$  = 7.2 Hz), 65.1 (d,  $J_{\text{C-P}}$  = 7.4 Hz), 62.3 (d,  $J_{\text{C-P}}$  = 150.7 Hz), 47.4 (d,  $J_{\text{C-P}}$  = 12.8 Hz), 24.0, 23.4, 16.3 (d,  $J_{\text{C-P}}$  = 5.6 Hz), 16.0 (d,  $J_{\text{C-P}}$  = 5.7 Hz) ppm; <sup>31</sup>P NMR (202 MHz, CDCl<sub>3</sub>)  $\delta$  13.6 ppm; HRMS (ESI) calcd for C<sub>14</sub>H<sub>21</sub>ClNO<sub>3</sub>PNa [M-HCN+Na<sup>+</sup>]: 340.0840, found: 340.0789.

**Diethyl ((3-bromophenyl)(cyano)(isopropylamino)methyl)phosphonate (1i)**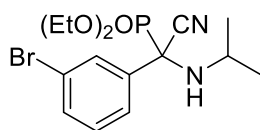

Following the general procedure, the reaction of amide **2i** (121 mg, 0.500 mmol) with TMSCN (75.0  $\mu$ L, 0.600 mmol) and HPO(OEt)<sub>2</sub> (83.0  $\mu$ L, 0.650 mmol) afforded the  $\alpha$ -amino- $\alpha$ -cyanophosphonate **1i** (159 mg, yield: 82%) after flash column chromatography on silica gel (elution with EtOAc/hexane = 1:2) as a pale yellow soild. MP: 93–94  $^{\circ}\text{C}$ ; IR (film): 3292, 2977, 2222, 1470, 1255, 1021, 789, 584  $\text{cm}^{-1}$ ; <sup>1</sup>H NMR (500 MHz, CDCl<sub>3</sub>)  $\delta$  7.91–7.87 (m, 1H), 7.71–7.65 (m, 1H), 7.54–7.49 (m, 1H), 7.32–7.26 (m, 1H), 4.31–4.15 (m, 2H), 4.11–3.93 (m, 2H), 3.03–2.91 (m, 1H), 2.18–2.06 (m, 1H), 1.36 (t,  $J$  = 7.0 Hz, 3H), 1.25–1.19 (m, 6H), 0.93 (d,  $J$  = 6.3 Hz,



3H) ppm;  $^{13}\text{C}$  NMR (125 MHz,  $\text{CDCl}_3$ )  $\delta$  135.4 (d,  $J_{\text{C-P}} = 8.6$  Hz), 132.2 (d,  $J_{\text{C-P}} = 3.0$  Hz), 130.9 (d,  $J_{\text{C-P}} = 4.5$  Hz), 129.8 (d,  $J_{\text{C-P}} = 2.8$  Hz), 126.6 (d,  $J_{\text{C-P}} = 4.6$  Hz), 122.4 (d,  $J_{\text{C-P}} = 3.4$  Hz), 117.4 (d,  $J_{\text{C-P}} = 4.9$  Hz), 65.5 (d,  $J_{\text{C-P}} = 5.5$  Hz), 65.4 (d,  $J_{\text{C-P}} = 5.3$  Hz), 62.2 (d,  $J_{\text{C-P}} = 153.7$  Hz), 47.2 (d,  $J_{\text{C-P}} = 13.0$  Hz), 24.7, 23.5, 16.2 (d,  $J_{\text{C-P}} = 5.7$  Hz), 16.1 (d,  $J_{\text{C-P}} = 5.8$  Hz) ppm;  $^{31}\text{P}$  NMR (202 MHz,  $\text{CDCl}_3$ )  $\delta$  13.9 ppm; HRMS (ESI) calcd for  $\text{C}_{15}\text{H}_{22}\text{BrN}_2\text{O}_3\text{PNa}$  [ $\text{M}+\text{Na}^+$ ]: 411.0444, found: 411.0451.

**Diethyl (cyano(isopropylamino)(4-(trifluoromethyl)phenyl)methyl)phosphonate (1j)**

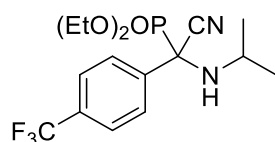

Following the general procedure, the reaction of amide **2j** (116 mg, 0.500 mmol) with  $\text{TMSCN}$  (75.0  $\mu\text{L}$ , 0.600 mmol) and  $\text{HPO}(\text{OEt})_2$  (83.0  $\mu\text{L}$ , 0.650 mmol) afforded the  $\alpha$ -amino- $\alpha$ -cyanophosphonate **1j** (170 mg, yield: 90%) after flash column chromatography on silica gel (elution with  $\text{EtOAc}$ /hexane = 1:2) as a pale yellow soild. MP: 62–63  $^{\circ}\text{C}$ ; IR (film): 3297, 2980, 2230, 1618, 1327, 1256, 1128, 1018, 846, 806, 577  $\text{cm}^{-1}$ ;  $^1\text{H}$  NMR (500 MHz,  $\text{CDCl}_3$ )  $\delta$  7.92–7.86 (m, 2H), 7.70–7.66 (m, 2H), 4.32–4.18 (m, 2H), 4.13–3.92 (m, 2H), 3.04–2.88 (m, 1H), 2.22–2.11 (m, 1H), 1.37 (t,  $J = 7.1$  Hz, 3H), 1.24 (d,  $J = 6.3$  Hz, 3H), 1.21 (t,  $J = 7.1$  Hz, 3H), 0.91 (d,  $J = 6.5$  Hz, 3H) ppm;  $^{13}\text{C}$  NMR (125 MHz,  $\text{CDCl}_3$ )  $\delta$  137.5 (d,  $J_{\text{C-P}} = 8.7$  Hz), 131.4 (qd,  $J_{\text{C-F}} = 32.8$ ,  $J_{\text{C-P}} = 3.3$  Hz), 128.6 (d,  $J_{\text{C-P}} = 4.3$  Hz), 125.7–125.3 (m), 123.9 (q,  $J_{\text{C-F}} = 272.2$  Hz), 117.6 (d,  $J_{\text{C-P}} = 5.2$  Hz), 65.7 (d,  $J_{\text{C-P}} = 7.6$  Hz), 65.6 (d,  $J_{\text{C-P}} = 7.3$  Hz), 62.7 (d,  $J_{\text{C-P}} = 153.1$  Hz), 47.5 (d,  $J_{\text{C-P}} = 13.1$  Hz), 24.8, 23.7, 16.4 (d,  $J_{\text{C-P}} = 5.6$  Hz), 16.3 (d,  $J_{\text{C-P}} = 5.5$  Hz);  $^{31}\text{P}$  NMR (202 MHz,  $\text{CDCl}_3$ )  $\delta$  13.8 ppm;  $^{19}\text{F}$  NMR (471 MHz,  $\text{CDCl}_3$ )  $\delta$  -62.7 ppm; HRMS (ESI) calcd for  $\text{C}_{16}\text{H}_{22}\text{F}_3\text{N}_2\text{O}_3\text{PNa}$  [ $\text{M}+\text{Na}^+$ ]: 401.1212, found: 401.1218.

**Diethyl (cyano(isopropylamino)(4-nitrophenyl)methyl)phosphonate (1k)**

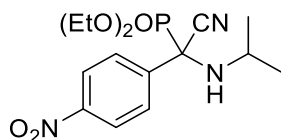

Following the general procedure, the reaction of amide **2k** (104 mg, 0.500 mmol) with TMSCN (75.0  $\mu$ L, 0.600 mmol) and HPO(OEt)<sub>2</sub> (83.0  $\mu$ L, 0.650 mmol) afforded the  $\alpha$ -amino- $\alpha$ -cyanophosphonate **1k** (163 mg, yield: 92%) after flash column chromatography on silica gel (elution with EtOAc/hexane = 1:2) as a pale yellow solid. MP: 95–96 °C; IR (film): 3266, 2973, 2227, 1525, 1347, 1252, 1022, 855, 582  $\text{cm}^{-1}$ ; <sup>1</sup>H NMR (500 MHz, CDCl<sub>3</sub>)  $\delta$  8.32–8.21 (m, 2H), 7.99–7.91 (m, 2H), 4.33–4.19 (m, 2H), 4.16–3.97 (m, 2H), 3.06–2.92 (m, 1H), 2.27–2.15 (m, 1H), 1.37 (t,  $J$  = 7.0 Hz, 3H), 1.27–1.21 (m, 6H), 0.90 (d,  $J$  = 6.6 Hz, 3H) ppm; <sup>13</sup>C NMR (125 MHz, CDCl<sub>3</sub>)  $\delta$  148.3 (d,  $J_{\text{C-P}}$  = 3.5 Hz), 140.7 (d,  $J_{\text{C-P}}$  = 8.7 Hz), 129.0 (d,  $J_{\text{C-P}}$  = 4.4 Hz), 123.3 (d,  $J_{\text{C-P}}$  = 2.9 Hz), 116.9 (d,  $J_{\text{C-P}}$  = 5.7 Hz), 65.7 (d,  $J_{\text{C-P}}$  = 7.7 Hz), 65.6 (d,  $J_{\text{C-P}}$  = 7.3 Hz), 62.6 (d,  $J_{\text{C-P}}$  = 151.2 Hz), 47.8 (d,  $J_{\text{C-P}}$  = 12.8 Hz), 24.8, 23.7, 16.4 (d,  $J_{\text{C-P}}$  = 5.6 Hz), 16.3 (d,  $J_{\text{C-P}}$  = 5.8 Hz) ppm; <sup>31</sup>P NMR (202 MHz, CDCl<sub>3</sub>)  $\delta$  13.4 ppm; HRMS (ESI) calcd for C<sub>15</sub>H<sub>22</sub>N<sub>3</sub>O<sub>5</sub>PNa [M+Na<sup>+</sup>]: 378.1189, found: 378.1194.

#### Diethyl (cyano(4-cyanophenyl)(isopropylamino)methyl)phosphonate (**1l**)

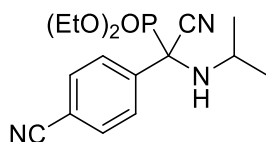

Following the general procedure, the reaction of amide **2l** (94.0 mg, 0.500 mmol) with TMSCN (75.0  $\mu$ L, 0.600 mmol) and HPO(OEt)<sub>2</sub> (83.0  $\mu$ L, 0.650 mmol) afforded the  $\alpha$ -amino- $\alpha$ -cyanophosphonate **1l** (149 mg, yield: 89%) after flash column chromatography on silica gel (elution with EtOAc/hexane = 1:2) as a pale yellow solid. MP: 69–70 °C; IR (film): 3318, 2978, 2230, 1500, 1258, 1019, 844, 584  $\text{cm}^{-1}$ ; <sup>1</sup>H NMR (500 MHz, CDCl<sub>3</sub>)  $\delta$  7.94–7.85 (m, 2H), 7.77–7.68 (m, 2H), 4.33–4.17 (m, 2H), 4.14–3.95 (m, 2H), 3.03–2.91 (m, 1H), 2.23–2.14 (m, 1H), 1.36 (t,  $J$  = 7.1 Hz, 3H), 1.26–1.19 (m, 6H), 0.89 (d,  $J$  = 6.7 Hz, 3H) ppm; <sup>13</sup>C NMR (125 MHz, CDCl<sub>3</sub>)  $\delta$

138.7 (d,  $J_{C-P}$  = 8.8 Hz), 131.9 (d,  $J_{C-P}$  = 3.0 Hz), 128.7 (d,  $J_{C-P}$  = 4.5 Hz), 118.0 (d,  $J_{C-P}$  = 1.9 Hz), 116.9 (d,  $J_{C-P}$  = 5.5 Hz), 113.0 (d,  $J_{C-P}$  = 3.3 Hz), 65.6 (d,  $J_{C-P}$  = 7.6 Hz), 65.5 (d,  $J_{C-P}$  = 7.4 Hz), 62.6 (d,  $J_{C-P}$  = 151.8 Hz), 47.4 (d,  $J_{C-P}$  = 12.8 Hz), 24.5, 23.5, 16.2 (d,  $J_{C-P}$  = 5.8 Hz), 16.1 (d,  $J_{C-P}$  = 5.7 Hz) ppm;  $^{31}\text{P}$  NMR (202 MHz,  $\text{CDCl}_3$ )  $\delta$  13.5 ppm; HRMS (ESI) calcd for  $\text{C}_{16}\text{H}_{22}\text{N}_3\text{O}_3\text{PNa}$  [ $\text{M}+\text{Na}^+$ ]: 358.1291, found: 358.1295.

**Diethyl (*E*)-(cyano(isopropylamino)(4-(phenyldiazenyl)phenyl)methyl)phosphonate (**1m**)**

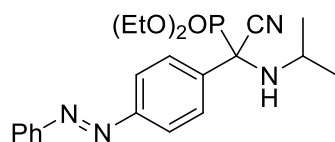

Following the general procedure, the reaction of amide **2m** (134 mg, 0.500 mmol) with  $\text{TMSCN}$  (75.0  $\mu\text{L}$ , 0.600 mmol) and  $\text{HPO}(\text{OEt})_2$  (83.0  $\mu\text{L}$ , 0.650 mmol) afforded the  $\alpha$ -amino- $\alpha$ -cyanophosphonate **1m** (174 mg, yield: 84%) after flash column chromatography on silica gel (elution with  $\text{EtOAc}$ /hexane = 1:2) as a pale yellow solid. MP: 91–92 °C; IR (film): 3410, 2975, 1609, 1439, 1255, 1141, 635, 585  $\text{cm}^{-1}$ ;  $^1\text{H}$  NMR (500 MHz,  $\text{CDCl}_3$ )  $\delta$  8.02–7.87 (m, 6H), 7.58–7.44 (m, 3H), 4.33–4.17 (m, 2H), 4.12–3.89 (m, 2H), 3.08–2.97 (m, 1H), 2.21–2.16 (m, 1H), 1.38 (t,  $J$  = 7.1 Hz, 3H), 1.25 (d,  $J$  = 6.2 Hz, 3H), 1.20 (t,  $J$  = 7.1 Hz, 3H), 0.95 (d,  $J$  = 6.4, 3H) ppm;  $^{13}\text{C}$  NMR (125 MHz,  $\text{CDCl}_3$ )  $\delta$  152.8 (d,  $J_{C-P}$  = 3.7 Hz), 152.5, 135.5 (d,  $J_{C-P}$  = 8.8 Hz), 131.3, 129.1, 128.8 (d,  $J_{C-P}$  = 4.8 Hz), 122.9, 122.6 (d,  $J_{C-P}$  = 3.0 Hz), 117.8 (d,  $J_{C-P}$  = 5.1 Hz), 65.5 (d,  $J_{C-P}$  = 7.4 Hz) 62.7 (d,  $J_{C-P}$  = 153.9 Hz), 47.2 (d,  $J_{C-P}$  = 13.2 Hz), 24.7, 23.6, 16.3 (d,  $J_{C-P}$  = 5.7 Hz), 16.2 (d,  $J_{C-P}$  = 5.6 Hz) ppm;  $^{31}\text{P}$  NMR (202 MHz,  $\text{CDCl}_3$ )  $\delta$  14.1 ppm; HRMS (ESI) calcd for  $\text{C}_{21}\text{H}_{27}\text{N}_4\text{O}_3\text{PNa}$  [ $\text{M}+\text{Na}^+$ ]: 437.1713, found: 437.1713.

**Diethyl ((4-acetylphenyl)(cyano)(isopropylamino)methyl)phosphonate (**1n**)**

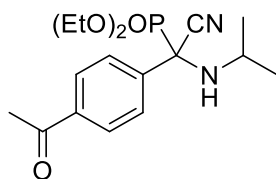

Following the general procedure, the reaction of amide **2n** (103 mg, 0.500 mmol) with TMSCN (75.0  $\mu$ L, 0.600 mmol) and HPO(OEt)<sub>2</sub> (83.0  $\mu$ L, 0.650 mmol) afforded the  $\alpha$ -amino- $\alpha$ -cyanophosphonate **1n** (162 mg, yield: 92%) after flash column chromatography on silica gel (elution with EtOAc/hexane = 1:2) as a pale yellow soild. MP: 82–83 °C; IR (film): 3300, 2978, 2351, 1687, 1261, 1048, 841, 599  $\text{cm}^{-1}$ ; <sup>1</sup>H NMR (500 MHz, CDCl<sub>3</sub>)  $\delta$  8.04–7.96 (m, 2H), 7.89–7.81 (m, 2H), 4.32–4.18 (m, 2H), 4.11–4.01 (m, 1H), 4.01–3.91 (m, 1H), 3.02–2.92 (m, 1H), 2.63 (s, 3H), 2.22–2.11 (m, 1H), 1.37 (t, *J* = 7.1 Hz, 3H), 1.24 (d, *J* = 6.3 Hz, 3H), 1.20 (t, *J* = 7.1 Hz, 3H), 0.91 (d, *J* = 6.4 Hz, 3H) ppm; <sup>13</sup>C NMR (125 MHz, CDCl<sub>3</sub>)  $\delta$  197.3, 138.1 (d, *J*<sub>C-P</sub> = 8.6 Hz), 137.5 (d, *J*<sub>C-P</sub> = 3.0 Hz), 128.2 (d, *J*<sub>C-P</sub> = 4.5 Hz), 128.2 (d, *J*<sub>C-P</sub> = 2.8 Hz), 117.5 (d, *J*<sub>C-P</sub> = 5.4 Hz), 65.5 (d, *J*<sub>C-P</sub> = 7.4 Hz), 65.5 (d, *J*<sub>C-P</sub> = 7.1 Hz), 62.7 (d, *J*<sub>C-P</sub> = 152.9 Hz), 47.2 (d, *J*<sub>C-P</sub> = 13.1 Hz), 26.6, 24.6, 23.5, 16.2 (d, *J*<sub>C-P</sub> = 5.6 Hz), 16.1 (d, *J*<sub>C-P</sub> = 5.6 Hz) ppm; <sup>31</sup>P NMR (202 MHz, CDCl<sub>3</sub>)  $\delta$  13.8 ppm; HRMS (ESI) calcd for C<sub>17</sub>H<sub>25</sub>N<sub>2</sub>O<sub>4</sub>PNa [M+Na<sup>+</sup>]: 375.1444, found: 375.1451.

#### Methyl 4-(cyano(diethoxyphosphoryl)(isopropylamino)methyl)benzoate (**1o**)

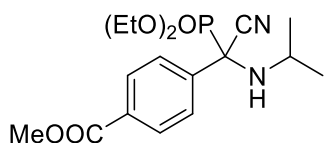

Following the general procedure, the reaction of amide **2o** (111 mg, 0.500 mmol) with TMSCN (75.0  $\mu$ L, 0.600 mmol) and HPO(OEt)<sub>2</sub> (83.0  $\mu$ L, 0.650 mmol) afforded the  $\alpha$ -amino- $\alpha$ -cyanophosphonate **1o** (161 mg, yield: 87%) after flash column chromatography on silica gel (elution with EtOAc/hexane = 1:2) as a pale yellow soild. MP: 78–79 °C; IR (film): 3325, 2978, 2216, 1726, 1437, 1280, 1019, 767, 581  $\text{cm}^{-1}$ ; <sup>1</sup>H NMR (500 MHz, CDCl<sub>3</sub>)  $\delta$  8.10–8.02 (m, 2H), 7.83–7.78 (m, 2H), 4.27–4.12 (m, 2H), 4.05–3.95 (m, 1H), 3.95–3.85 (m, 4H), 2.99–2.88 (m, 1H), 2.17–2.10 (m, 1H), 1.33 (t, *J* = 7.1 Hz, 3H), 1.20 (d, *J* = 6.3 Hz, 3H), 1.16 (t, *J* = 7.0 Hz, 3H), 0.87

(d,  $J = 6.4$ , 3H) ppm;  $^{13}\text{C}$  NMR (125 MHz,  $\text{CDCl}_3$ )  $\delta$  166.3, 138.0 (d,  $J_{\text{C-P}} = 8.5$  Hz), 130.8 (d,  $J_{\text{C-P}} = 3.0$  Hz), 129.4 (d,  $J_{\text{C-P}} = 2.8$  Hz), 128.0 (d,  $J_{\text{C-P}} = 4.5$  Hz), 117.5 (d,  $J_{\text{C-P}} = 5.3$  Hz), 65.5 (d,  $J_{\text{C-P}} = 7.6$  Hz), 65.5 (d,  $J_{\text{C-P}} = 7.2$  Hz), 62.7 (d,  $J_{\text{C-P}} = 152.7$  Hz), 52.2, 47.2 (d,  $J_{\text{C-P}} = 13.1$  Hz), 24.6, 23.5, 16.2 (d,  $J_{\text{C-P}} = 5.7$  Hz), 16.1 (d,  $J_{\text{C-P}} = 5.6$  Hz) ppm;  $^{31}\text{P}$  NMR (202 MHz,  $\text{CDCl}_3$ )  $\delta$  13.9 ppm; HRMS (ESI) calcd for  $\text{C}_{17}\text{H}_{25}\text{N}_2\text{O}_5\text{PNa}$  [ $\text{M}+\text{Na}^+$ ]: 391.1393, found: 391.1399.

### Diethyl (cyano(isopropylamino)(naphthalen-2-yl)methyl)phosphonate (**1p**)

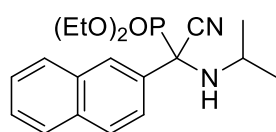

Following the general procedure, the reaction of amide **2p** (107 mg, 0.500 mmol) with  $\text{TMSCN}$  (75.0  $\mu\text{L}$ , 0.600 mmol) and  $\text{HPO}(\text{OEt})_2$  (83.0  $\mu\text{L}$ , 0.650 mmol) afforded the  $\alpha$ -amino- $\alpha$ -cyanophosphonate **1p** (159 mg, yield: 88%) after flash column chromatography on silica gel (elution with  $\text{EtOAc}/\text{hexane} = 1:2$ ) as a pale yellow solid. MP: 71–72  $^{\circ}\text{C}$ ; IR (film): 3295, 2977, 2219, 1367, 1255, 1022, 750, 571  $\text{cm}^{-1}$ ;  $^1\text{H}$  NMR (500 MHz,  $\text{CDCl}_3$ )  $\delta$  8.25–8.20 (m, 1H), 7.94–7.82 (m, 4H), 7.55–7.51 (m, 2H), 4.34–4.16 (m, 2H), 4.06–3.94 (m, 1H), 3.90–3.81 (m, 1H), 3.06–2.94 (m, 1H), 2.24–2.16 (m, 1H), 1.36 (t,  $J = 7.0$  Hz, 3H), 1.24 (d,  $J = 6.3$  Hz, 3H), 1.13 (t,  $J = 7.0$  Hz, 3H), 0.93 (d,  $J = 6.4$  Hz, 3H) ppm;  $^{13}\text{C}$  NMR (125 MHz,  $\text{CDCl}_3$ )  $\delta$  133.4 (d,  $J_{\text{C-P}} = 2.3$  Hz), 132.7 (d,  $J_{\text{C-P}} = 2.7$  Hz), 130.1 (d,  $J_{\text{C-P}} = 8.6$  Hz), 128.3, 128.0 (d,  $J_{\text{C-P}} = 2.4$  Hz), 127.8 (d,  $J_{\text{C-P}} = 6.6$  Hz), 127.5, 126.5, 124.9 (d,  $J_{\text{C-P}} = 3.2$  Hz), 118.2 (d,  $J_{\text{C-P}} = 4.6$  Hz), 65.3 (d,  $J_{\text{C-P}} = 7.5$  Hz), 62.9 (d,  $J_{\text{C-P}} = 155.0$  Hz), 47.0 (d,  $J_{\text{C-P}} = 13.4$  Hz), 24.7, 23.6, 16.3 (d,  $J_{\text{C-P}} = 5.6$  Hz), 16.1 (d,  $J_{\text{C-P}} = 5.7$  Hz) ppm;  $^{31}\text{P}$  NMR (202 MHz,  $\text{CDCl}_3$ )  $\delta$  14.5 ppm; HRMS (ESI) calcd for  $\text{C}_{19}\text{H}_{25}\text{N}_2\text{O}_3\text{PNa}$  [ $\text{M}+\text{Na}^+$ ]: 383.1495, found: 383.1502.

### Diethyl (cyano(cyclohexylamino)(phenyl)methyl)phosphonate (**1q**)

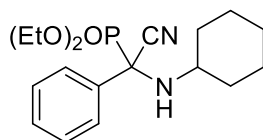

Following the general procedure, the reaction of amide **2q** (102 mg, 0.500 mmol) with TMSCN (75.0  $\mu$ L, 0.600 mmol) and HPO(OEt)<sub>2</sub> (83.0  $\mu$ L, 0.650 mmol) afforded the  $\alpha$ -amino- $\alpha$ -cyanophosphonate **1q** (149 mg, yield: 85%) after flash column chromatography on silica gel (elution with EtOAc/hexane = 1:2) as a pale yellow solid. MP: 55–56 °C; IR (film): 3853, 3362, 2927, 2215, 1448, 1254, 1021, 800, 699, 583  $\text{cm}^{-1}$ ; <sup>1</sup>H NMR (500 MHz, CDCl<sub>3</sub>)  $\delta$  7.79–7.71 (m, 2H), 7.47–7.34 (m, 3H), 4.31–4.14 (m, 2H), 4.02–3.92 (m, 1H), 3.90–3.79 (m, 1H), 2.67–2.54 (m, 1H), 2.18–2.10 (m, 2H), 1.73–1.64 (m, 1H), 1.63–1.44 (m, 3H), 1.35 (t,  $J$  = 7.1 Hz, 3H), 1.31–0.99 (m, 8H) ppm; <sup>13</sup>C NMR (125 MHz, CDCl<sub>3</sub>)  $\delta$  132.8 (d,  $J_{\text{C-P}}$  = 8.3 Hz), 129.1 (d,  $J_{\text{C-P}}$  = 3.2 Hz), 128.3 (d,  $J_{\text{C-P}}$  = 2.8 Hz), 128.0 (d,  $J_{\text{C-P}}$  = 4.6 Hz), 118.2 (d,  $J_{\text{C-P}}$  = 4.8 Hz), 65.3 (d,  $J_{\text{C-P}}$  = 7.4 Hz), 62.5 (d,  $J_{\text{C-P}}$  = 154.7 Hz), 54.4 (d,  $J_{\text{C-P}}$  = 12.6 Hz), 35.2, 34.1, 25.6, 25.1 (d,  $J_{\text{C-P}}$  = 9.5 Hz), 16.3 (d,  $J_{\text{C-P}}$  = 5.8 Hz), 16.2 (d,  $J_{\text{C-P}}$  = 5.7 Hz) ppm; <sup>31</sup>P NMR (202 MHz, CDCl<sub>3</sub>)  $\delta$  14.5 ppm; HRMS (ESI) calcd for C<sub>18</sub>H<sub>27</sub>N<sub>2</sub>O<sub>3</sub>PNa [M+Na<sup>+</sup>]: 373.1652, found: 373.1655.

#### Diethyl (cyano(cyclopropylamino)(phenyl)methyl)phosphonate (**1r**)

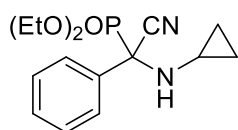

Following the general procedure, the reaction of amide **2r** (80.5 mg, 0.500 mmol) with TMSCN (75.0  $\mu$ L, 0.600 mmol) and HPO(OEt)<sub>2</sub> (83.0  $\mu$ L, 0.650 mmol) afforded the  $\alpha$ -amino- $\alpha$ -cyanophosphonate **1r** (125 mg, yield: 81%) after flash column chromatography on silica gel (elution with EtOAc/hexane = 1:2) as a pale yellow oil. IR (film): 3280, 2982, 1599, 1449, 1391, 1252, 1195, 1019, 972, 699, 580  $\text{cm}^{-1}$ ; <sup>1</sup>H NMR (500 MHz, CDCl<sub>3</sub>)  $\delta$  7.78–7.68 (m, 2H), 7.47–7.35 (m, 3H), 4.30–4.18 (m, 2H), 3.98–3.87 (m, 1H), 3.81–3.67 (m, 1H), 2.91–2.80 (m, 1H), 2.18–2.07 (m, 1H), 1.36 (t,  $J$  = 7.1 Hz, 3H), 1.10 (t,  $J$  = 7.0 Hz, 3H), 0.72–0.63 (m, 1H), 0.55–0.43 (m, 1H),

0.38–0.27 (m, 2H) ppm;  $^{13}\text{C}$  NMR (125 MHz,  $\text{CDCl}_3$ )  $\delta$  132.2 (d,  $J_{\text{C-P}} = 6.6$  Hz), 129.1 (d,  $J_{\text{C-P}} = 2.9$  Hz), 128.5 (d,  $J_{\text{C-P}} = 2.5$  Hz), 127.9 (d,  $J_{\text{C-P}} = 4.6$  Hz), 117.2 (d,  $J_{\text{C-P}} = 6.3$  Hz), 65.3 (d,  $J_{\text{C-P}} = 7.5$  Hz), 65.1 (d,  $J_{\text{C-P}} = 7.3$  Hz), 63.6 (d,  $J_{\text{C-P}} = 153.5$  Hz), 27.1 (d,  $J_{\text{C-P}} = 16.0$  Hz), 16.3 (d,  $J_{\text{C-P}} = 5.7$  Hz), 16.0 (d,  $J_{\text{C-P}} = 5.6$  Hz), 6.3, 6.1 ppm;  $^{31}\text{P}$  NMR (202 MHz,  $\text{CDCl}_3$ )  $\delta$  14.2 ppm; HRMS (ESI) calcd for  $\text{C}_{15}\text{H}_{21}\text{N}_2\text{O}_3\text{PNa}$  [ $\text{M}+\text{Na}^+$ ]: 331.1182, found: 331.1182.

**Diethyl (cyano(((S)-1-methoxy-3-methylbutan-2-yl)amino)(phenyl)methyl)phosphonate (1s)**

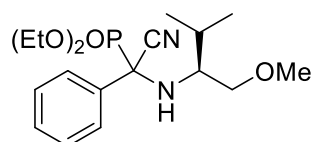

Following the general procedure, the reaction of amide **2s** (111 mg, 0.500 mmol) with  $\text{TMSCN}$  (75.0  $\mu\text{L}$ , 0.600 mmol) and  $\text{HPO}(\text{OEt})_2$  (83.0  $\mu\text{L}$ , 0.650 mmol) afforded the  $\alpha$ -amino- $\alpha$ -cyanophosphonate **1s** (149 mg, yield: 81%, dr = 1:1.5) after flash column chromatography on silica gel (elution with  $\text{EtOAc}$ /hexane = 1:2) as a pale yellow oil. IR (film): 3331, 2962, 2222, 1448, 1257, 1049, 1022, 700, 581  $\text{cm}^{-1}$ ;  $^1\text{H}$  NMR (500 MHz,  $\text{CDCl}_3$ )  $\delta$  7.84–7.71 (m, 2H), 7.45–7.33 (m, 3H), 4.42–4.27 (m, 1H), 4.26–4.17 (m, 1H), 4.09–3.99 (m, 0.6H), 3.97–3.85 (m, 1H), 3.76–3.66 (m, 0.4H), 3.65–3.56 (m, 0.6H), 3.44–3.32 (m, 2.2H), 3.12–3.02 (m, 1.8H), 2.97–2.90 (m, 0.4H), 2.79–2.69 (m, 1.4H), 2.64–2.56 (m, 0.6H), 2.10–2.00 (m, 0.4H), 1.69–1.58 (m, 0.6 H), 1.40 (t,  $J = 7.1$  Hz, 1.2H), 1.35 (t,  $J = 7.1$  Hz, 1.8H), 1.18 (t,  $J = 7.1$  Hz, 1.8H), 1.08 (t,  $J = 7.1$  Hz, 1.2H), 0.97 (d,  $J = 6.9$  Hz, 1.2H), 0.94 (d,  $J = 6.9$  Hz, 1.2H), 0.88 (d,  $J = 7.0$  Hz, 1.8H), 0.81 (d,  $J = 6.9$  Hz, 1.8H) ppm;  $^{13}\text{C}$  NMR (125 MHz,  $\text{CDCl}_3$ )  $\delta$  133.5 (d,  $J_{\text{C-P}} = 5.6$  Hz), 131.8 (d,  $J_{\text{C-P}} = 8.7$  Hz), 129.2 (d,  $J_{\text{C-P}} = 3.0$  Hz), 129.0 (d,  $J_{\text{C-P}} = 2.7$  Hz), 128.4 (d,  $J_{\text{C-P}} = 4.9$  Hz), 128.3 (d,  $J_{\text{C-P}} = 2.4$  Hz), 128.3 (d,  $J_{\text{C-P}} = 2.8$  Hz), 127.8 (d,  $J_{\text{C-P}} = 4.9$  Hz), 118.5 (d,  $J_{\text{C-P}} = 3.3$  Hz), 117.5 (d,  $J_{\text{C-P}} = 8.8$  Hz), 71.5, 70.2, 65.5 (d,  $J_{\text{C-P}} = 7.3$  Hz), 65.3 (d,  $J_{\text{C-P}} = 7.2$  Hz), 65.0 (d,  $J_{\text{C-P}} = 7.8$  Hz), 65.0 (d,  $J_{\text{C-P}} = 7.3$  Hz), 63.0 (d,  $J_{\text{C-P}} = 153.0$  Hz), 62.4 (d,  $J_{\text{C-P}} = 157.2$  Hz), 59.8 (d,  $J_{\text{C-P}} = 12.4$  Hz), 58.9 (d,

$J_{\text{C-P}} = 12.6$  Hz), 58.6, 58.5, 30.4, 29.7, 18.8 (d,  $J_{\text{C-P}} = 106.4$  Hz), 18.6 (d,  $J_{\text{C-P}} = 119.6$  Hz), 16.4 (d,  $J_{\text{C-P}} = 6.0$  Hz), 16.3 (d,  $J_{\text{C-P}} = 5.7$  Hz), 16.2 (d,  $J_{\text{C-P}} = 5.6$  Hz), 16.0 (d,  $J_{\text{C-P}} = 5.6$  Hz) ppm;  $^{31}\text{P}$  NMR (202 MHz,  $\text{CDCl}_3$ )  $\delta$  14.7, 14.5 ppm; HRMS (ESI) calcd for  $\text{C}_{18}\text{H}_{29}\text{N}_2\text{O}_4\text{PNa}$  [ $\text{M}+\text{Na}^+$ ]: 391.1757, found: 391.1762.

#### Diethyl (cyano(ethylamino)(phenyl)methyl)phosphonate (**1t**)

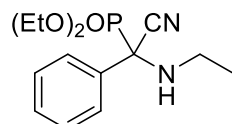

Following the general procedure, the reaction of amide **2t** (74.5 mg, 0.500 mmol) with  $\text{TMSCN}$  (75.0  $\mu\text{L}$ , 0.600 mmol) and  $\text{HPO}(\text{OEt})_2$  (83.0  $\mu\text{L}$ , 0.650 mmol) afforded the  $\alpha$ -amino- $\alpha$ -cyanophosphonate **1t** (136 mg, yield: 92%) after flash column chromatography on silica gel (elution with  $\text{EtOAc}/\text{hexane} = 1:2$ ) as a pale yellow solid. MP: 69–70  $^{\circ}\text{C}$ ; IR (film): 3283, 2978, 2219, 1448, 1254, 1020, 793, 700, 581  $\text{cm}^{-1}$ ;  $^1\text{H}$  NMR (500 MHz,  $\text{CDCl}_3$ )  $\delta$  7.74–7.64 (m, 2H), 7.47–7.35 (m, 3H), 4.25–4.12 (m, 2H), 4.08–3.90 (m, 2H), 2.85–2.70 (m, 1H), 2.54–2.38 (m, 1H), 2.22–2.10 (m, 1H), 1.34 (t,  $J = 7.1$  Hz, 3H), 1.20 (t,  $J = 7.1$  Hz, 3H), 1.16 (t,  $J = 7.1$  Hz, 3H) ppm;  $^{13}\text{C}$  NMR (125 MHz,  $\text{CDCl}_3$ )  $\delta$  131.8 (d,  $J_{\text{C-P}} = 8.7$  Hz), 129.3 (d,  $J_{\text{C-P}} = 3.2$  Hz), 128.7 (d,  $J_{\text{C-P}} = 3.0$  Hz), 127.9 (d,  $J_{\text{C-P}} = 4.5$  Hz), 117.5 (d,  $J_{\text{C-P}} = 2.8$  Hz), 65.2 (d,  $J_{\text{C-P}} = 7.1$  Hz), 65.1 (d,  $J_{\text{C-P}} = 7.5$  Hz), 64.0 (d,  $J_{\text{C-P}} = 157.6$  Hz), 39.4 (d,  $J_{\text{C-P}} = 13.1$  Hz), 16.3 (d,  $J_{\text{C-P}} = 5.7$  Hz), 16.2 (d,  $J_{\text{C-P}} = 5.6$  Hz), 15.1 ppm;  $^{31}\text{P}$  NMR (202 MHz,  $\text{CDCl}_3$ )  $\delta$  14.3 ppm; HRMS (ESI) calcd for  $\text{C}_{14}\text{H}_{21}\text{N}_2\text{O}_3\text{PNa}$  [ $\text{M}+\text{Na}^+$ ]: 319.1182, found: 319.1183.

#### Diethyl (cyano((3-methoxypropyl)amino)(phenyl)methyl)phosphonate (**1u**)

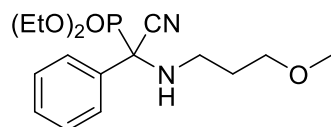

Following the general procedure, the reaction of amide **2u** (96.5 mg, 0.500 mmol) with  $\text{TMSCN}$  (75.0  $\mu\text{L}$ , 0.600 mmol) and  $\text{HPO}(\text{OEt})_2$  (83.0  $\mu\text{L}$ , 0.650 mmol) afforded



the  $\alpha$ -amino- $\alpha$ -cyanophosphonate **1u** (151 mg, yield: 89%) after flash column chromatography on silica gel (elution with EtOAc/hexane = 1:2) as a pale yellow soild. MP: 75–76 °C; IR (film): 3312, 2928, 2216, 1655, 1448, 1257, 1021, 793, 700, 581  $\text{cm}^{-1}$ ;  $^1\text{H}$  NMR (500 MHz,  $\text{CDCl}_3$ )  $\delta$  7.71–7.63 (m, 2H), 7.45–7.35 (m, 3H), 4.22–4.12 (m, 2H), 4.08–3.88 (m, 2H), 3.51–3.44 (m, 2H), 3.33 (s, 3H), 2.83–2.75 (m, 1H), 2.62–2.48 (m, 2H), 1.87–1.76 (m, 2H), 1.34 (t,  $J = 7.0$  Hz, 3H), 1.20 (t,  $J = 7.0$  Hz, 3H) ppm;  $^{13}\text{C}$  NMR (125 MHz,  $\text{CDCl}_3$ )  $\delta$  131.5 (d,  $J_{\text{C-P}} = 8.6$  Hz), 129.1 (d,  $J_{\text{C-P}} = 3.2$  Hz), 128.5 (d,  $J_{\text{C-P}} = 2.8$  Hz), 127.7 (d,  $J_{\text{C-P}} = 4.4$  Hz), 117.3 (d,  $J_{\text{C-P}} = 2.9$  Hz), 71.3, 65.2 (d,  $J_{\text{C-P}} = 7.1$  Hz), 65.1 (d,  $J_{\text{C-P}} = 7.5$  Hz), 63.8 (d,  $J_{\text{C-P}} = 157.6$  Hz), 58.6, 42.7 (d,  $J_{\text{C-P}} = 13.3$  Hz), 29.5, 16.2 (d,  $J_{\text{C-P}} = 5.7$  Hz), 16.2 (d,  $J_{\text{C-P}} = 5.7$  Hz) ppm;  $^{31}\text{P}$  NMR (202 MHz,  $\text{CDCl}_3$ )  $\delta$  14.2 ppm; HRMS (ESI) calcd for  $\text{C}_{16}\text{H}_{25}\text{N}_2\text{O}_4\text{PNa}$   $[\text{M}+\text{Na}^+]$ : 363.1444, found: 363.1448.

**Methyl 3-((cyano(diethoxyphosphoryl)(phenyl)methyl)amino)propanoate (1v)**

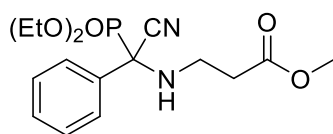

Following the general procedure, the reaction of amide **2v** (104 mg, 0.500 mmol) with  $\text{TMSCN}$  (75.0  $\mu\text{L}$ , 0.600 mmol) and  $\text{HPO}(\text{OEt})_2$  (83.0  $\mu\text{L}$ , 0.650 mmol) afforded the  $\alpha$ -amino- $\alpha$ -cyanophosphonate **1v** (151 mg, yield: 85%) after flash column chromatography on silica gel (elution with EtOAc/hexane = 1:2) as a pale yellow soild. MP: 71–72 °C; IR (film): 3283, 2984, 2219, 1737, 1439, 1257, 1020, 756, 699, 581  $\text{cm}^{-1}$ ;  $^1\text{H}$  NMR (500 MHz,  $\text{CDCl}_3$ )  $\delta$  7.70–7.64 (m, 2H), 7.44–7.35 (m, 3H), 4.19–4.11 (m, 2H), 4.05–3.85 (m, 2H), 3.68 (s, 3H), 3.07–2.95 (m, 1H), 2.81–2.72 (m, 1H), 2.70–2.59 (m, 1H), 2.54 (t,  $J = 6.2$  Hz, 2H), 1.32 (t,  $J = 7.1$  Hz, 3H), 1.17 (t,  $J = 7.1$  Hz, 3H) ppm;  $^{13}\text{C}$  NMR (125 MHz,  $\text{CDCl}_3$ )  $\delta$  172.3, 131.2 (d,  $J_{\text{C-P}} = 8.2$  Hz), 129.2 (d,  $J_{\text{C-P}} = 3.1$  Hz), 128.6 (d,  $J_{\text{C-P}} = 2.8$  Hz), 127.7 (d,  $J_{\text{C-P}} = 4.4$  Hz), 117.0 (d,  $J_{\text{C-P}} = 3.4$  Hz), 65.3 (d,  $J_{\text{C-P}} = 7.7$  Hz), 65.2 (d,  $J_{\text{C-P}} = 8.2$  Hz), 63.5 (d,  $J_{\text{C-P}} = 157.5$  Hz), 51.7, 40.0 (d,  $J_{\text{C-P}} = 14.0$  Hz), 34.1, 16.2 (d,  $J_{\text{C-P}} = 5.6$  Hz), 16.1 (d,  $J_{\text{C-P}} = 5.8$  Hz) ppm;  $^{31}\text{P}$  NMR (202 MHz,  $\text{CDCl}_3$ )  $\delta$  13.9 ppm; HRMS (ESI) calcd for  $\text{C}_{16}\text{H}_{23}\text{N}_2\text{O}_5\text{PNa}$   $[\text{M}+\text{Na}^+]$ : 377.1237, found: 377.1243.

**Diethyl (((2-chloroethyl)amino)(cyano)(phenyl)methyl)phosphonate (1w)**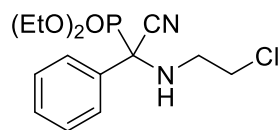

Following the general procedure, the reaction of amide **2w** (88.6 mg, 0.500 mmol) with TMSCN (75.0  $\mu$ L, 0.600 mmol) and HPO(OEt)<sub>2</sub> (83.0  $\mu$ L, 0.650 mmol) afforded the  $\alpha$ -amino- $\alpha$ -cyanophosphonate **1w** (139 mg, yield: 84%) after flash column chromatography on silica gel (elution with EtOAc/hexane = 1:2) as a pale yellow solid. MP: 73–74 °C; IR (film): 3255, 2983, 2201, 1599, 1488, 1259, 1022, 758, 699, 581  $\text{cm}^{-1}$ ; <sup>1</sup>H NMR (500 MHz, CDCl<sub>3</sub>)  $\delta$  7.75–7.67 (m, 2H), 7.49–7.37 (m, 3H), 4.26–4.14 (m, 2H), 4.11–3.89 (m, 2H), 3.73–3.61 (m, 2H), 3.15–3.03 (m, 1H), 2.85–2.71 (m, 2H), 1.35 (t,  $J$  = 7.1 Hz, 3H), 1.21 (t,  $J$  = 7.1 Hz, 3H) ppm; <sup>13</sup>C NMR (125 MHz, CDCl<sub>3</sub>)  $\delta$  131.1 (d,  $J_{\text{C-P}}$  = 8.2 Hz), 129.4 (d,  $J_{\text{C-P}}$  = 3.1 Hz), 128.7 (d,  $J_{\text{C-P}}$  = 2.7 Hz), 127.6 (d,  $J_{\text{C-P}}$  = 4.3 Hz), 116.9 (d,  $J_{\text{C-P}}$  = 3.2 Hz), 65.3 (d,  $J_{\text{C-P}}$  = 7.2 Hz), 65.2 (d,  $J_{\text{C-P}}$  = 7.6 Hz), 63.0 (d,  $J_{\text{C-P}}$  = 157.8 Hz), 45.8 (d,  $J_{\text{C-P}}$  = 13.4 Hz), 44.0, 16.2 (d,  $J_{\text{C-P}}$  = 5.7 Hz), 16.1 (d,  $J_{\text{C-P}}$  = 5.7 Hz) ppm; <sup>31</sup>P NMR (202 MHz, CDCl<sub>3</sub>)  $\delta$  13.7 ppm; HRMS (ESI) calcd for C<sub>14</sub>H<sub>20</sub>CIN<sub>2</sub>O<sub>3</sub>PNa [M+Na<sup>+</sup>]: 353.0792, found: 353.0797.

**Diethyl (((2-bromoethyl)amino)(cyano)(phenyl)methyl)phosphonate (1x)**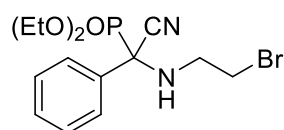

Following the general procedure, the reaction of amide **2x** (114 mg, 0.500 mmol) with TMSCN (75.0  $\mu$ L, 0.600 mmol) and HPO(OEt)<sub>2</sub> (83.0  $\mu$ L, 0.650 mmol) afforded the  $\alpha$ -amino- $\alpha$ -cyanophosphonate **1x** (153 mg, yield: 82%) after flash column chromatography on silica gel (elution with EtOAc/hexane = 1:2) as a pale yellow solid. MP: 99–100 °C; IR (film): 3307, 2980, 1251, 1032, 697, 579  $\text{cm}^{-1}$ ; <sup>1</sup>H NMR (500 MHz, CDCl<sub>3</sub>)  $\delta$  7.73–7.67 (m, 2H), 7.48–7.37 (m, 3H), 4.25–4.15 (m, 2H),

4.13–3.90 (m, 2H), 3.59–3.45 (m, 2H), 3.20–3.09 (m, 1H), 2.91–2.81 (m, 1H), 2.81–2.71 (m, 1H), 1.35 (t,  $J = 7.1$  Hz, 3H), 1.21 (t,  $J = 7.0$  Hz, 3H) ppm;  $^{13}\text{C}$  NMR (125 MHz,  $\text{CDCl}_3$ )  $\delta$  131.2 (d,  $J_{\text{C-P}} = 8.3$  Hz), 129.4 (d,  $J_{\text{C-P}} = 3.0$  Hz), 128.7 (d,  $J_{\text{C-P}} = 2.8$  Hz), 127.6 (d,  $J_{\text{C-P}} = 4.4$  Hz), 116.9 (d,  $J_{\text{C-P}} = 3.5$  Hz), 65.4 (d,  $J_{\text{C-P}} = 7.3$  Hz), 65.3 (d,  $J_{\text{C-P}} = 7.6$  Hz), 63.0 (d,  $J_{\text{C-P}} = 157.6$  Hz), 45.7 (d,  $J_{\text{C-P}} = 13.5$  Hz), 32.3, 16.2 (d,  $J_{\text{C-P}} = 5.6$  Hz), 16.1 (d,  $J_{\text{C-P}} = 5.7$  Hz) ppm;  $^{31}\text{P}$  NMR (202 MHz,  $\text{CDCl}_3$ )  $\delta$  13.7 ppm; HRMS (ESI) calcd for  $\text{C}_{14}\text{H}_{20}\text{BrN}_2\text{O}_3\text{PNa}$  [ $\text{M}+\text{Na}^+$ ]: 397.0287, found: 397.0297.

### Diethyl (cyano(phenyl)(pyrrolidin-1-yl)methyl)phosphonate (**1y**)

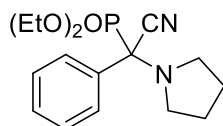

Following the general procedure, the reaction of amide **2y** (128 mg, 0.500 mmol) with  $\text{TMSCN}$  (75.0  $\mu\text{L}$ , 0.600 mmol) and  $\text{HPO}(\text{OEt})_2$  (83.0  $\mu\text{L}$ , 0.650 mmol) afforded the  $\alpha$ -amino- $\alpha$ -cyanophosphonate **1y** (106 mg, yield: 66%) after flash column chromatography on silica gel (elution with  $\text{EtOAc}$ /hexane = 1:2) as a pale yellow oil. IR (film): 2973, 2843, 1489, 1261, 1032, 697, 578  $\text{cm}^{-1}$ ;  $^1\text{H}$  NMR (500 MHz,  $\text{CDCl}_3$ )  $\delta$  7.88–7.70 (m, 2H), 7.43–7.36 (m, 3H), 4.28–4.15 (m, 2H), 3.85–3.69 (m, 1H), 3.39–3.25 (m, 1H), 2.86–2.75 (m, 2H), 2.72–2.60 (m, 2H), 1.88–1.76 (m, 4H), 1.37 (t,  $J = 7.0$  Hz, 3H), 1.05 (td,  $J = 7.1$ ,  $J_{\text{P-H}} = 0.8$  Hz, 3H) ppm;  $^{13}\text{C}$  NMR (125 MHz,  $\text{CDCl}_3$ )  $\delta$  133.2 (d,  $J_{\text{C-P}} = 8.7$  Hz), 129.1 (d,  $J_{\text{C-P}} = 3.0$  Hz), 128.4 (d,  $J_{\text{C-P}} = 2.6$  Hz), 128.2 (d,  $J_{\text{C-P}} = 4.6$  Hz), 114.7, 69.4 (d,  $J_{\text{C-P}} = 164.9$  Hz), 64.9 (d,  $J_{\text{C-P}} = 7.2$  Hz), 64.1 (d,  $J_{\text{C-P}} = 8.5$  Hz), 50.1 (d,  $J_{\text{C-P}} = 6.5$  Hz), 23.4, 16.2 (d,  $J_{\text{C-P}} = 6.0$  Hz), 16.0 (d,  $J_{\text{C-P}} = 5.6$  Hz) ppm;  $^{31}\text{P}$  NMR (202 MHz,  $\text{CDCl}_3$ )  $\delta$  13.5 ppm; HRMS (ESI) calcd for  $\text{C}_{16}\text{H}_{23}\text{N}_2\text{O}_3\text{PNa}$  [ $\text{M}+\text{Na}^+$ ]: 345.1339, found: 345.1351.

### Diethyl ((benzylamino)(cyano)(phenyl)methyl)phosphonate (**1z**)

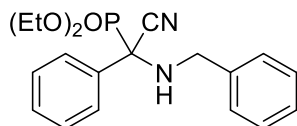

Following the general procedure, the reaction of amide **2z** (106 mg, 0.500 mmol) with TMSCN (75.0  $\mu$ L, 0.600 mmol) and HPO(OEt)<sub>2</sub> (83.0  $\mu$ L, 0.650 mmol) afforded the  $\alpha$ -amino- $\alpha$ -cyanophosphonate **1z** (150 mg, yield: 84%) after flash column chromatography on silica gel (elution with EtOAc/hexane = 1:2) as a pale yellow soild. MP: 70–71 °C; IR (film): 3282, 2925, 2359, 1455, 1255, 1020, 698, 583  $\text{cm}^{-1}$ ; <sup>1</sup>H NMR (500 MHz, CDCl<sub>3</sub>)  $\delta$  7.86–7.71 (m, 2H), 7.49–7.39 (m, 3H), 7.39–7.31 (m, 4H), 7.30–7.25 (m, 1H), 4.26–4.12 (m, 2H), 4.12–3.91 (m, 2H), 3.85 (dd,  $J$  = 12.3, 4.3 Hz, 1H), 3.63 – 3.57 (m, 1H), 2.60–2.45 (m, 1H), 1.34 (t,  $J$  = 7.1 Hz, 3H), 1.21 (t,  $J$  = 7.1 Hz, 3H) ppm; <sup>13</sup>C NMR (126 MHz, CDCl<sub>3</sub>)  $\delta$  138.2, 131.3 (d,  $J_{\text{C-P}}$  = 8.6 Hz), 129.3 (d,  $J_{\text{C-P}}$  = 3.2 Hz), 128.7 (d,  $J_{\text{C-P}}$  = 2.8 Hz), 128.5, 128.3, 127.7 (d,  $J_{\text{C-P}}$  = 4.5 Hz), 127.5, 117.1 (d,  $J_{\text{C-P}}$  = 3.1 Hz), 65.3 (d,  $J_{\text{C-P}}$  = 7.2 Hz), 65.2 (d,  $J_{\text{C-P}}$  = 7.6 Hz), 63.7 (d,  $J_{\text{C-P}}$  = 157.5 Hz), 48.9 (d,  $J_{\text{C-P}}$  = 13.5 Hz), 16.3 (d,  $J_{\text{C-P}}$  = 5.6 Hz), 16.2 (d,  $J_{\text{C-P}}$  = 5.8 Hz) ppm; <sup>31</sup>P NMR (202 MHz, CDCl<sub>3</sub>)  $\delta$  13.9 ppm; HRMS (ESI) calcd for C<sub>19</sub>H<sub>23</sub>N<sub>2</sub>O<sub>3</sub>PNa [M+Na<sup>+</sup>]: 381.1339, found: 381.1342.

#### Diethyl ((allylamino)(cyano)(phenyl)methyl)phosphonate (**1aa**)

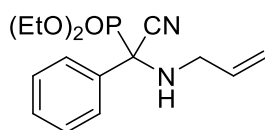

Following the general procedure, the reaction of amide **2aa** (80.5 mg, 0.500 mmol) with TMSCN (75.0  $\mu$ L, 0.600 mmol) and HPO(OEt)<sub>2</sub> (83.0  $\mu$ L, 0.650 mmol) afforded the  $\alpha$ -amino- $\alpha$ -cyanophosphonate **1aa** (137 mg, yield: 89%) after flash column chromatography on silica gel (elution with EtOAc/hexane = 1:2) as a pale yellow soild. MP: 69–70 °C; IR (film): 3280, 2984, 2222, 1255, 1021, 758, 698, 580  $\text{cm}^{-1}$ ; <sup>1</sup>H NMR (500 MHz, CDCl<sub>3</sub>)  $\delta$  7.74–7.63 (m, 2H), 7.47–7.35 (m, 3H), 5.99–5.82 (m, 1H), 5.33–5.22 (m, 1H), 5.19–5.09 (m, 1H), 4.22–4.13 (m, 2H), 4.10–3.91 (m, 2H),

3.39–3.28 (m, 1H), 3.12–3.01 (m, 1H), 2.45–2.20 (m, 1H), 1.34 (t,  $J = 7.0$  Hz, 3H), 1.21 (t,  $J = 7.0$  Hz, 3H) ppm;  $^{13}\text{C}$  NMR (125 MHz,  $\text{CDCl}_3$ )  $\delta$  134.7, 131.3 (d,  $J_{\text{C-P}} = 8.4$  Hz), 129.2 (d,  $J_{\text{C-P}} = 3.2$  Hz), 128.6 (d,  $J_{\text{C-P}} = 2.7$  Hz), 127.6 (d,  $J_{\text{C-P}} = 4.4$  Hz), 117.1 (d,  $J_{\text{C-P}} = 2.9$  Hz), 117.0, 65.3 (d,  $J_{\text{C-P}} = 7.1$  Hz), 65.2 (d,  $J_{\text{C-P}} = 7.5$  Hz), 63.4 (d,  $J_{\text{C-P}} = 157.4$  Hz), 47.2 (d,  $J_{\text{C-P}} = 13.3$  Hz), 16.2 (d,  $J_{\text{C-P}} = 5.6$  Hz), 16.2 (d,  $J_{\text{C-P}} = 5.6$  Hz) ppm;  $^{31}\text{P}$  NMR (202 MHz,  $\text{CDCl}_3$ )  $\delta$  14.0 ppm; HRMS (ESI) calcd for  $\text{C}_{15}\text{H}_{21}\text{N}_2\text{O}_3\text{PNa}$  [ $\text{M}+\text{Na}^+$ ]: 331.1182, found: 331.1185.

### Methyl 3-((cyano(diethoxyphosphoryl)(phenyl)methyl)amino)propanoate (**1ad**)

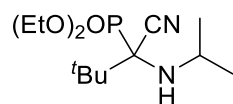

Following the general procedure, the reaction of amide **2ad** (43.0 mg, 0.500 mmol) with  $\text{TMSCN}$  (75.0  $\mu\text{L}$ , 0.600 mmol) and  $\text{HPO}(\text{OEt})_2$  (83.0  $\mu\text{L}$ , 0.650 mmol) afforded the  $\alpha$ -amino- $\alpha$ -cyanophosphonate **1ad** (98.7 mg, yield: 68%) after flash column chromatography on silica gel (elution with  $\text{EtOAc}$ /hexane = 1:2) as a pale yellow oil. IR (film): 3310, 2927, 2355, 1666, 1462, 1396, 1201, 1055, 997, 753, 546  $\text{cm}^{-1}$ ;  $^1\text{H}$  NMR (500 MHz,  $\text{CDCl}_3$ )  $\delta$  4.32–4.15 (m, 4H), 3.32–3.24 (m, 1H), 1.40–1.34 (m, 6H), 1.18 (s, 9H), 1.14 (t,  $J = 6.3$  Hz, 6H) ppm;  $^{13}\text{C}$  NMR (125 MHz,  $\text{CDCl}_3$ )  $\delta$  117.1 (d,  $J_{\text{C-P}} = 4.6$  Hz), 64.5 (d,  $J_{\text{C-P}} = 148.3$  Hz), 64.3 (d,  $J_{\text{C-P}} = 8.1$  Hz), 63.9 (d,  $J_{\text{C-P}} = 7.8$  Hz), 47.9 (d,  $J_{\text{C-P}} = 1.9$  Hz), 39.8 (d,  $J_{\text{C-P}} = 4.0$  Hz), 26.2 (d,  $J_{\text{C-P}} = 4.5$  Hz), 24.9 (d,  $J_{\text{C-P}} = 1.8$  Hz), 24.6, 16.4 (d,  $J_{\text{C-P}} = 5.6$  Hz), 16.3 (d,  $J_{\text{C-P}} = 5.8$  Hz) ppm;  $^{31}\text{P}$  NMR (202 MHz,  $\text{CDCl}_3$ )  $\delta$  18.0 ppm; HRMS (ESI) calcd for  $\text{C}_{13}\text{H}_{27}\text{N}_2\text{O}_3\text{PNa}$  [ $\text{M}+\text{Na}^+$ ]: 313.1652, found: 313.1660.

### Dimethyl (cyano(isopropylamino)(phenyl)methyl)phosphonate (**1ae**)

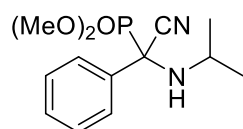

Following the general procedure, the reaction of amide **2a** (81.6 mg, 0.500 mmol) with TMSCN (75.0  $\mu$ L, 0.600 mmol) and HPO(OMe)<sub>2</sub> (60.0  $\mu$ L, 0.650 mmol) afforded the  $\alpha$ -amino- $\alpha$ -cyanophosphonate **1ae** (130 mg, yield: 92%) after flash column chromatography on silica gel (elution with EtOAc/hexane = 1:2) as a pale yellow oil. IR (film): 3302, 2964, 2857, 2359, 2341, 1782, 1693, 1385, 1033, 839, 699, 580  $\text{cm}^{-1}$ ; <sup>1</sup>H NMR (500 MHz, CDCl<sub>3</sub>)  $\delta$  7.77–7.70 (m, 2H), 7.45–7.36 (m, 3H), 3.89–3.82 (m, 3H), 3.61–3.55 (m, 3H), 3.00–2.89 (m, 1H), 2.15–2.06 (m, 1H), 1.23 (d,  $J$  = 6.3 Hz, 3H), 0.92 (d,  $J$  = 6.4 Hz, 3H) ppm; <sup>13</sup>C NMR (125 MHz, CDCl<sub>3</sub>)  $\delta$  132.2 (d,  $J_{\text{C-P}}$  = 8.2 Hz), 129.2 (d,  $J_{\text{C-P}}$  = 3.1 Hz), 128.5 (d,  $J_{\text{C-P}}$  = 2.8 Hz), 127.9 (d,  $J_{\text{C-P}}$  = 4.6 Hz), 117.9 (d,  $J_{\text{C-P}}$  = 4.7 Hz), 62.4 (d,  $J_{\text{C-P}}$  = 156.1 Hz), 55.6 (d,  $J_{\text{C-P}}$  = 7.2 Hz), 55.5 (d,  $J_{\text{C-P}}$  = 7.4 Hz), 46.8 (d,  $J_{\text{C-P}}$  = 13.3 Hz), 24.7, 23.5 ppm; <sup>31</sup>P NMR (202 MHz, CDCl<sub>3</sub>)  $\delta$  16.8 ppm; HRMS (ESI) calcd for C<sub>13</sub>H<sub>19</sub>N<sub>2</sub>O<sub>3</sub>PNa [M+Na<sup>+</sup>]: 305.1026, found: 305.1030.

#### Diisopropyl (cyano(isopropylamino)(phenyl)methyl)phosphonate (**1af**)

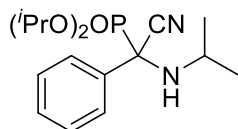

Following the general procedure, the reaction of amide **2a** (81.6 mg, 0.500 mmol) with TMSCN (75.0  $\mu$ L, 0.600 mmol) and HPO(O<sup>*i*</sup>Pr)<sub>2</sub> (106  $\mu$ L, 0.650 mmol) afforded the  $\alpha$ -amino- $\alpha$ -cyanophosphonate **1af** (144 mg, yield: 85%) after flash column chromatography on silica gel (elution with EtOAc/hexane = 1:2) as a pale yellow oil. IR (film): 3316, 2979, 2357, 1639, 1385, 1250, 1009, 697, 584  $\text{cm}^{-1}$ ; <sup>1</sup>H NMR (500 MHz, CDCl<sub>3</sub>)  $\delta$  7.76–7.69 (m, 2H), 7.41–7.32 (m, 3H), 4.87–4.74 (m, 1H), 4.54–4.39 (m, 1H), 3.05–2.86 (m, 1H), 2.15–2.02 (m, 1H), 1.39 (d,  $J$  = 6.2 Hz, 3H), 1.33 (d,  $J$  = 6.2 Hz, 3H), 1.24–1.18 (m, 6H), 1.03 (d,  $J$  = 6.2 Hz, 3H), 0.89 (d,  $J$  = 6.4 Hz, 3H) ppm; <sup>13</sup>C NMR (125 MHz, CDCl<sub>3</sub>)  $\delta$  132.9 (d,  $J_{\text{C-P}}$  = 7.9 Hz), 128.9 (d,  $J_{\text{C-P}}$  = 3.1 Hz), 128.1 (d,  $J_{\text{C-P}}$  = 2.7 Hz), 128.1 (d,  $J_{\text{C-P}}$  = 4.8 Hz), 118.3 (d,  $J_{\text{C-P}}$  = 5.3 Hz), 74.2 (d,  $J_{\text{C-P}}$  = 5.2 Hz), 74.1 (d,  $J_{\text{C-P}}$  = 5.4 Hz), 62.9 (d,  $J_{\text{C-P}}$  = 156.2 Hz), 46.9 (d,  $J_{\text{C-P}}$  = 13.5 Hz),

24.7, 24.0 (d,  $J_{\text{C-P}} = 3.2$  Hz), 23.9 (d,  $J_{\text{C-P}} = 3.3$  Hz), 23.6, 23.5 (d,  $J_{\text{C-P}} = 5.9$  Hz), 23.1 (d,  $J_{\text{C-P}} = 6.2$  Hz) ppm;  $^{31}\text{P}$  NMR (202 MHz,  $\text{CDCl}_3$ )  $\delta$  12.9 ppm; HRMS (ESI) calcd for  $\text{C}_{17}\text{H}_{27}\text{N}_2\text{O}_3\text{PNa}$   $[\text{M}+\text{Na}^+]$ : 361.1652, found: 361.1660.

## 6. Gram-scale Synthesis of **1z**

Trifluoromethanesulfonic anhydride (Tf<sub>2</sub>O, 1.00 mL, 5.50 mmol) was added dropwise to a cooled solution of amides **2z** (1.06 g, 5.00 mmol) and 2-fluoropyridine (500  $\mu$ L, 6.00 mmol) in dichloromethane (0.20 M) at 0 °C. After the mixture was stirred for 10 min, TMSCN (750  $\mu$ L, 6.00 mmol) was added dropwise at 0 °C. The resulting mixture was warmed to rt and stirred for 3 h. HPO(OEt)<sub>2</sub> (830  $\mu$ L, 6.50 mmol) and K<sub>2</sub>CO<sub>3</sub> (1.38 g, 10.0 mmol) were then added to the above mixture and stirred for 10 h. The reaction was quenched with saturated aqueous NaHCO<sub>3</sub> solution (10 mL) at room temperature. The organic layer was separated and the aqueous phase was extracted with dichloromethane (3  $\times$  30 mL). The combined organic layers were washed with brine (3  $\times$  10 mL), dried over anhydrous MgSO<sub>4</sub>, filtered and concentrated under reduced pressure. The residue was purified by flash column chromatography on silica gel (elution: hexane/EtOAc) to afford the desired  $\alpha$ -amino- $\alpha$ -cyanophosphonates **1z** (1.43 g, yield: 80%).



## 7. References

1. Deng, Y.-L.; Tang, S.; Ding, G.-L.; Wang, M.-W.; Li, J.; Li, Z.-Z.; Yuana, L.; Sheng, R.-L. *Org. Biomol. Chem.*, **2016**, *14*, 9348–9353.
2. Jiang, H.; Liu, B.; Li, Y.; Wang, A.; Huang, H. *Org. Lett.* **2011**, *13*, 1028–1031.
3. Rolfe, A.; Probst, D. A.; Volp, K. A.; Omar, I.; Flynn, D. L.; Hanson, P. R. *J. Org. Chem.* **2008**, *73*, 8785–8790.
4. Mathew, B. P.; Yang, H. J.; Kim, J.; Lee, J. B.; Kim, Y.-T.; Lee, S.; Lee, C. Y.; Choe, W.; Myung, K.; Park, J.-U.; Hong, S. Y. *Angew. Chem. Int. Ed.* **2017**, *56*, 5007–5011.
5. Evans, V.; Mahon, M. F.; Webster, R. L. *Tetrahedron* **2014**, *70*, 7593–7597.
6. Sharma, S.; Park, E.; Park, J.; Kim, I. S. *Org. Lett.*, **2012**, *14*, 906–909.
7. Albert-Sorianoand, M.; Pastor, I. M. *Eur. J. Org. Chem.* **2016**, 5180–5188.
8. Jørgensen, C. G.; Frølund, B.; Kehler, J.; Jensen, A. A. *ChemMedChem* **2011**, *6*, 725–736.
9. Singh, G.; Dada, R.; Yaragorla, S. *Tetrahedron Letters* **2016**, *57*, 4424–4427.
10. Lee, S.-H.; Nikonov, G. I. *Dalton Trans.*, **2014**, *43*, 8888–8893.
11. Kokare, N. D.; Nagawade, R. R.; Rane, V. P.; Shinde, D. B. *Synthesis* **2007**, *5*, 766–772.
12. Pham, V.-T.; Joo, J.-E.; Lee, K.-Y.; Kim, T.-W.; Mu, Y.; Ham, W.-H. *Tetrahedron* **2010**, *66*, 2123–2131.
13. You, T. J.; Wang, Z. R.; Chen, J. J.; Xia, Y. Z. *J. Org. Chem.* **2017**, *82*, 1340–1346.
14. Xu, X. J.; Feng, H. D.; Huang, L. L.; Liu, X. H. *J. Org. Chem.* **2018**, *83*, 7962–7969.
15. Bahde, R. J.; Appella, D. H.; Trenkle, W. C. *Tetrahedron Letters* **2011**, *52*, 4103–4105.
16. Huy, P. H.; Motsch, S.; Kappler, S. M. *Angew. Chem. Int. Ed.* **2016**, *55*, 10145–10149.
17. Ellsworth, A. A.; Magyar, C. L.; Hubbell, G. E.; Theisen, C. C.; Holmes, D.; Mosey, R. A. *Tetrahedron* **2016**, *72*, 6380–6389.
18. Pouliot, M.-F.; Mahé, O.; Hamel, J.-D.; Desroches, J.; Paquin, J.-F. *Org. Lett.*, **2012**, *14*, 5428–5431.
19. Smith, R. T.; Zhang, X.; Rincon, J. A.; Agejas, J.; Mateos, C.; Barberis, M.; García-Cerrada, S.; de Frutos, O.; MacMillan, D. W. C. *J. Am. Chem. Soc.* **2018**, *140*, 17433–17438.
20. Hemming, D. S.; Talbot, E. P.; Steel, P. G. *Tetrahedron Letters* **2017**, *58*, 17–20.
21. Singh, G.; Dada, R.; Yaragorla, S. *Tetrahedron Letters* **2016**, *57*, 4424–4427.
22. Halima, T. B.; Vandavasi, J. K.; Shkoor, M.; Newman, S. G. *ACS Catal.* **2017**, *7*, 2176–2180.
23. Kitamura, M.; Sasaki, S.; Nishikawa, R.; Yamada, K.; Kunishima, M. *RSC Adv.*, **2018**, *8*, 22482–22489.



### 3,4-Dichloro-N-isopropylbenzamide (2g)

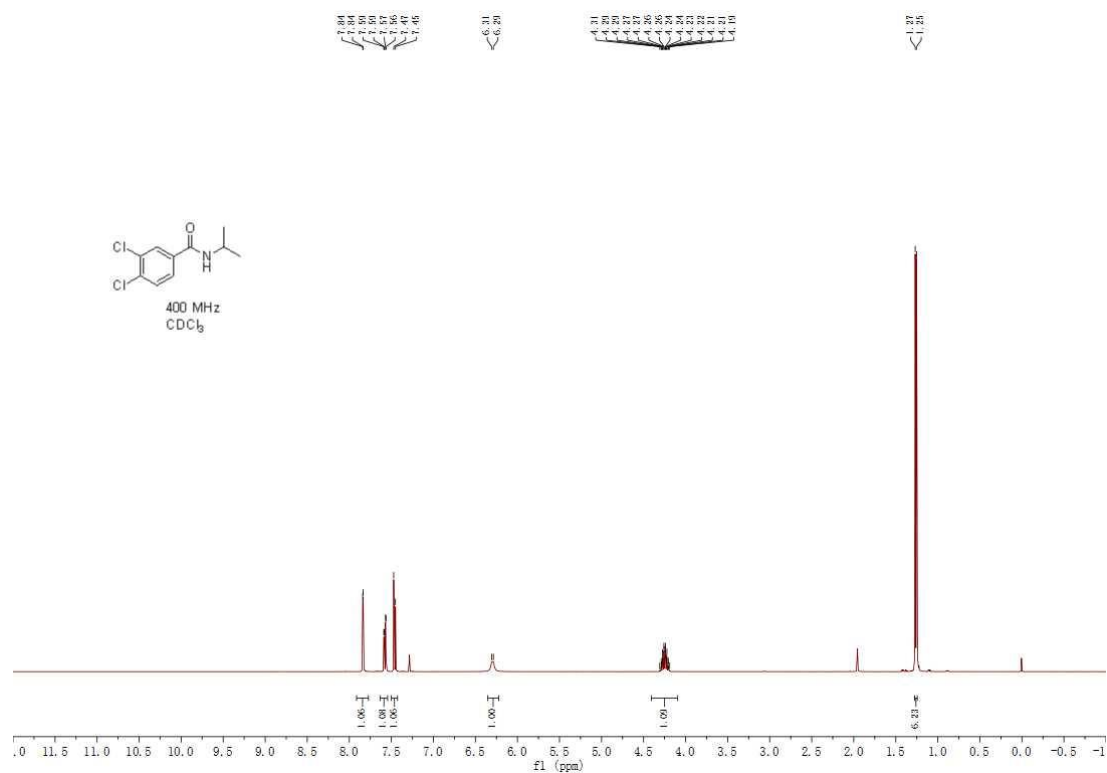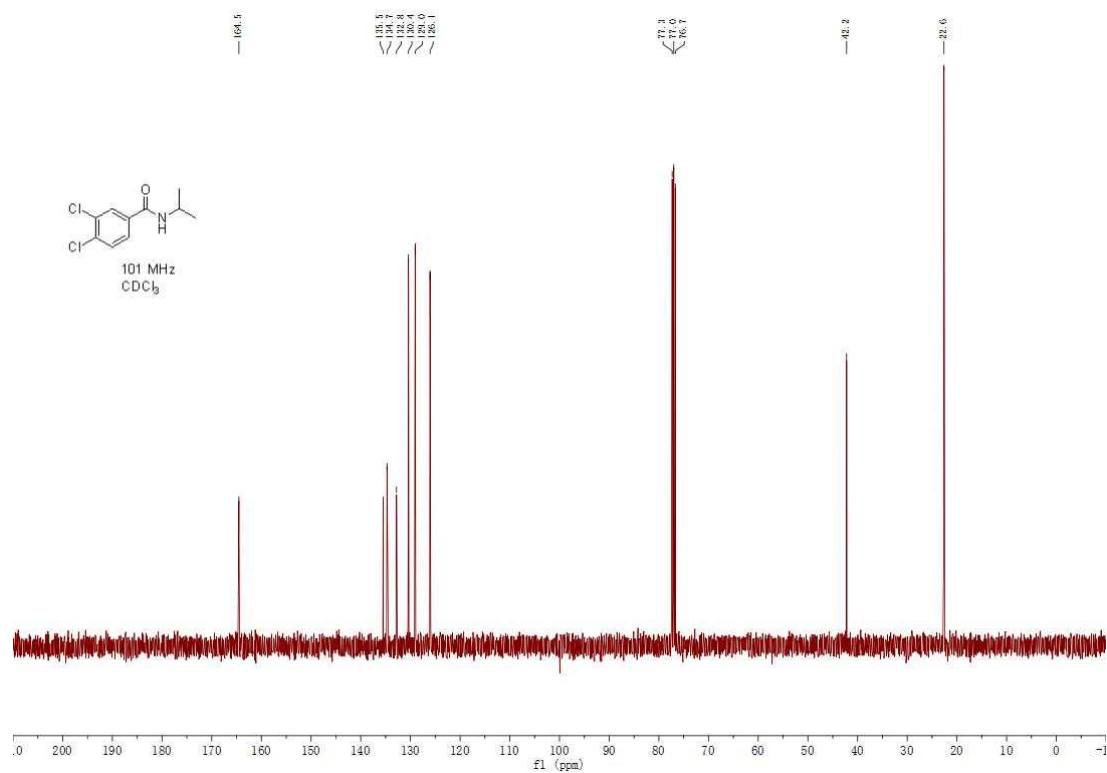

### 3-Bromo-*N*-isopropylbenzamide (2i)

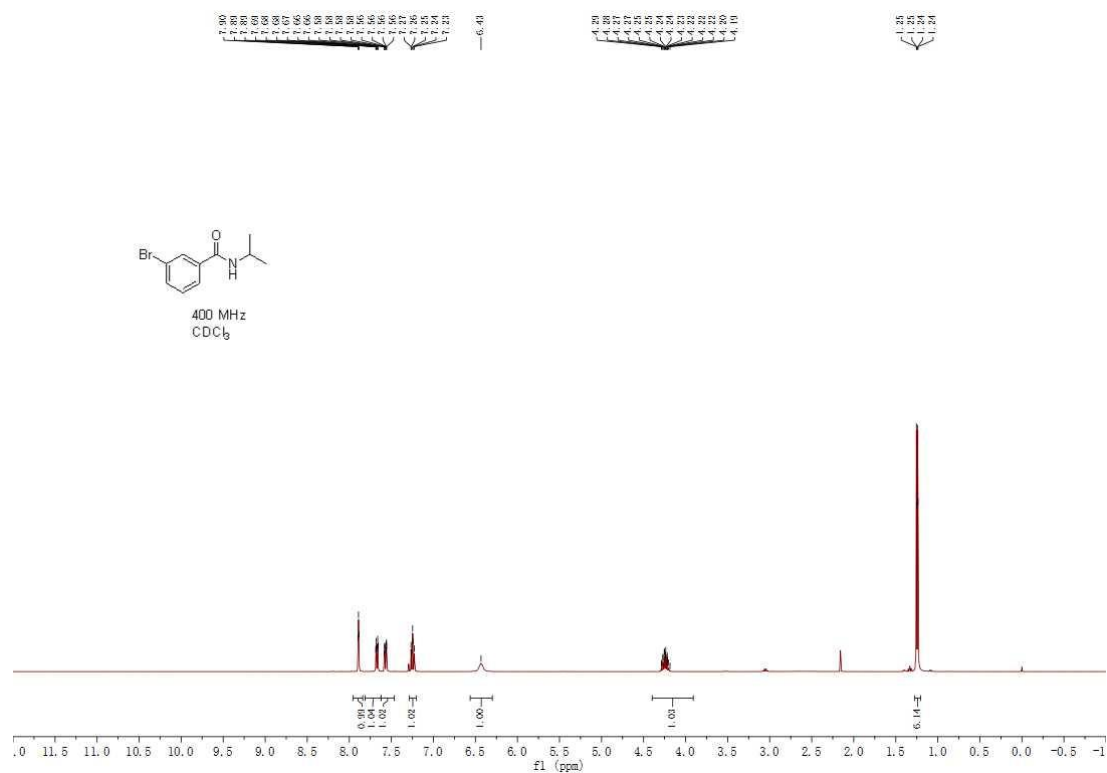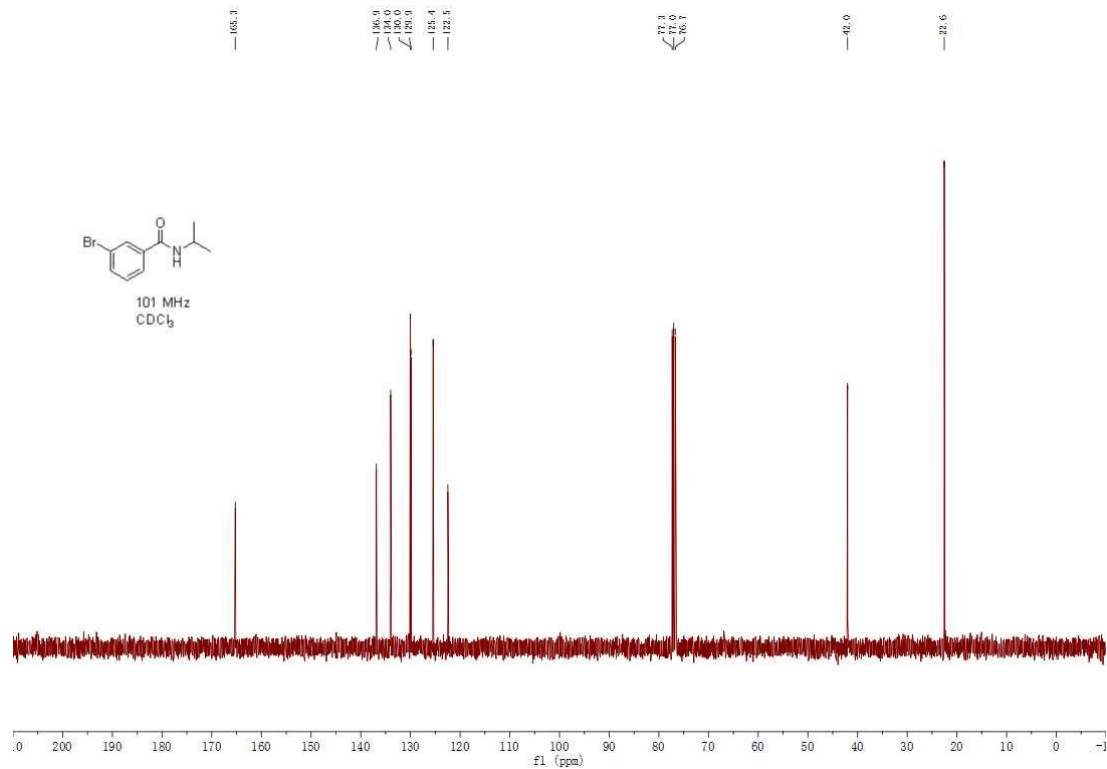

[illegible]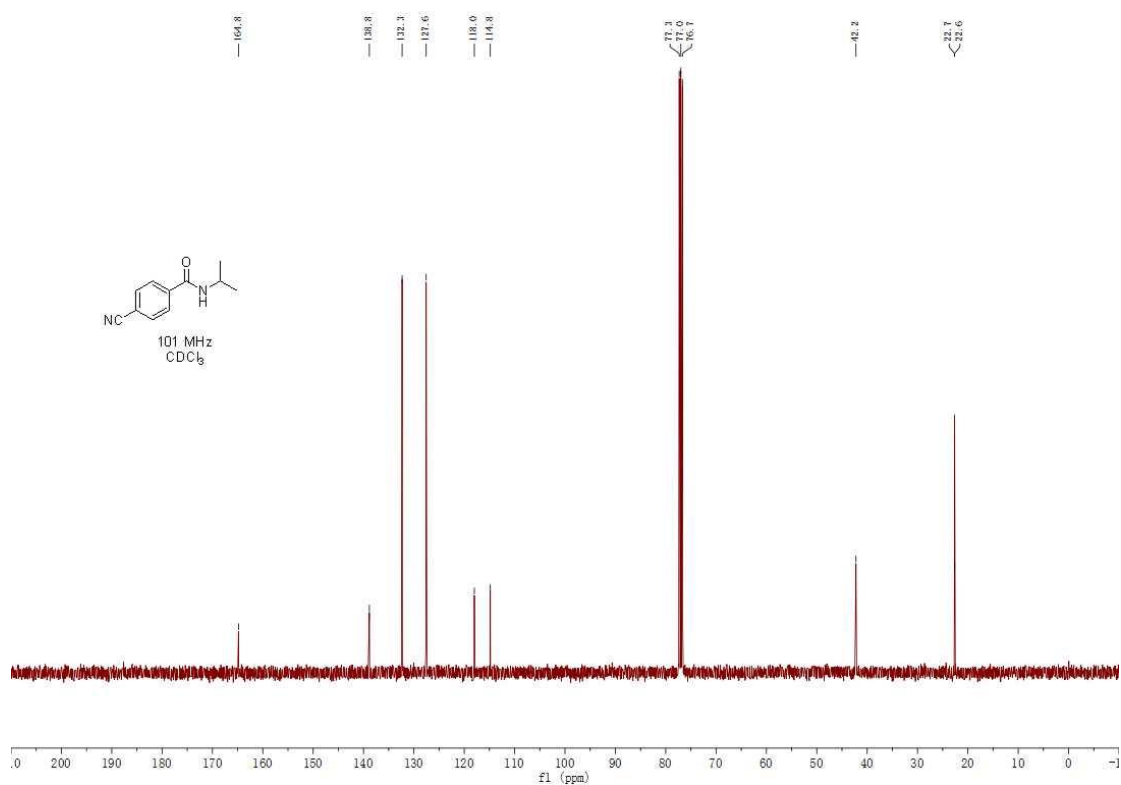

**(*E*)-*N*-Isopropyl-4-(phenyldiazenyl)benzamide (2m)**

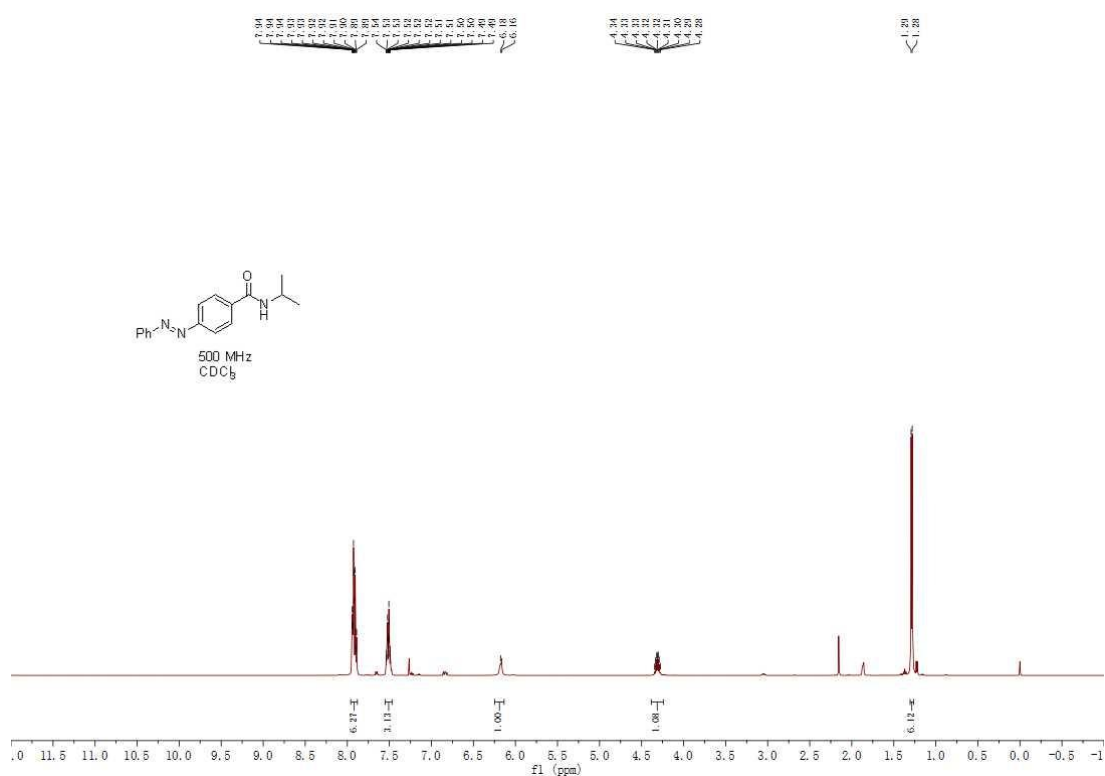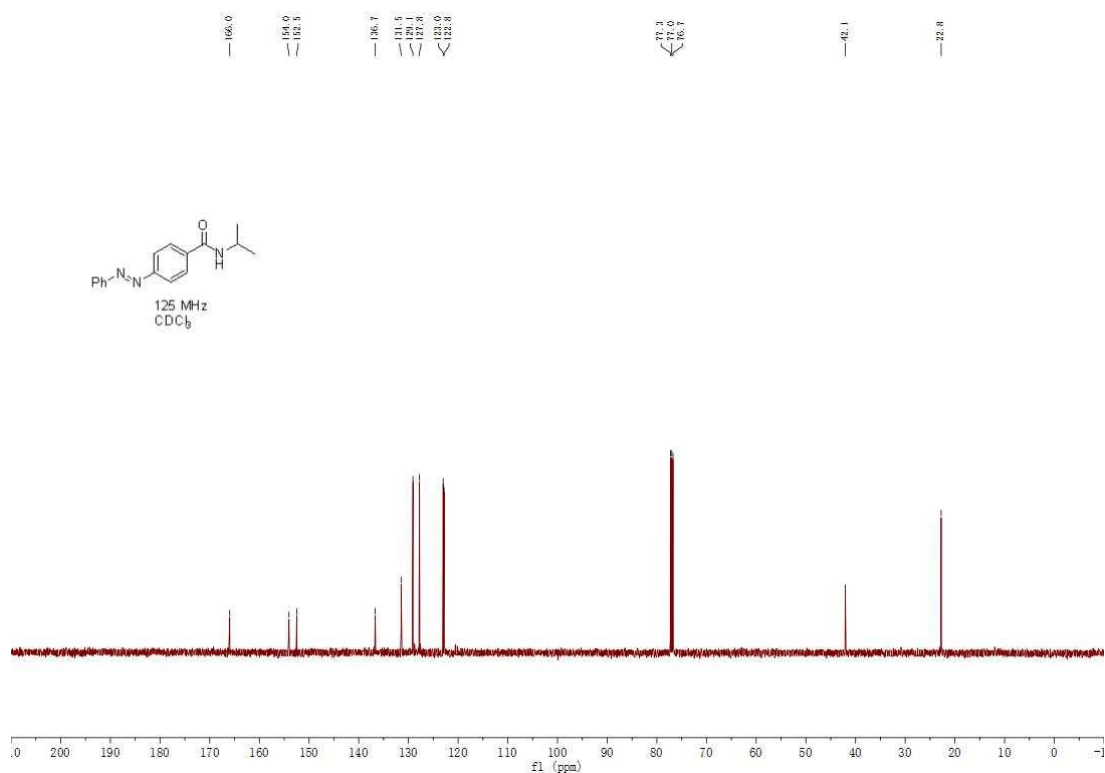

CC(C)NC(=O)c1ccc(cc1)C(=O)C

500 MHz  
 CDCl<sub>3</sub>

7.82  
 7.78  
 7.28  
 6.01  
 4.35  
 2.63  
 1.29  
 0.00

2.00  
 2.00  
 1.00  
 1.00  
 1.00  
 3.00  
 6.00

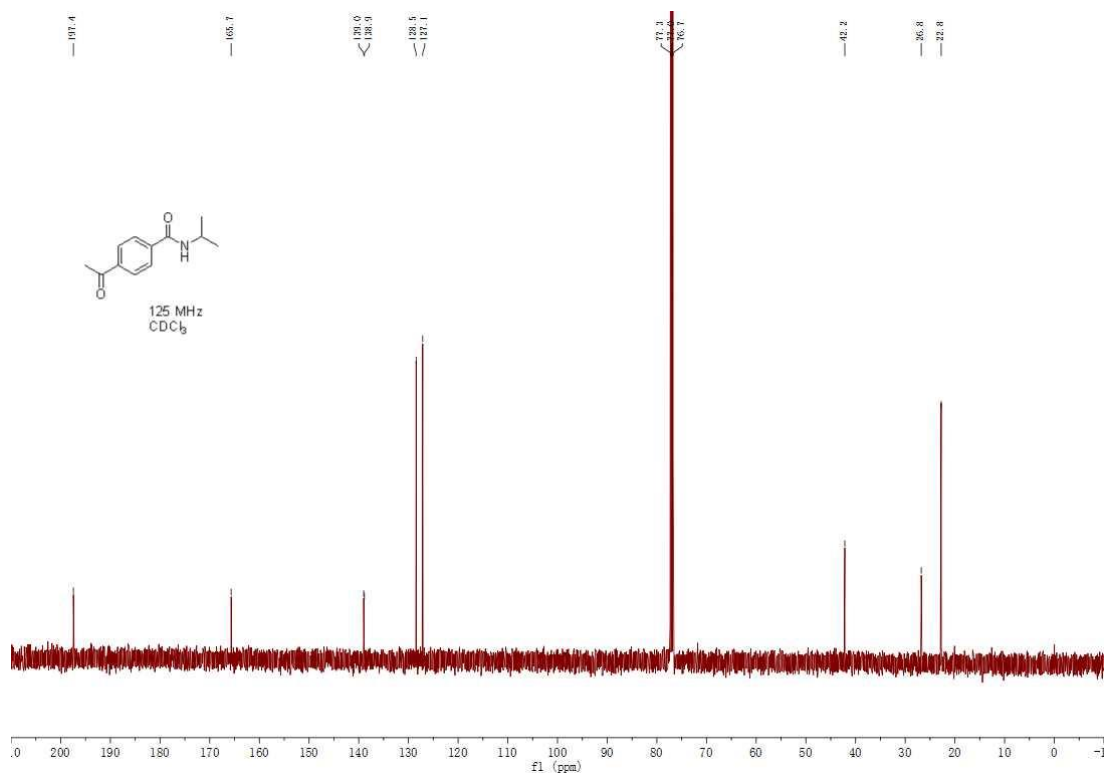

CC(C)C(=O)Nc1ccccc1  
 400 MHz  
 CDCl<sub>3</sub>

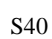



# Diethyl (cyano(isopropylamino)(phenyl)methyl)phosphonate (1a)

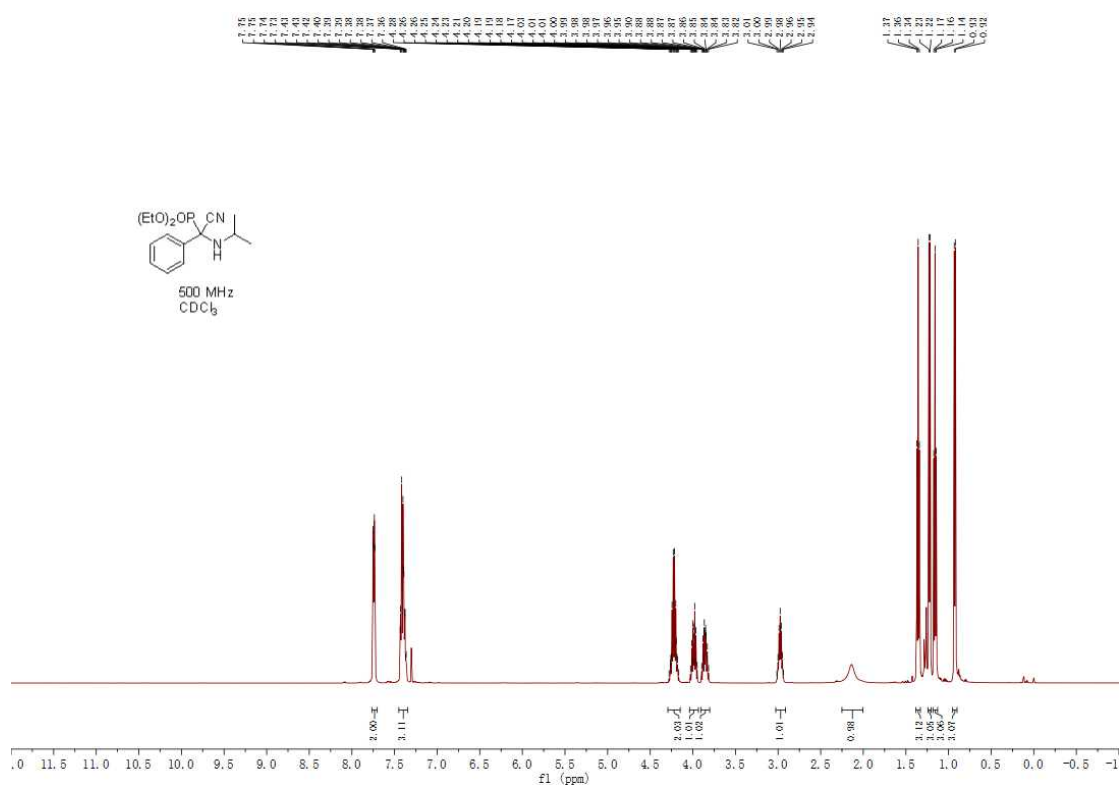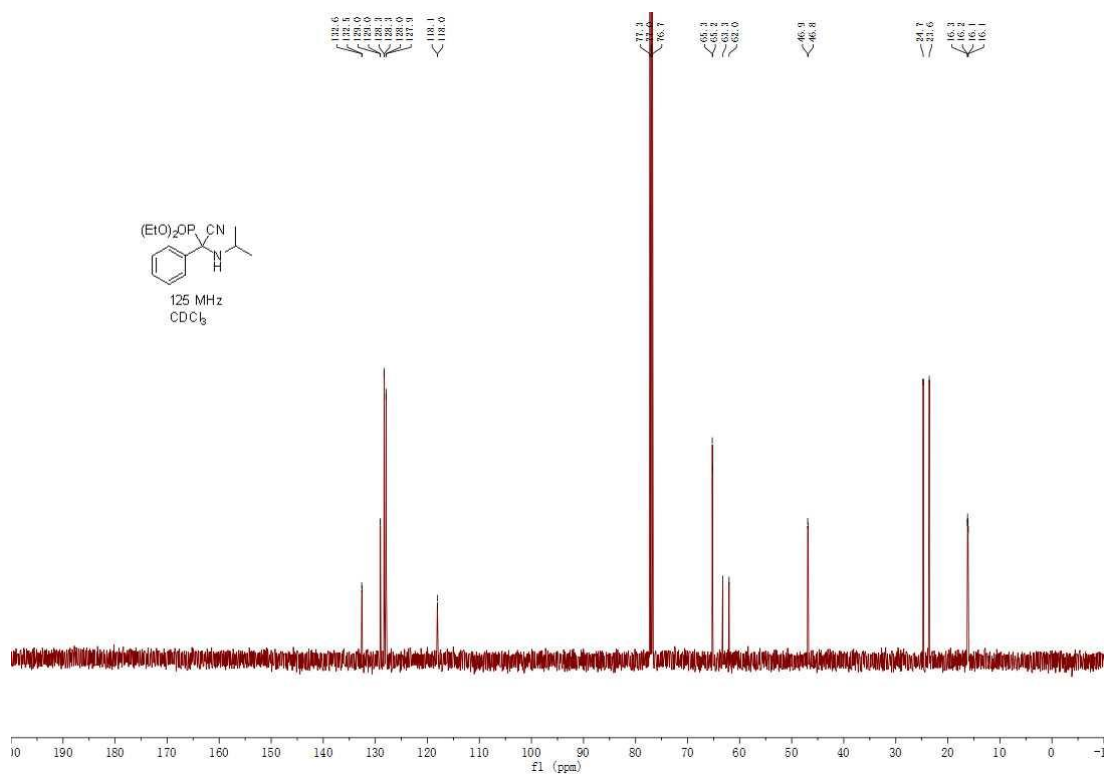

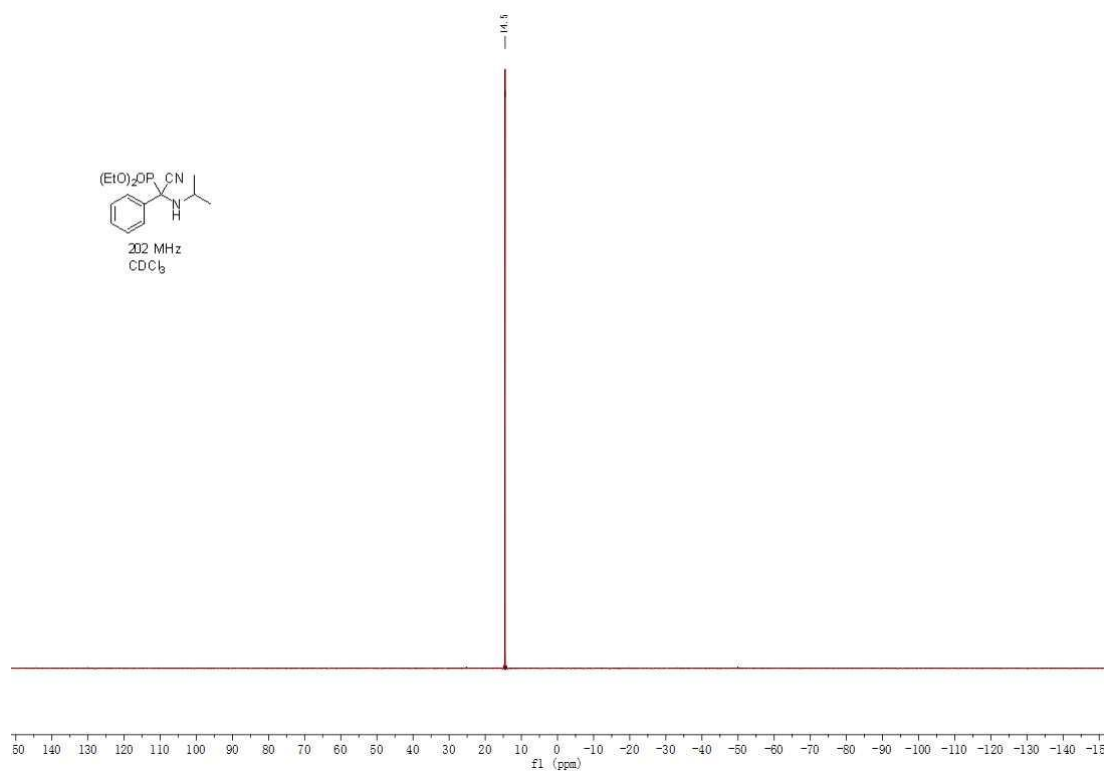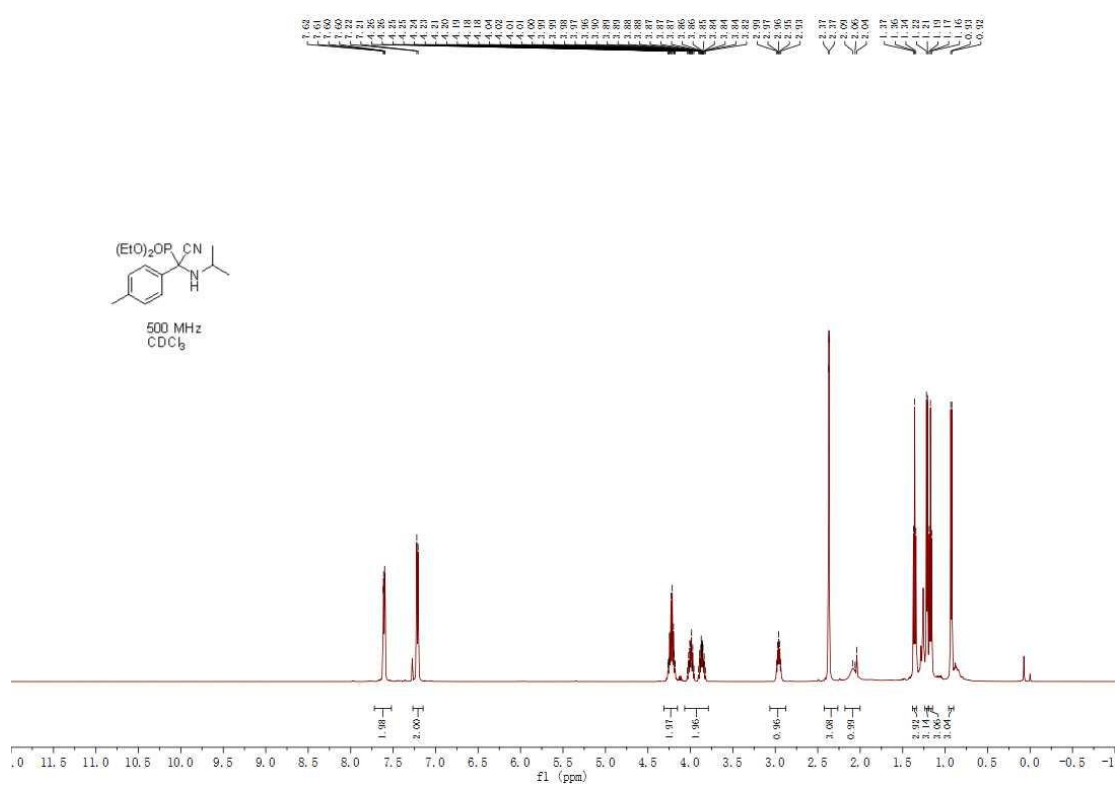

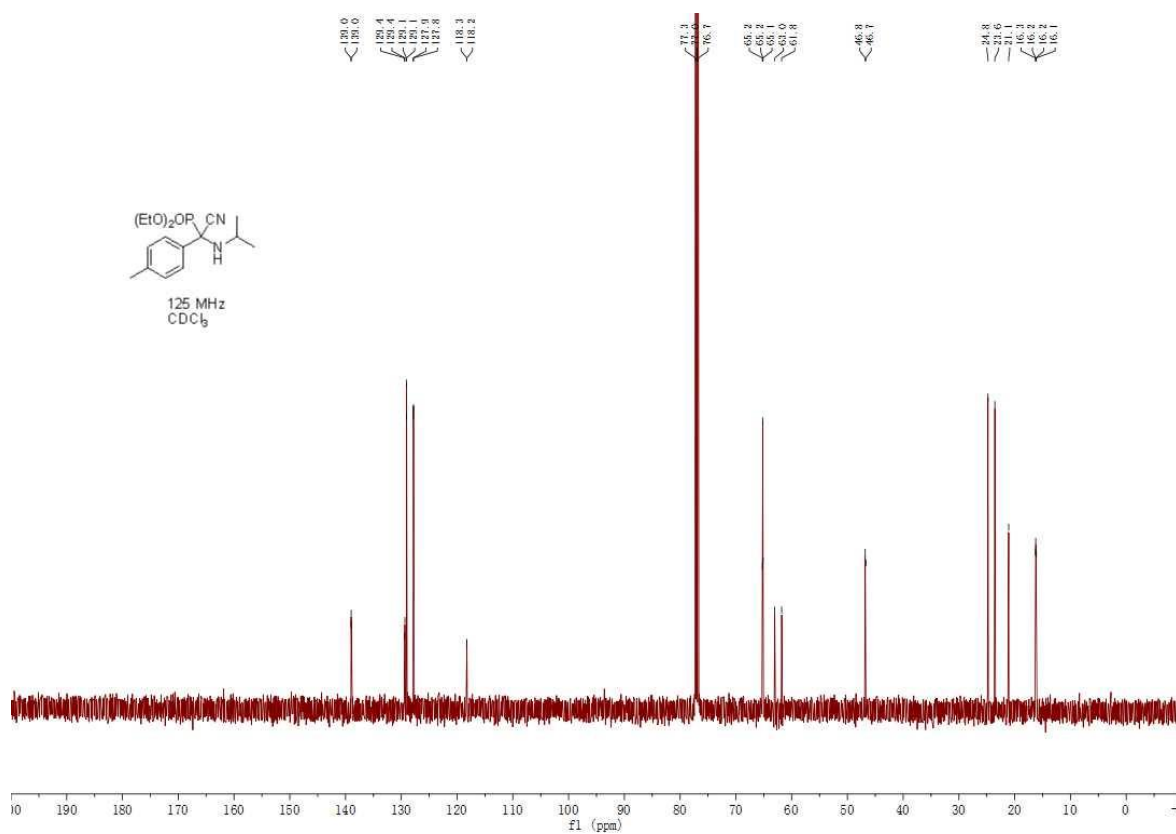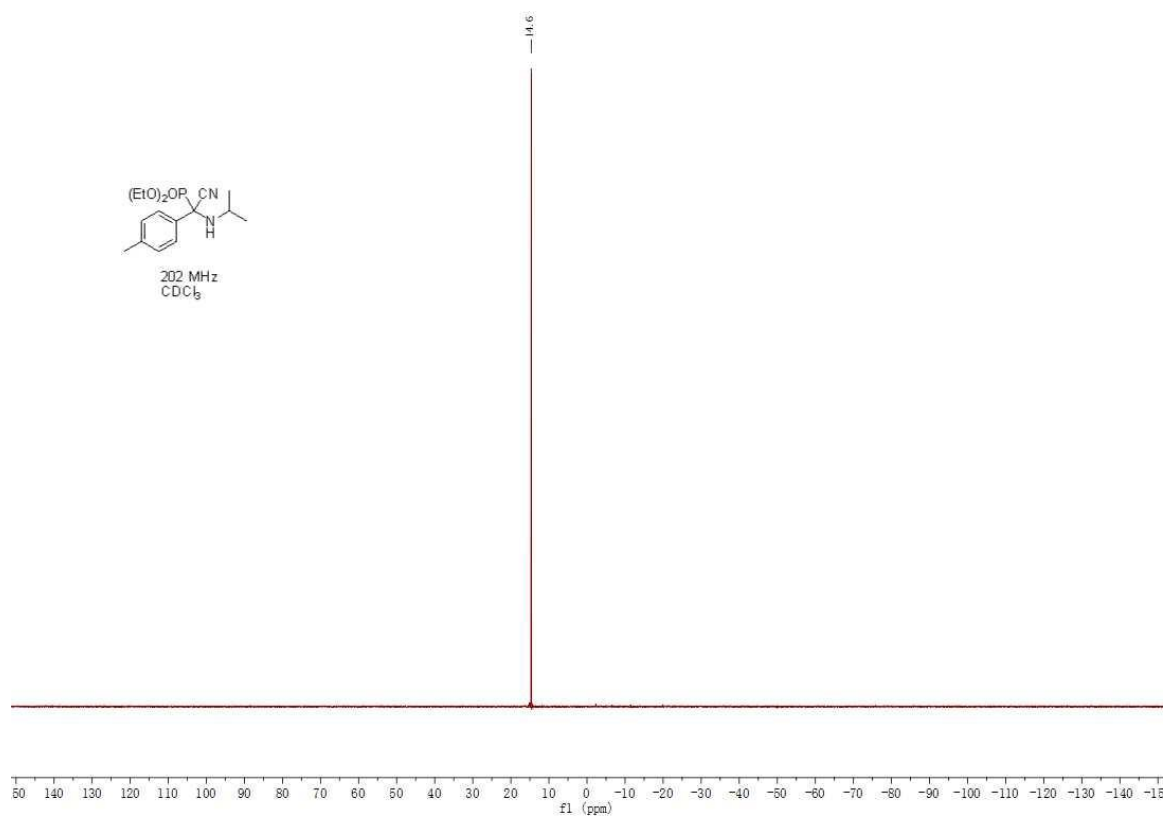

# Diethyl (cyano(isopropylamino)(o-tolyl)methyl)phosphonate (1c)

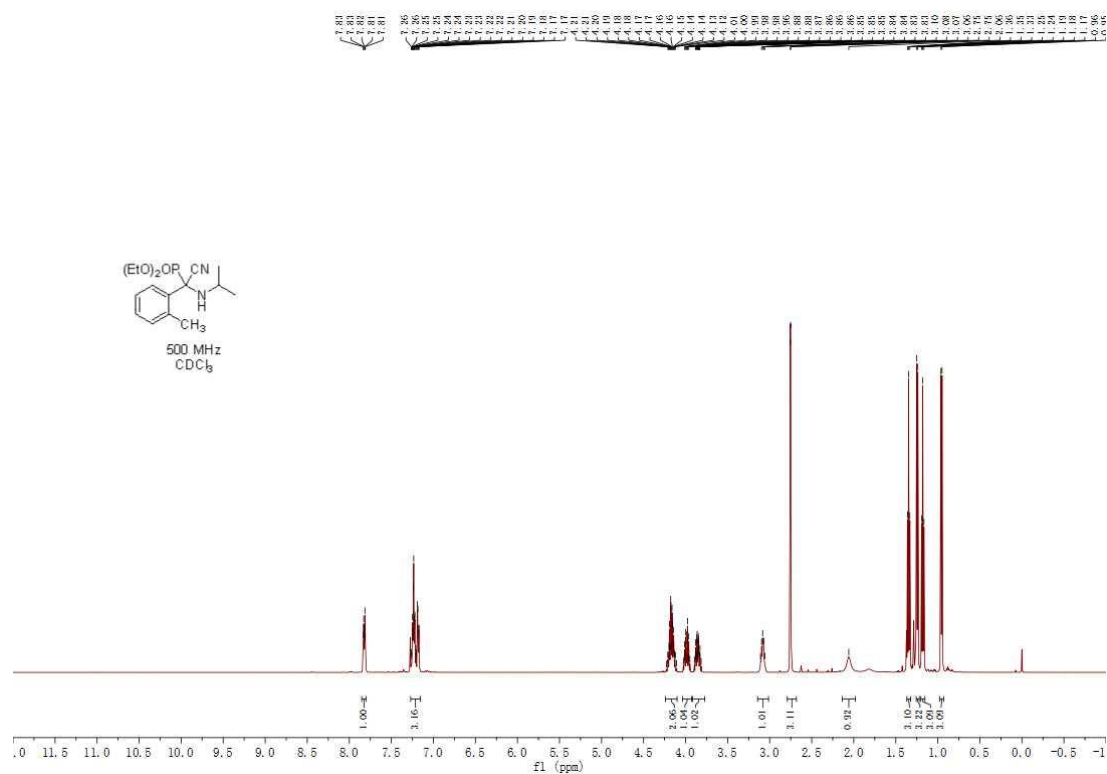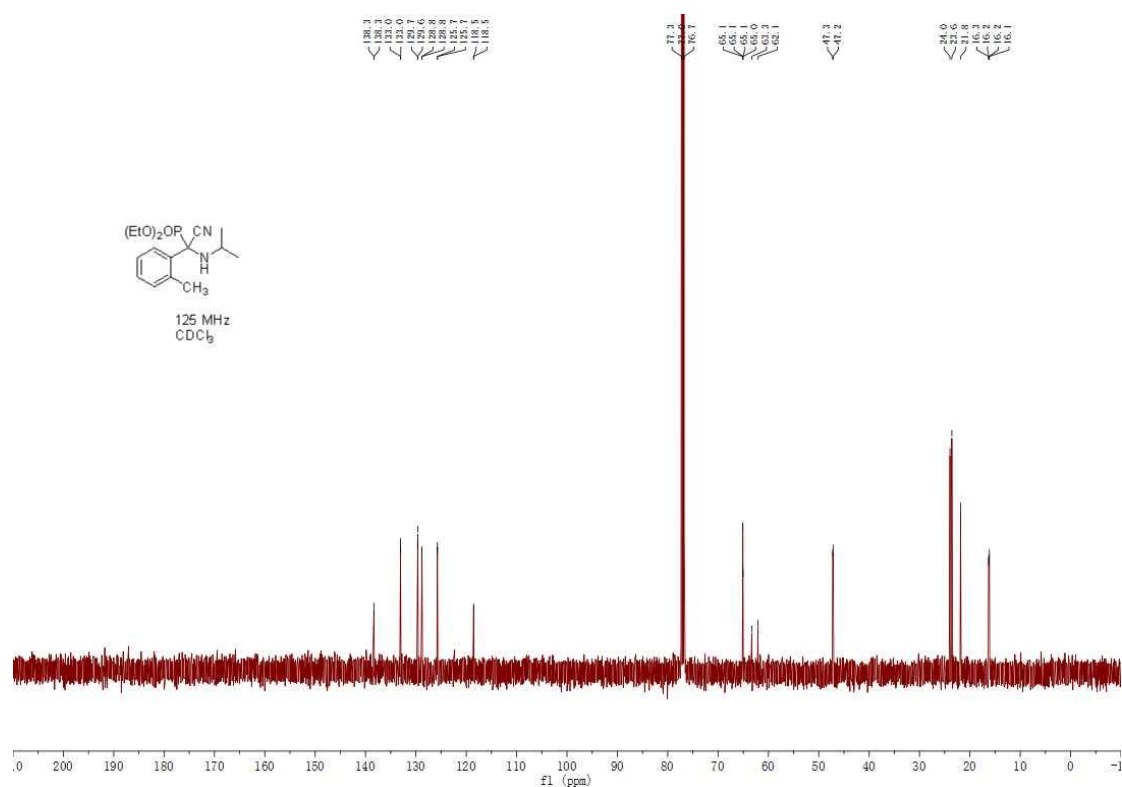

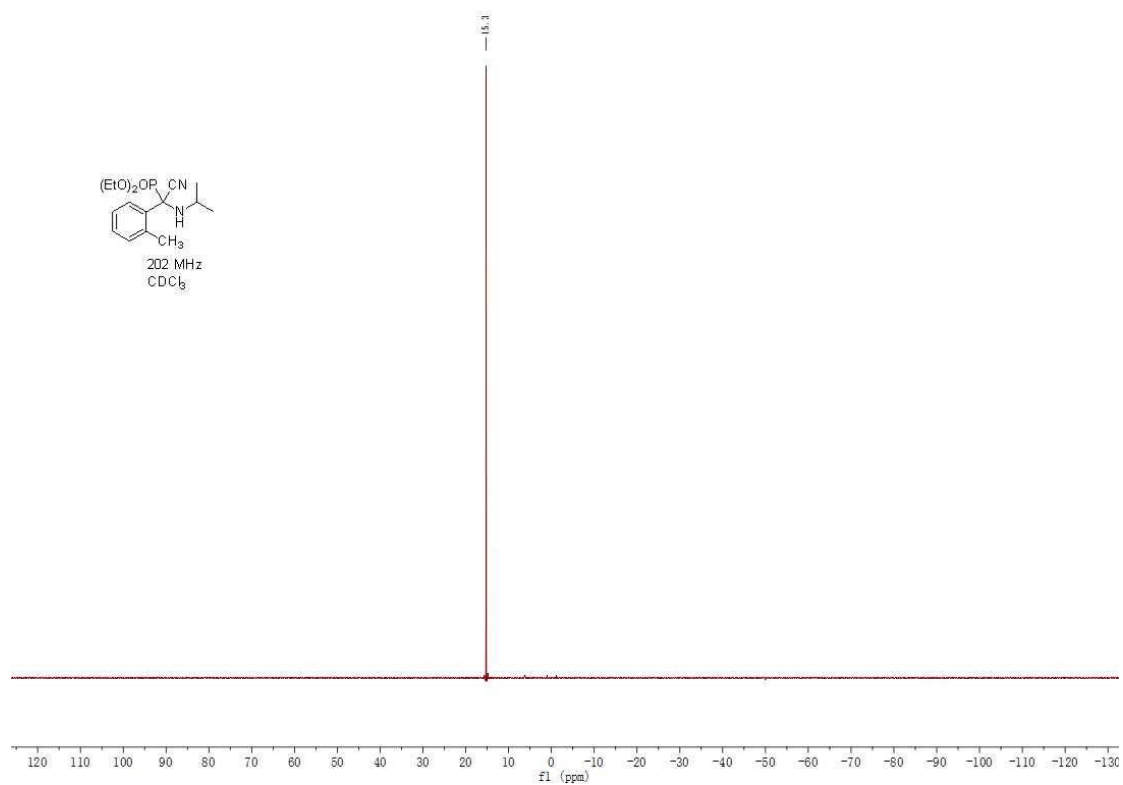

### Diethyl (cyano(isopropylamino)(4-methoxyphenyl)methyl)phosphonate (1d)

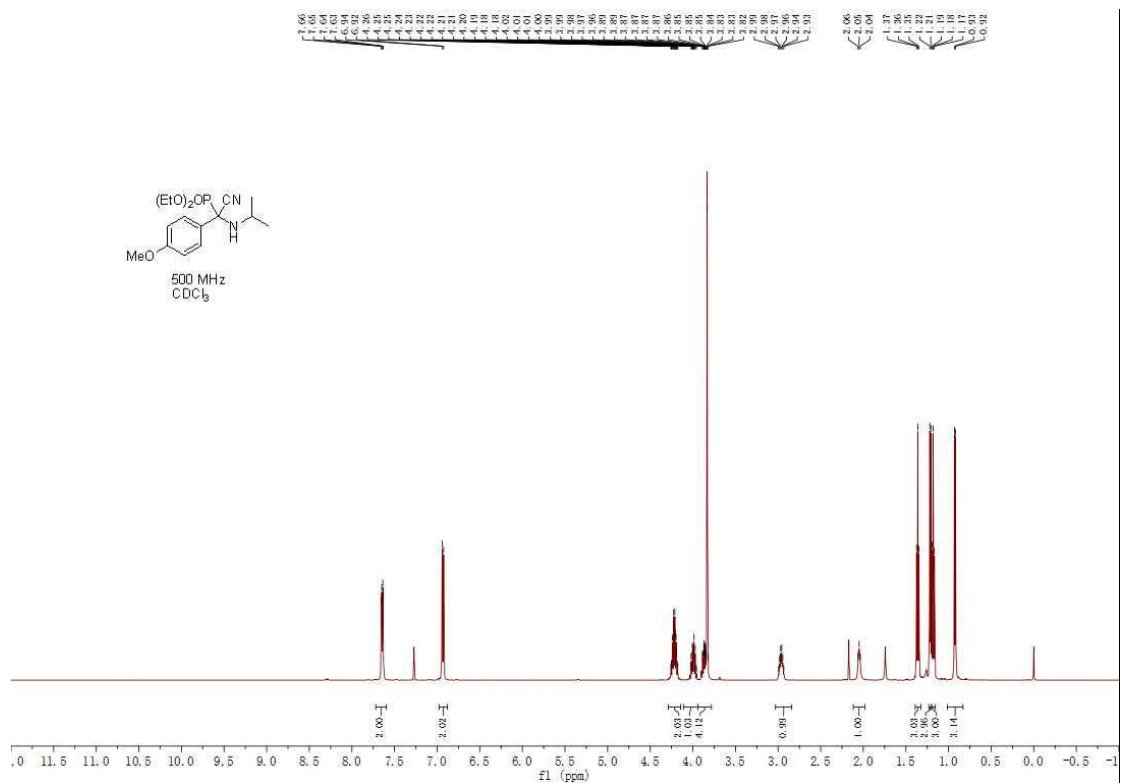

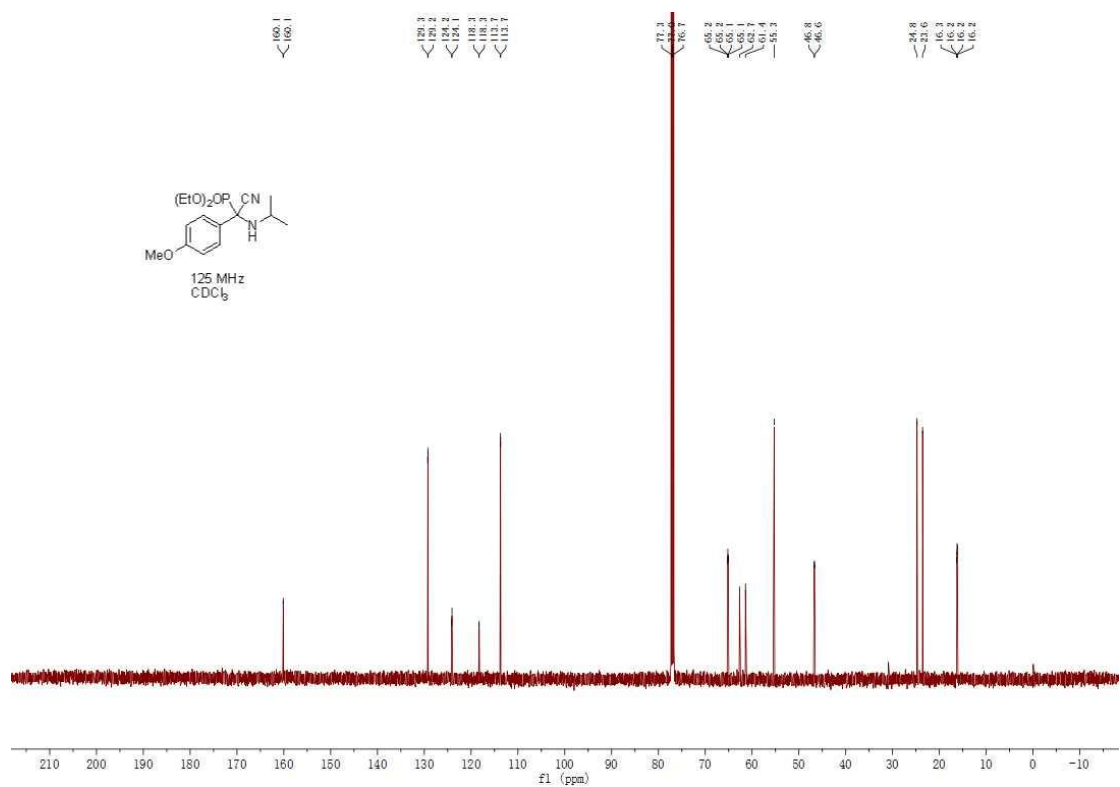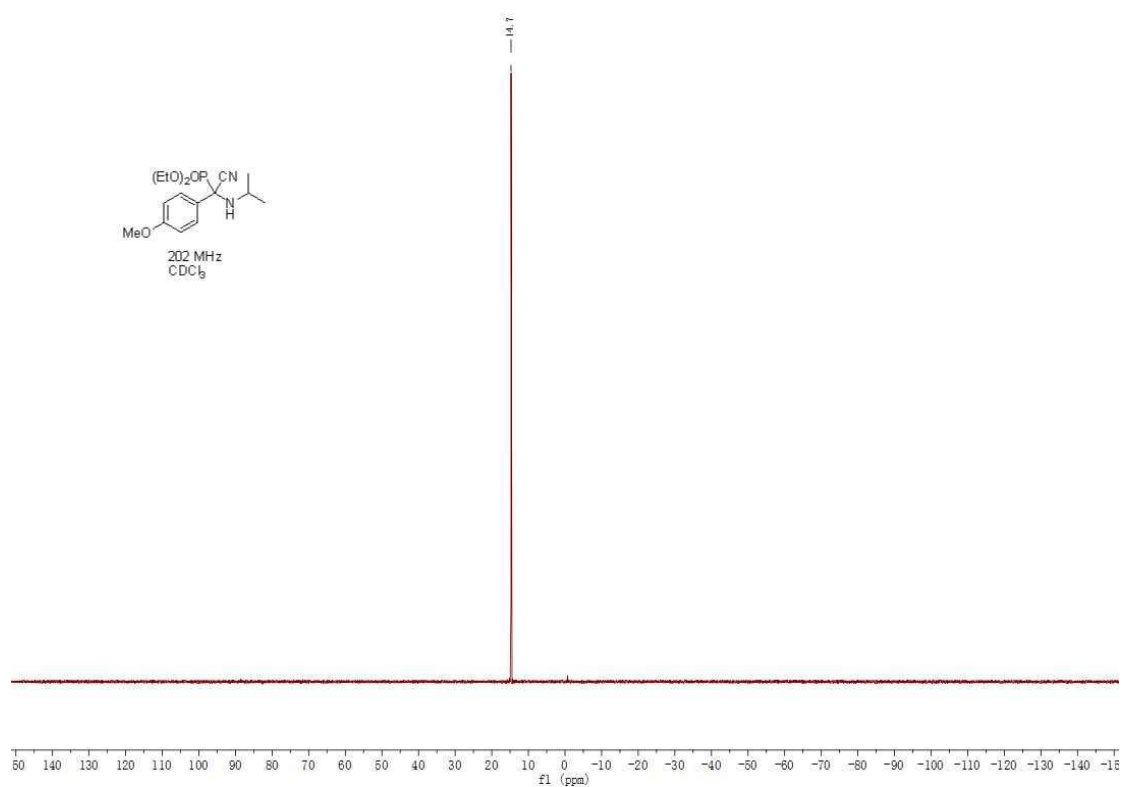

[illegible]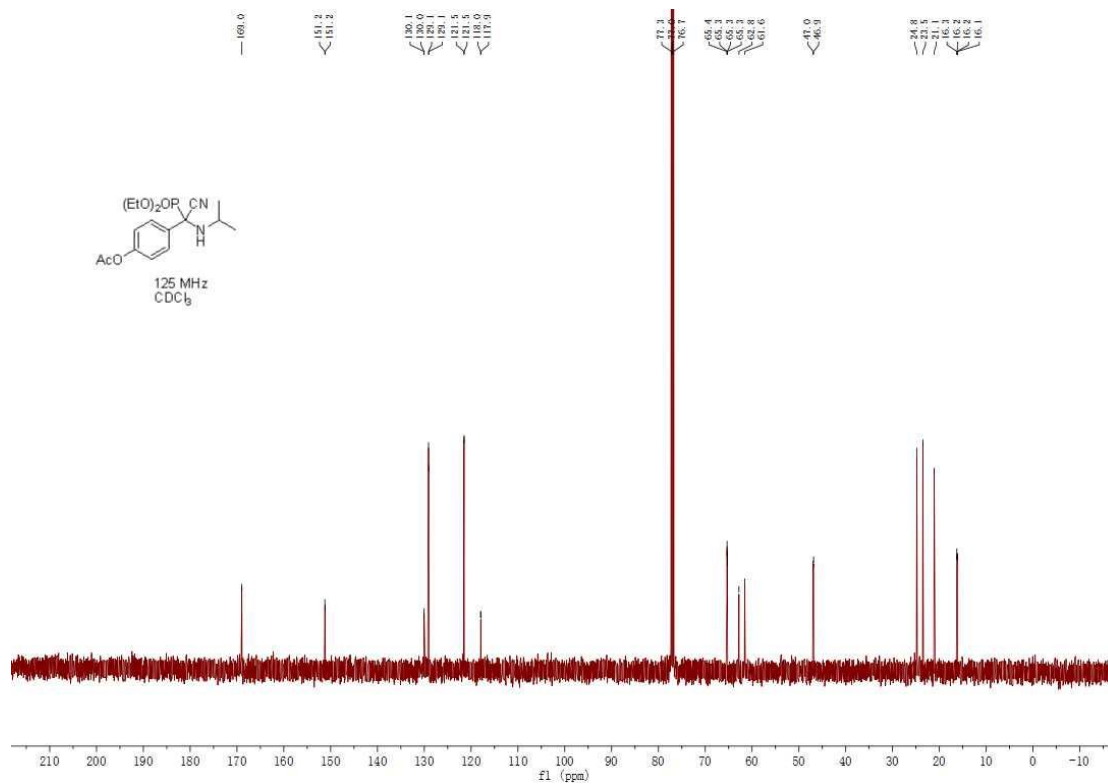

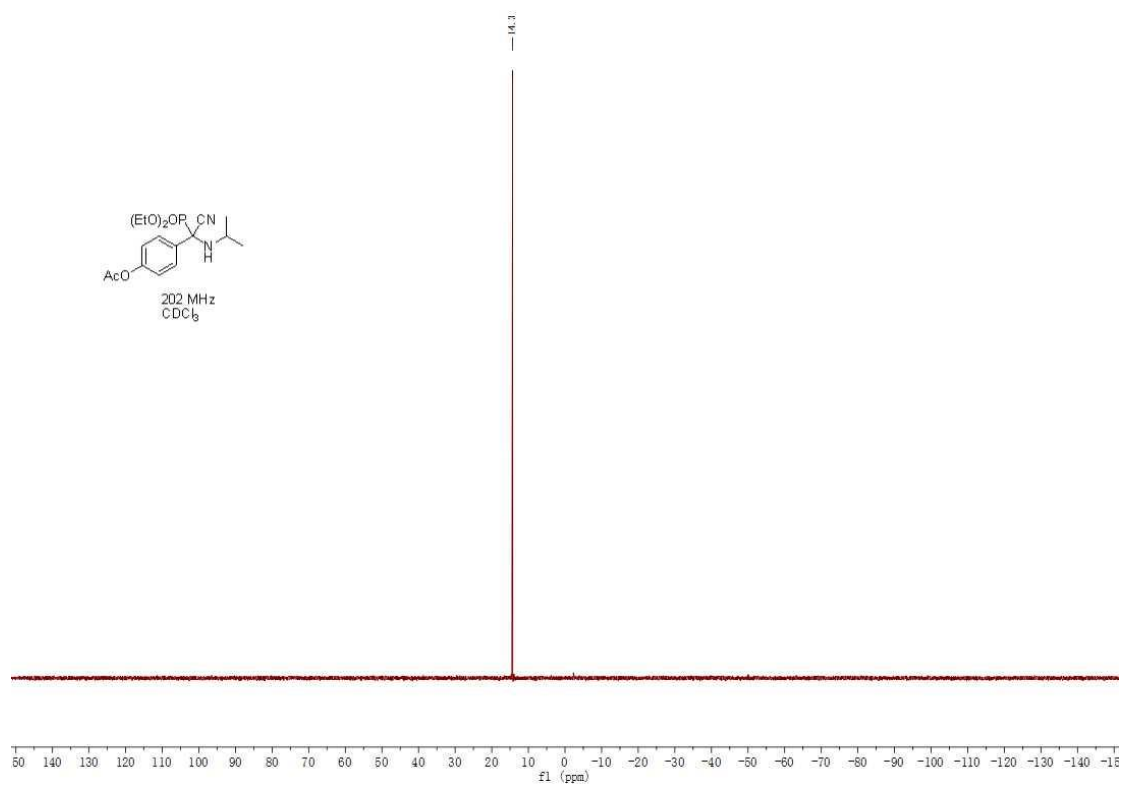

### Diethyl ((4-chlorophenyl)(cyano)(isopropylamino)methyl)phosphonate (1f)

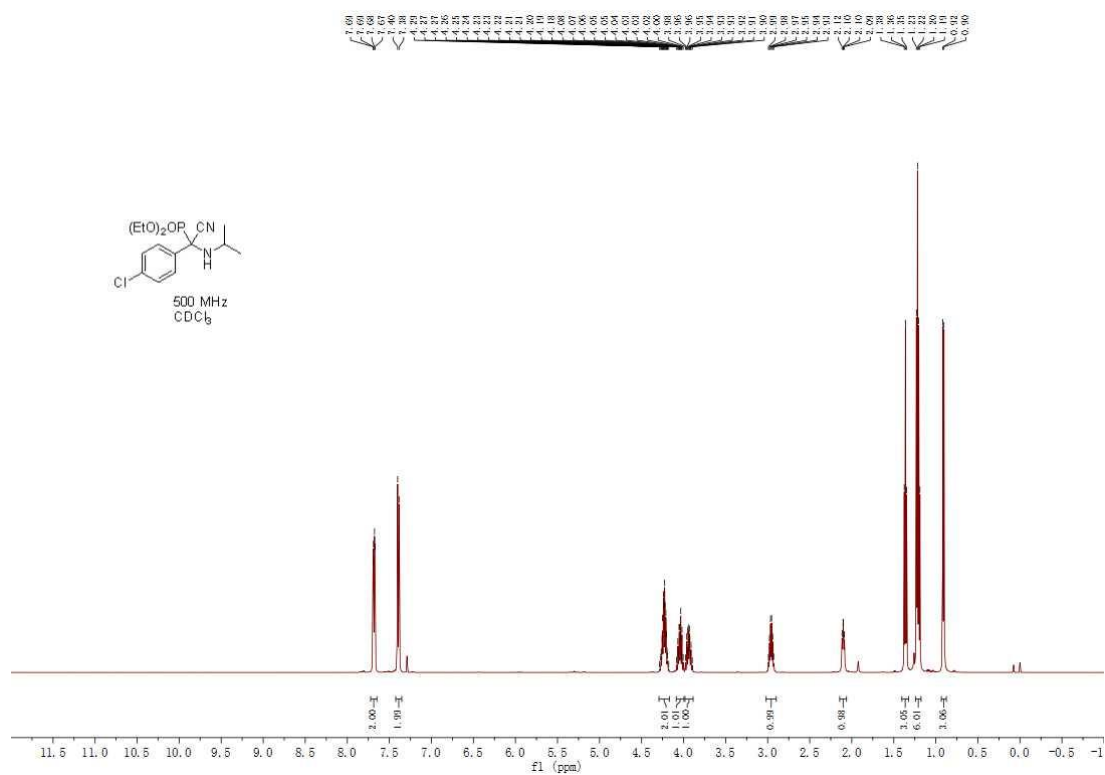



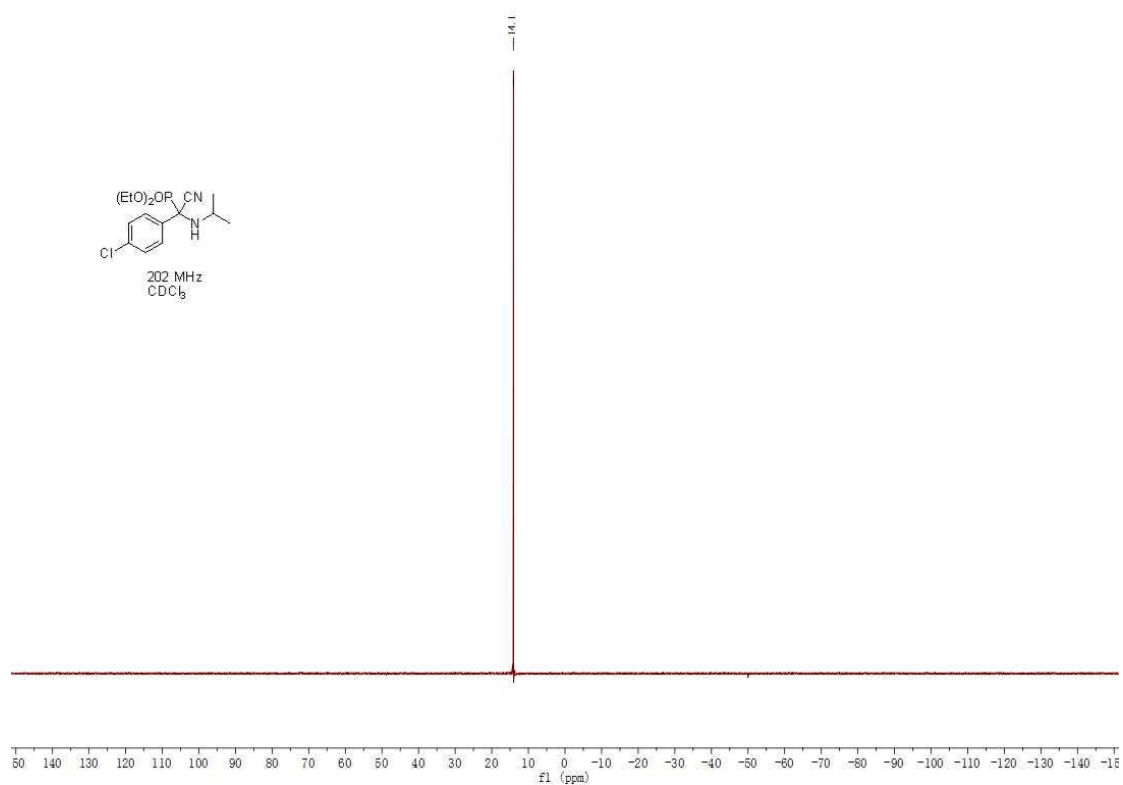

CC(C)NC(C#N)(COP(=O)(OCC)OCC)c1ccc(Cl)c(Cl)c1  
 500 MHz  
 CDCl<sub>3</sub>

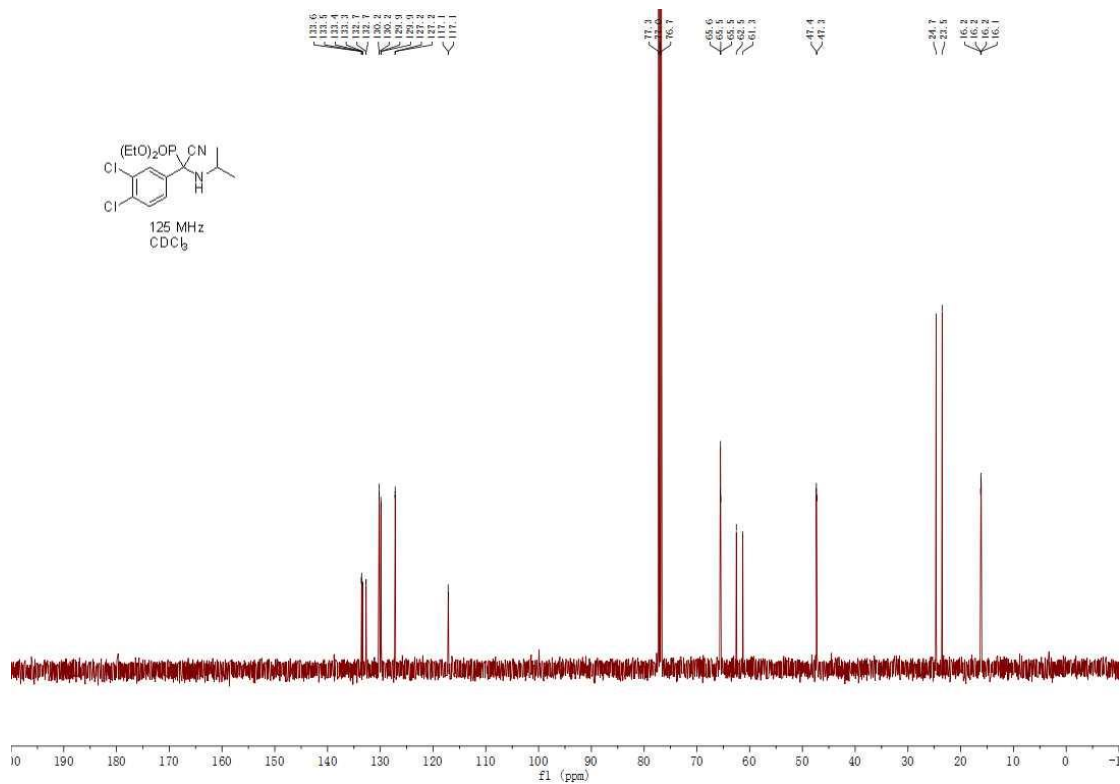

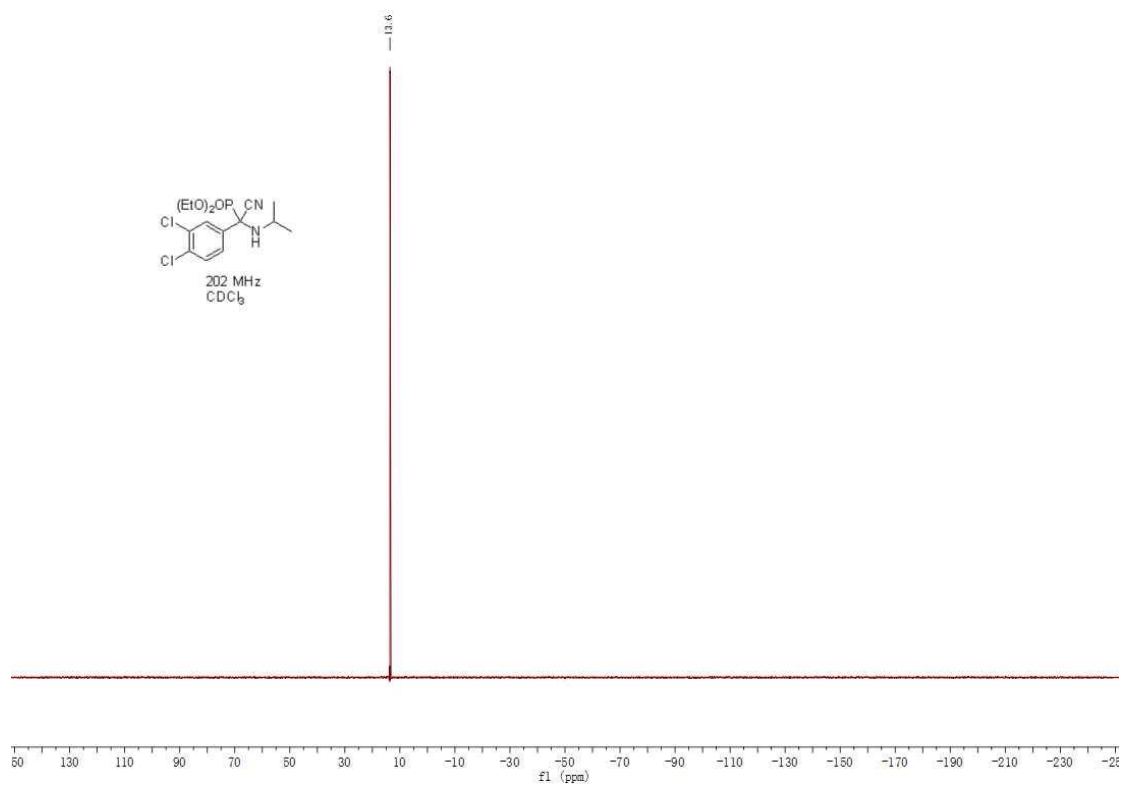

## Diethyl ((2-chlorophenyl)(cyano)(isopropylamino)methyl)phosphonate (1h)

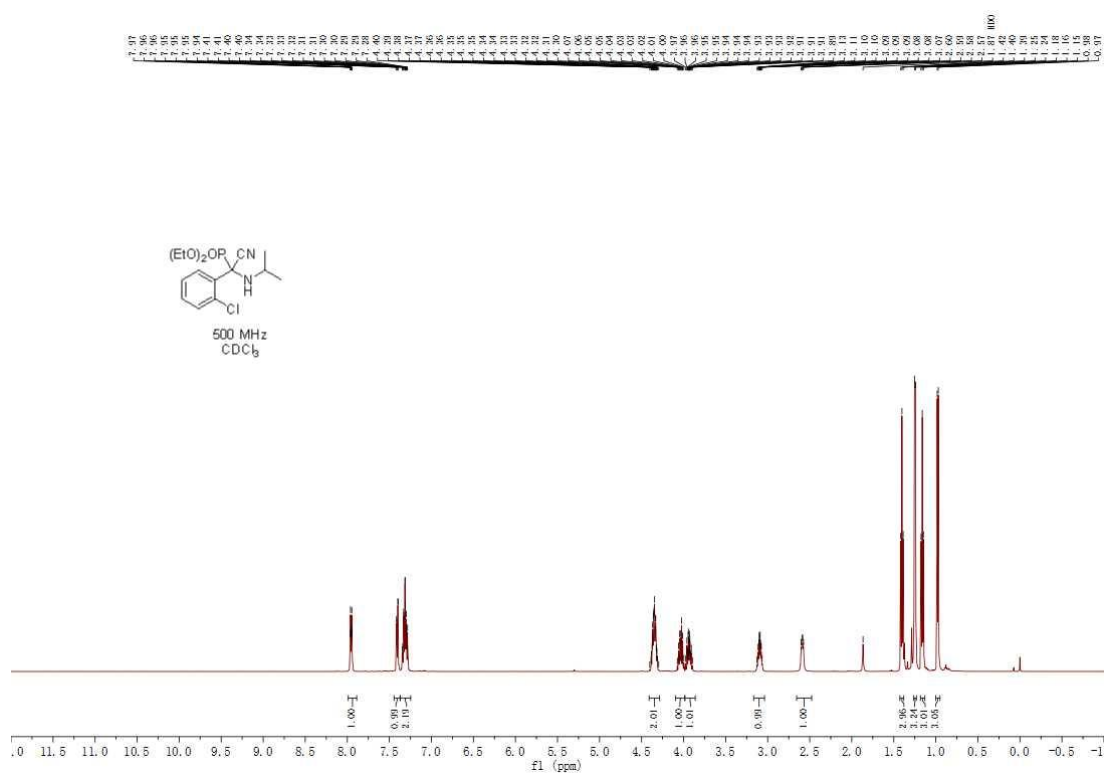

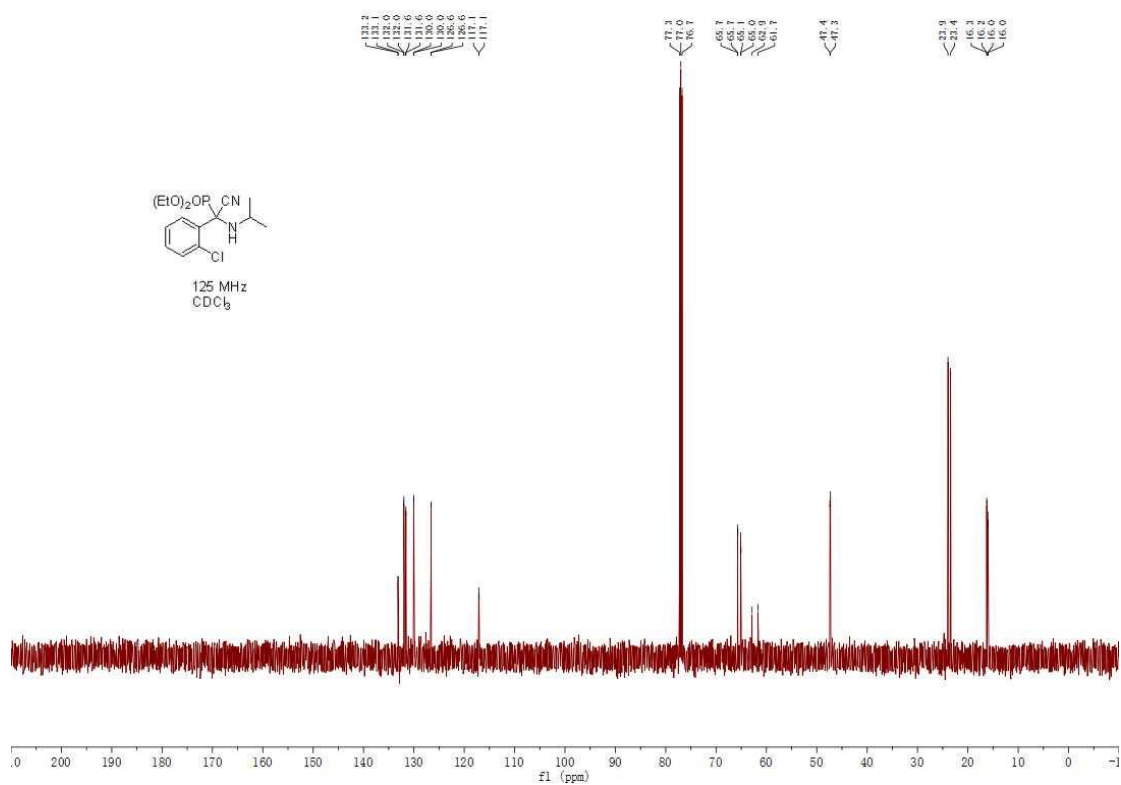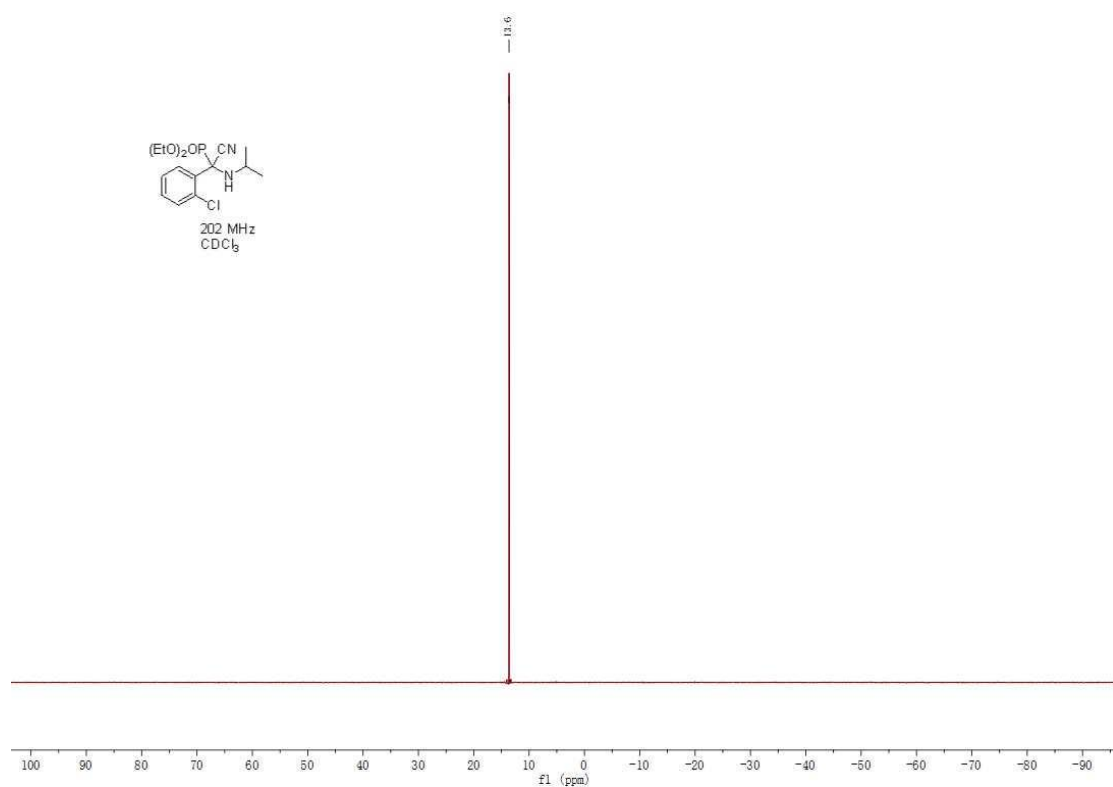

# Diethyl ((3-bromophenyl)(cyano)(isopropylamino)methyl)phosphonate (1i)

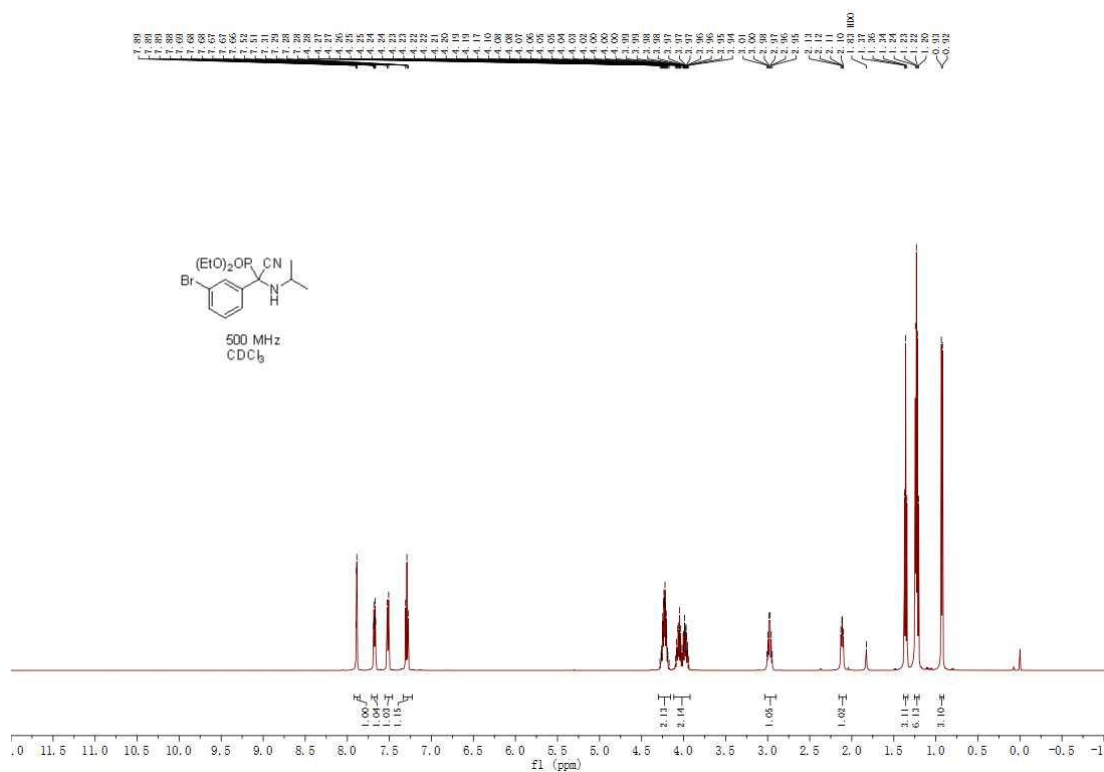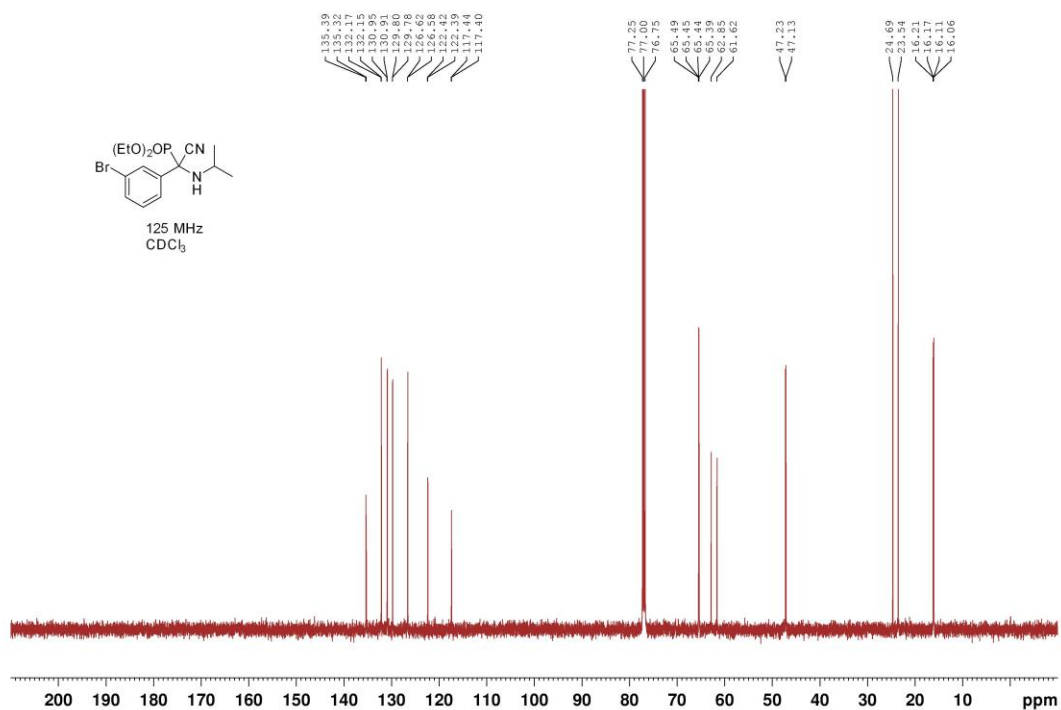

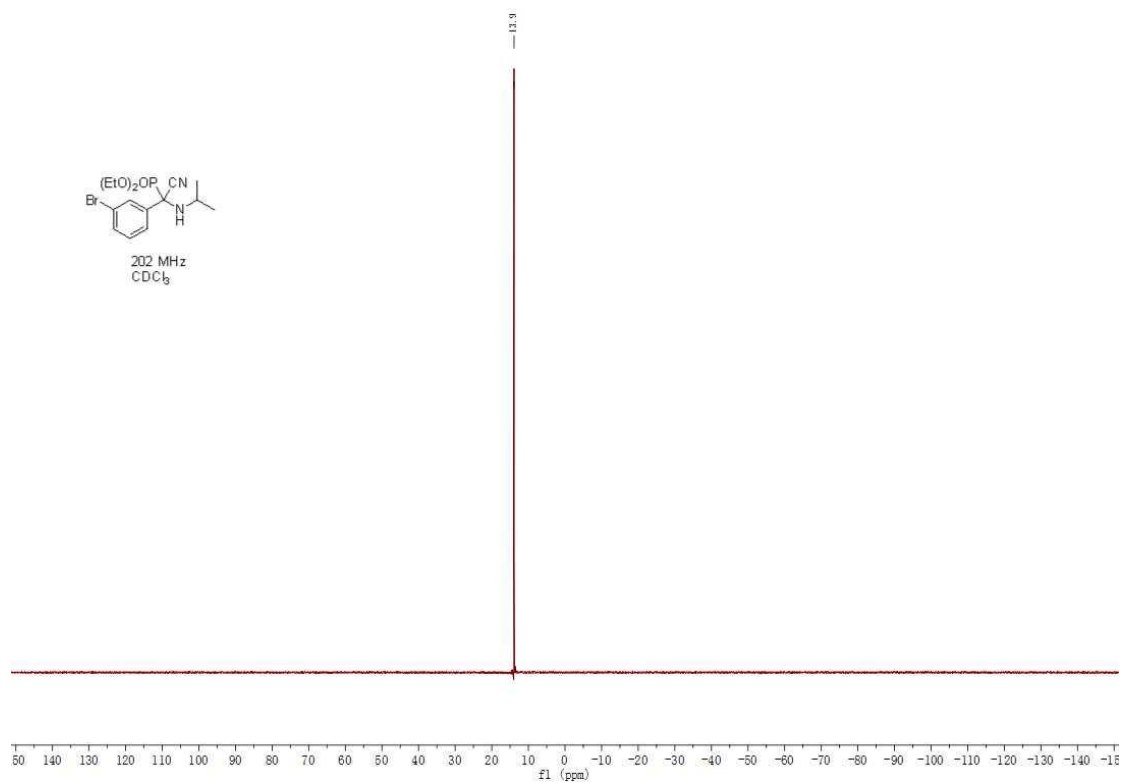

**Diethyl (cyano(isopropylamino)(4-(trifluoromethyl)phenyl)methyl)phosphonate  
(1j)**

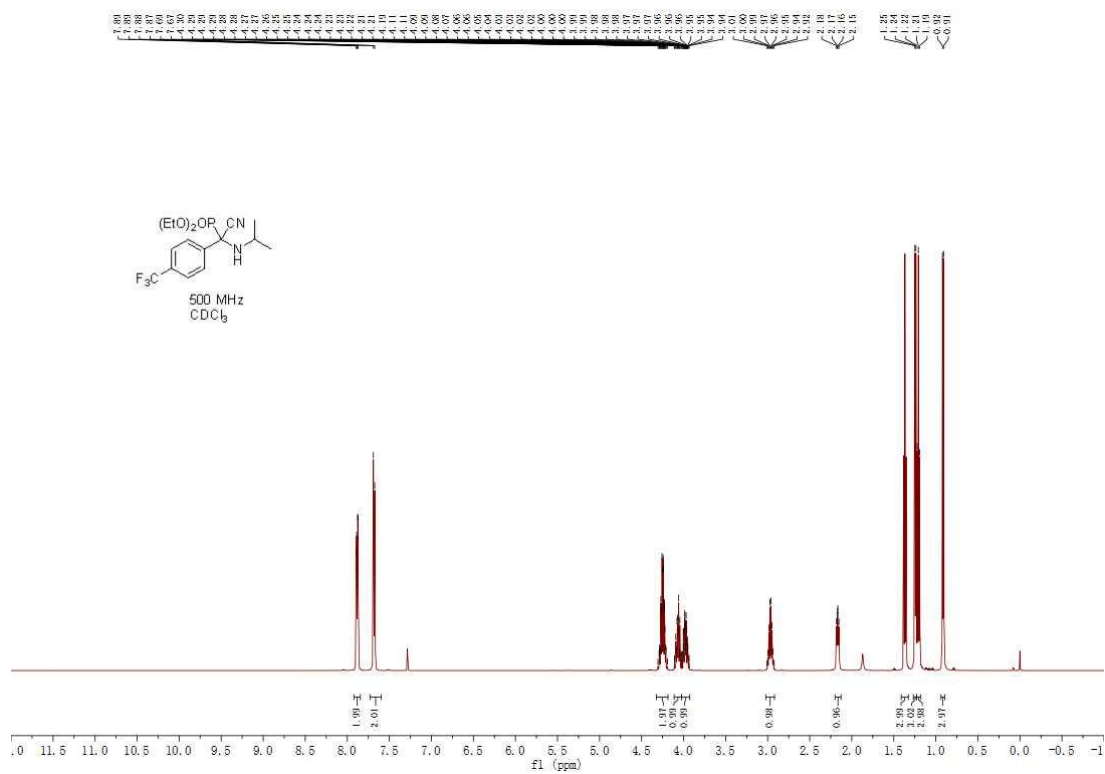

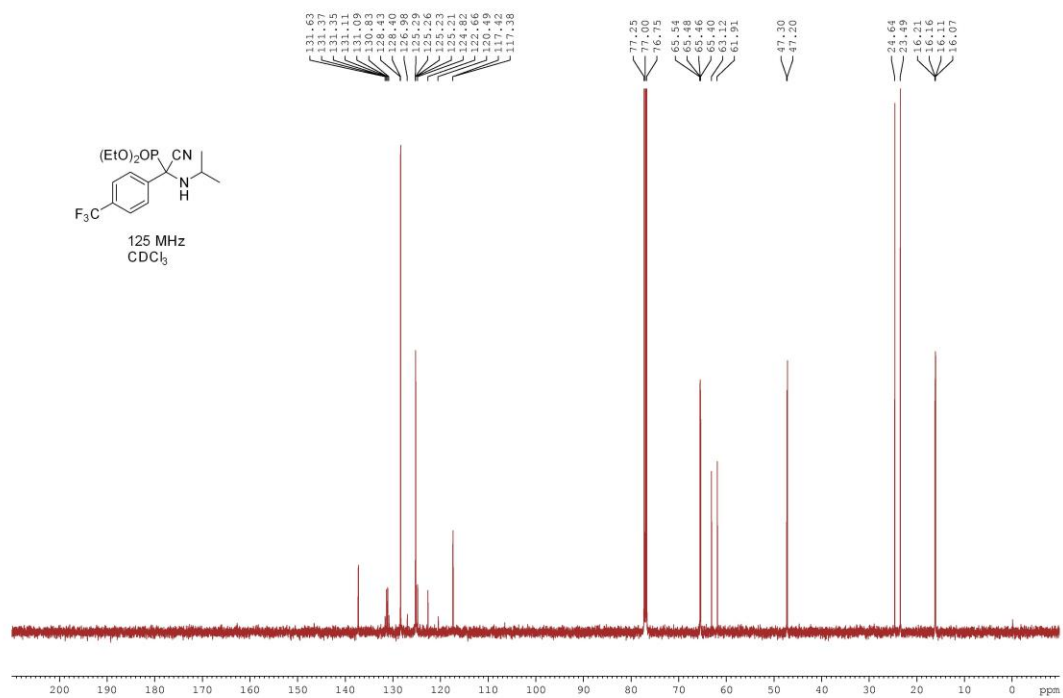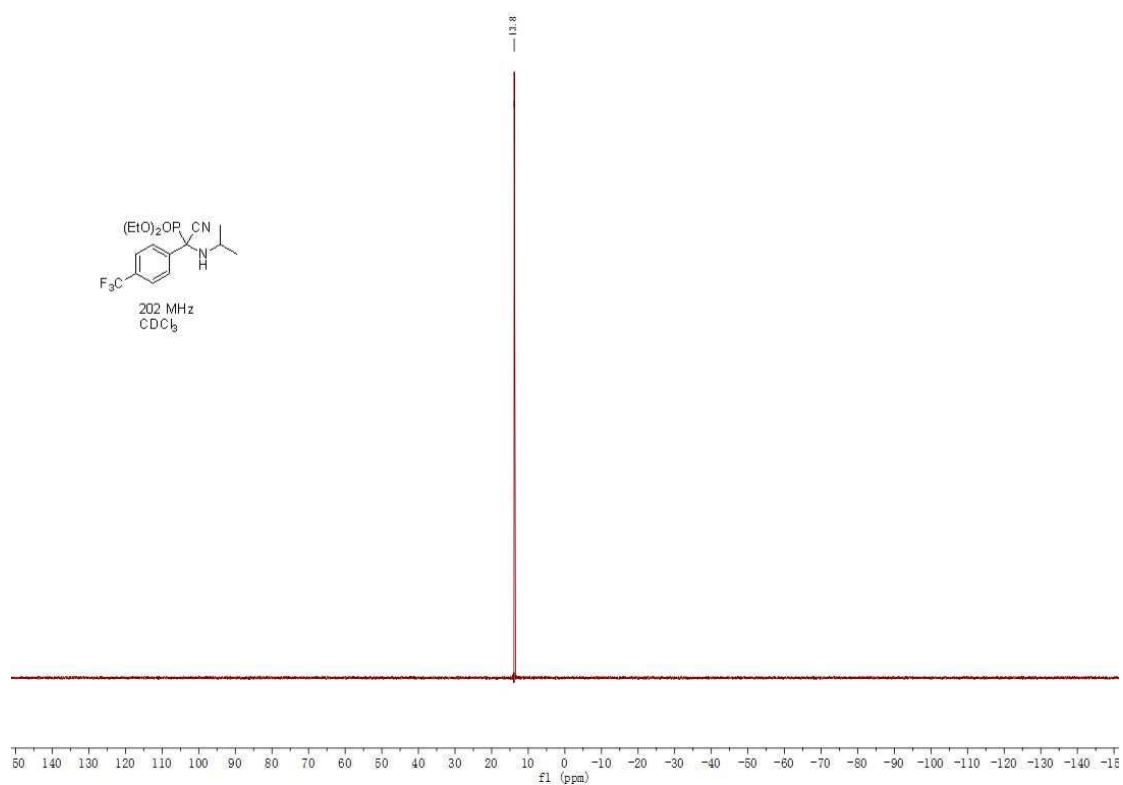

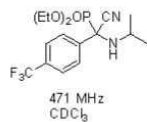

CC(C)NC(C#N)(COCCOCC)c1ccc([N+](=O)[O-])cc1  
 500 MHz  
 CDCl<sub>3</sub>

1.91  
 2.00  
 1.99  
 2.00  
 0.98  
 0.97  
 3.03  
 3.00

12.00  
 11.95  
 11.90  
 11.85  
 11.80  
 11.75  
 11.70  
 11.65  
 11.60  
 11.55  
 11.50  
 11.45  
 11.40  
 11.35  
 11.30  
 11.25  
 11.20  
 11.15  
 11.10  
 11.05  
 11.00  
 10.95  
 10.90  
 10.85  
 10.80  
 10.75  
 10.70  
 10.65  
 10.60  
 10.55  
 10.50  
 10.45  
 10.40  
 10.35  
 10.30  
 10.25  
 10.20  
 10.15  
 10.10  
 10.05  
 10.00  
 9.95  
 9.90  
 9.85  
 9.80  
 9.75  
 9.70  
 9.65  
 9.60  
 9.55  
 9.50  
 9.45  
 9.40  
 9.35  
 9.30  
 9.25  
 9.20  
 9.15  
 9.10  
 9.05  
 9.00  
 8.95  
 8.90  
 8.85  
 8.80  
 8.75  
 8.70  
 8.65  
 8.60  
 8.55  
 8.50  
 8.45  
 8.40  
 8.35  
 8.30  
 8.25  
 8.20  
 8.15  
 8.10  
 8.05  
 8.00  
 7.95  
 7.90  
 7.85  
 7.80  
 7.75  
 7.70  
 7.65  
 7.60  
 7.55  
 7.50  
 7.45  
 7.40  
 7.35  
 7.30  
 7.25  
 7.20  
 7.15  
 7.10  
 7.05  
 7.00  
 6.95  
 6.90  
 6.85  
 6.80  
 6.75  
 6.70  
 6.65  
 6.60  
 6.55  
 6.50  
 6.45  
 6.40  
 6.35  
 6.30  
 6.25  
 6.20  
 6.15  
 6.10  
 6.05  
 6.00  
 5.95  
 5.90  
 5.85  
 5.80  
 5.75  
 5.70  
 5.65  
 5.60  
 5.55  
 5.50  
 5.45  
 5.40  
 5.35  
 5.30  
 5.25  
 5.20  
 5.15  
 5.10  
 5.05  
 5.00  
 4.95  
 4.90  
 4.85  
 4.80  
 4.75  
 4.70  
 4.65  
 4.60  
 4.55  
 4.50  
 4.45  
 4.40  
 4.35  
 4.30  
 4.25  
 4.20  
 4.15  
 4.10  
 4.05  
 4.00  
 3.95  
 3.90  
 3.85  
 3.80  
 3.75  
 3.70  
 3.65  
 3.60  
 3.55  
 3.50  
 3.45  
 3.40  
 3.35  
 3.30  
 3.25  
 3.20  
 3.15  
 3.10  
 3.05  
 3.00  
 2.95  
 2.90  
 2.85  
 2.80  
 2.75  
 2.70  
 2.65  
 2.60  
 2.55  
 2.50  
 2.45  
 2.40  
 2.35  
 2.30  
 2.25  
 2.20  
 2.15  
 2.10  
 2.05  
 2.00  
 1.95  
 1.90  
 1.85  
 1.80  
 1.75  
 1.70  
 1.65  
 1.60  
 1.55  
 1.50  
 1.45  
 1.40  
 1.35  
 1.30  
 1.25  
 1.20  
 1.15  
 1.10  
 1.05  
 1.00  
 0.95  
 0.90  
 0.85  
 0.80  
 0.75  
 0.70  
 0.65  
 0.60  
 0.55  
 0.50  
 0.45  
 0.40  
 0.35  
 0.30  
 0.25  
 0.20  
 0.15  
 0.10  
 0.05  
 0.00  
 -0.05  
 -0.10  
 -0.15  
 -0.20  
 -0.25  
 -0.30  
 -0.35  
 -0.40  
 -0.45  
 -0.50  
 -0.55  
 -0.60  
 -0.65  
 -0.70  
 -0.75  
 -0.80  
 -0.85  
 -0.90  
 -0.95  
 -1.00



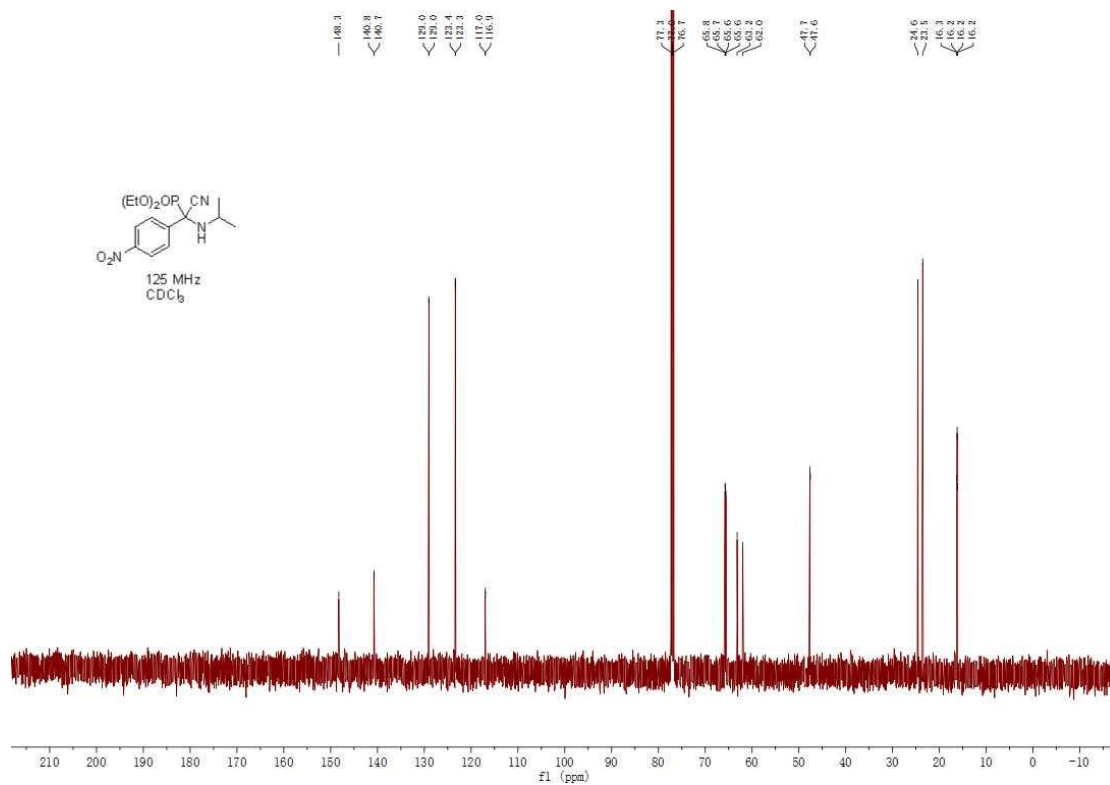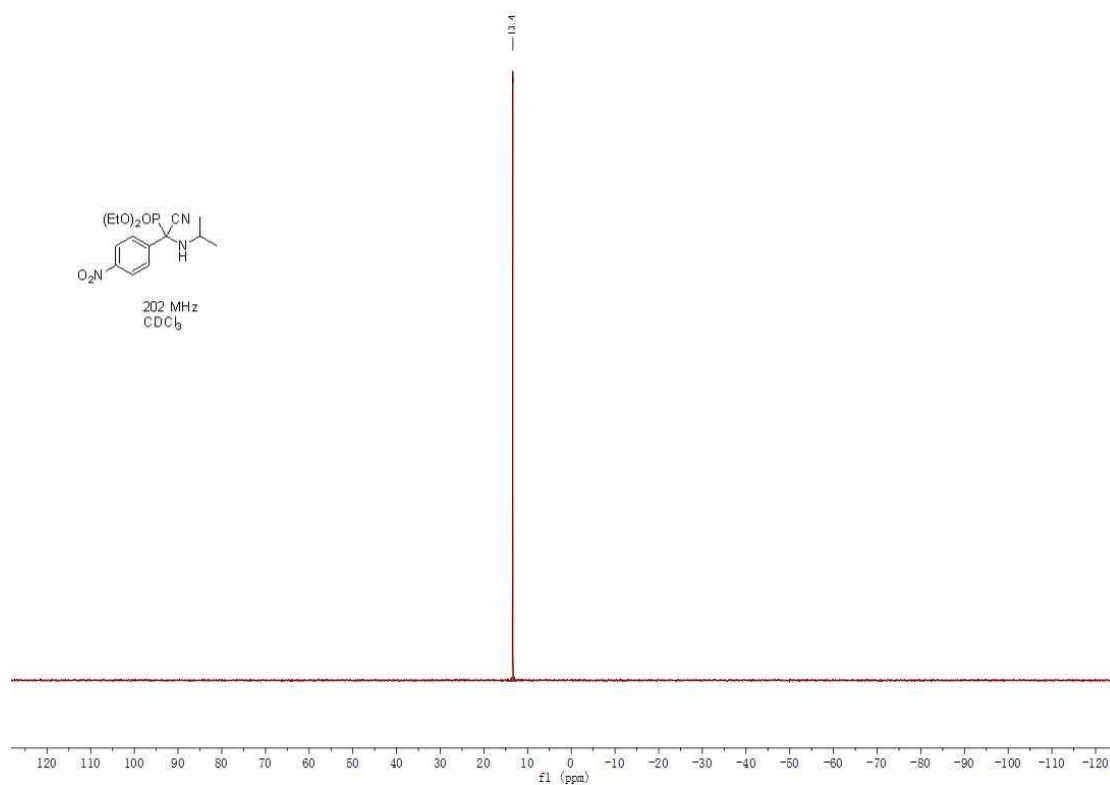

# Diethyl (cyano(4-cyanophenyl)(isopropylamino)methyl)phosphonate (1l)

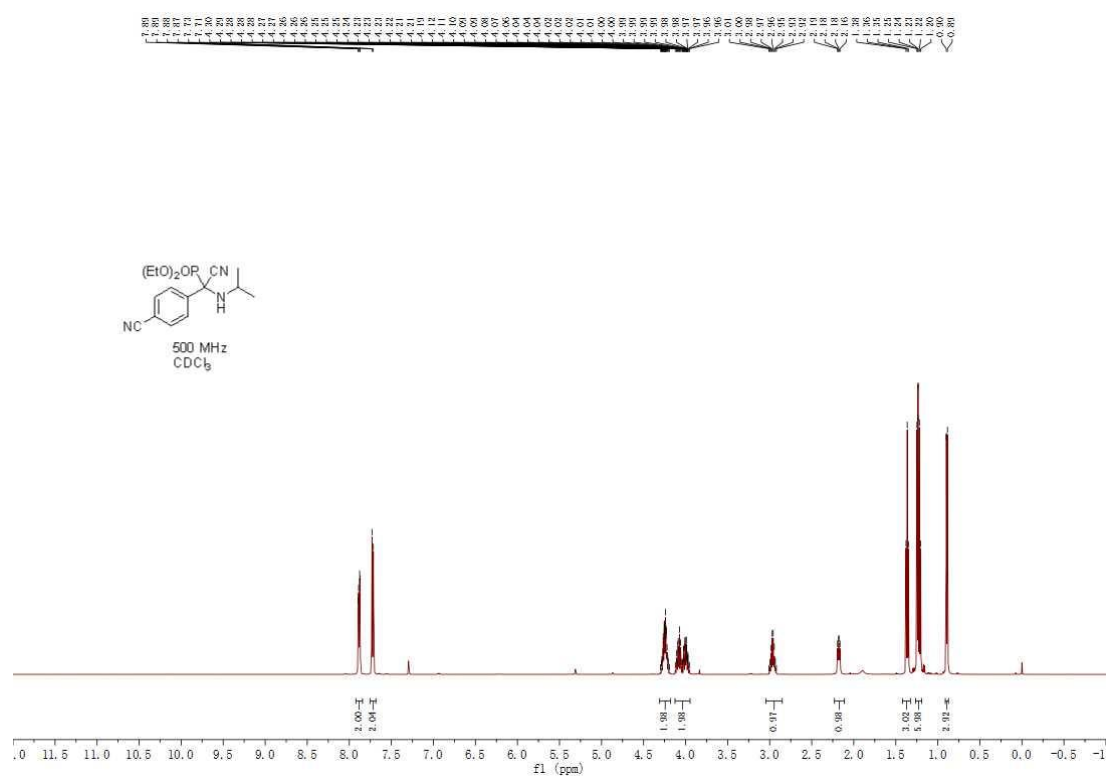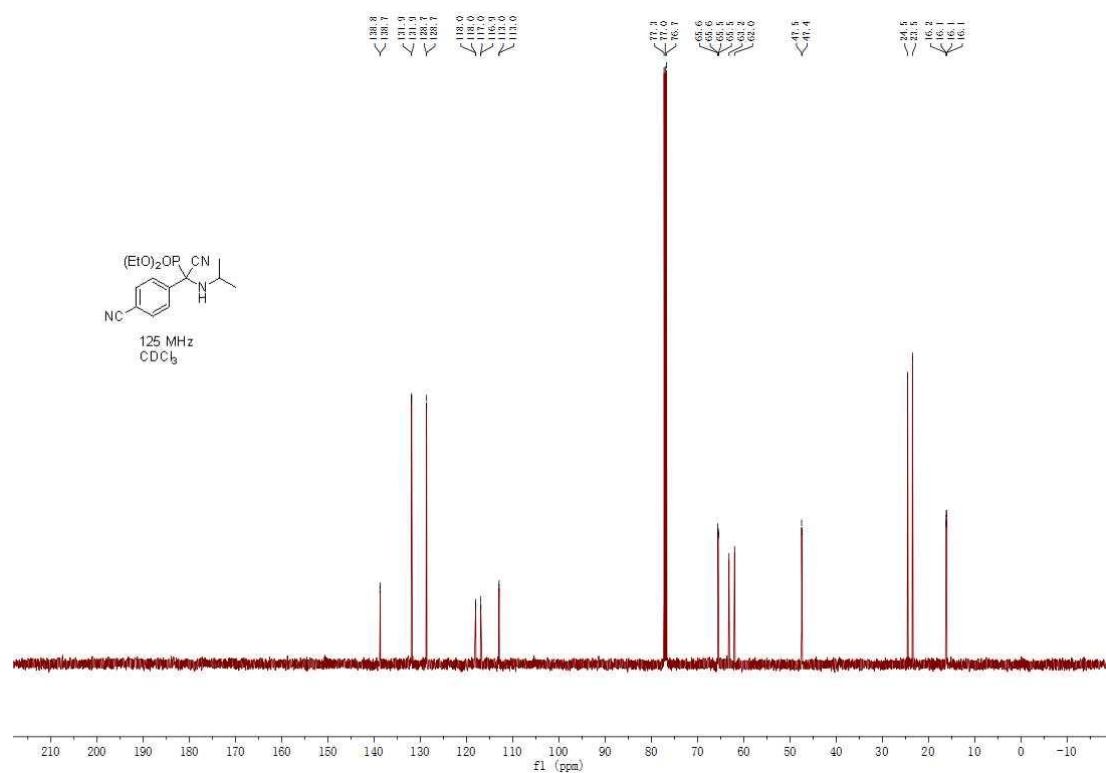

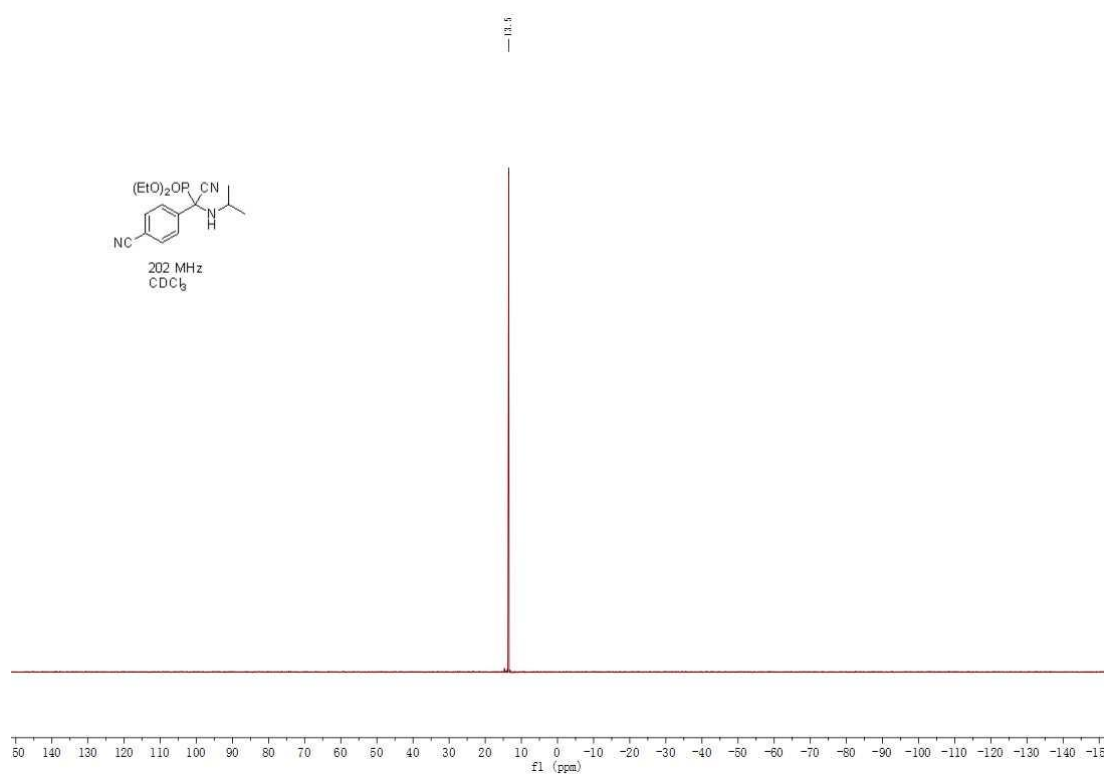

**Diethyl (*E*)-((cyano(isopropylamino)(4-(phenyldiazenyl)phenyl)methyl)phosphonate (1m)**

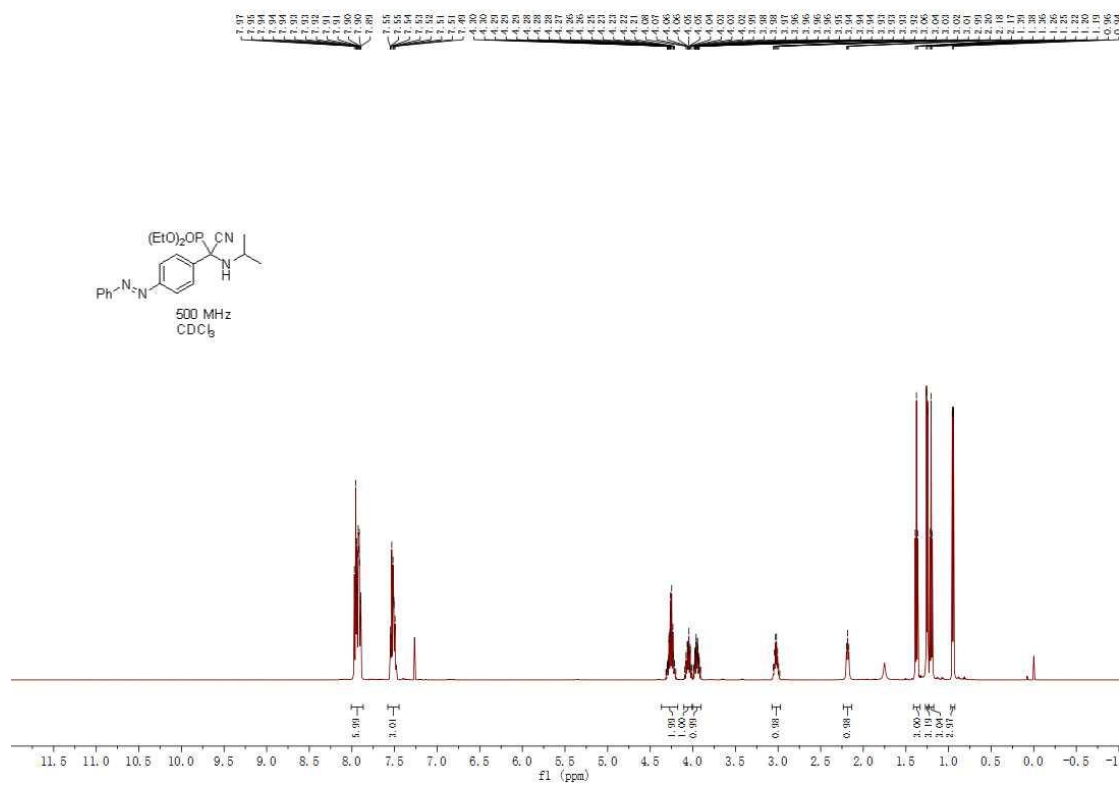

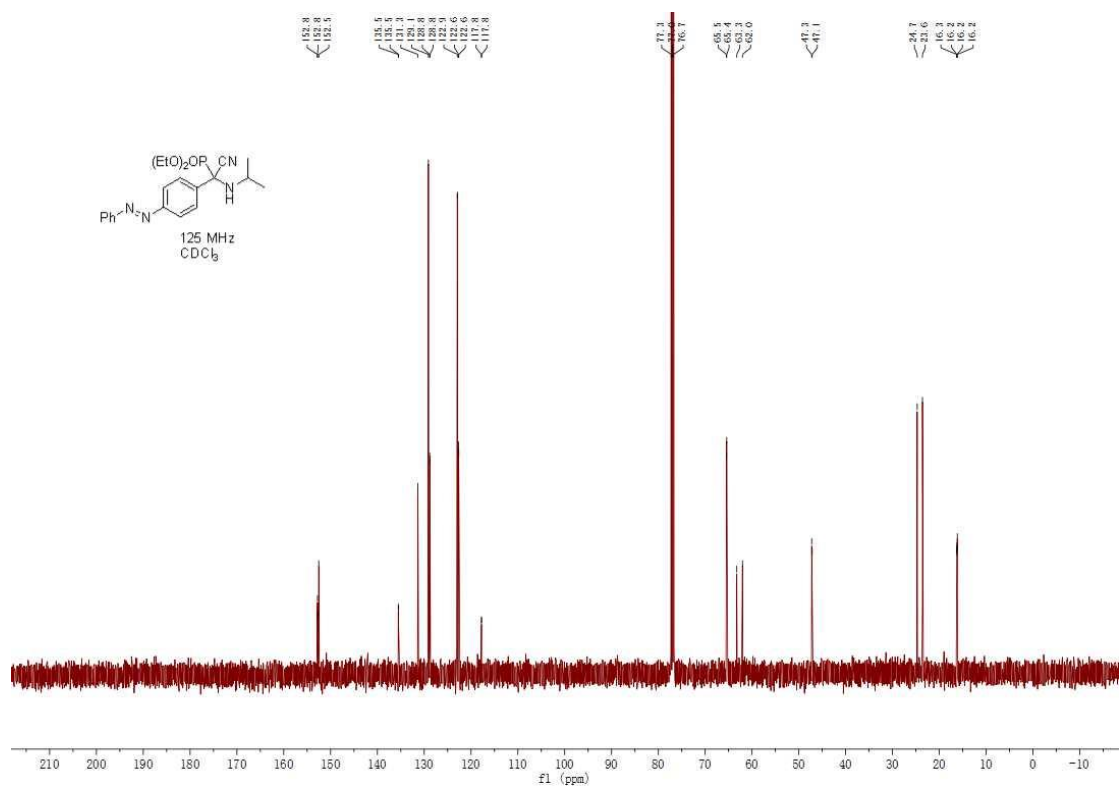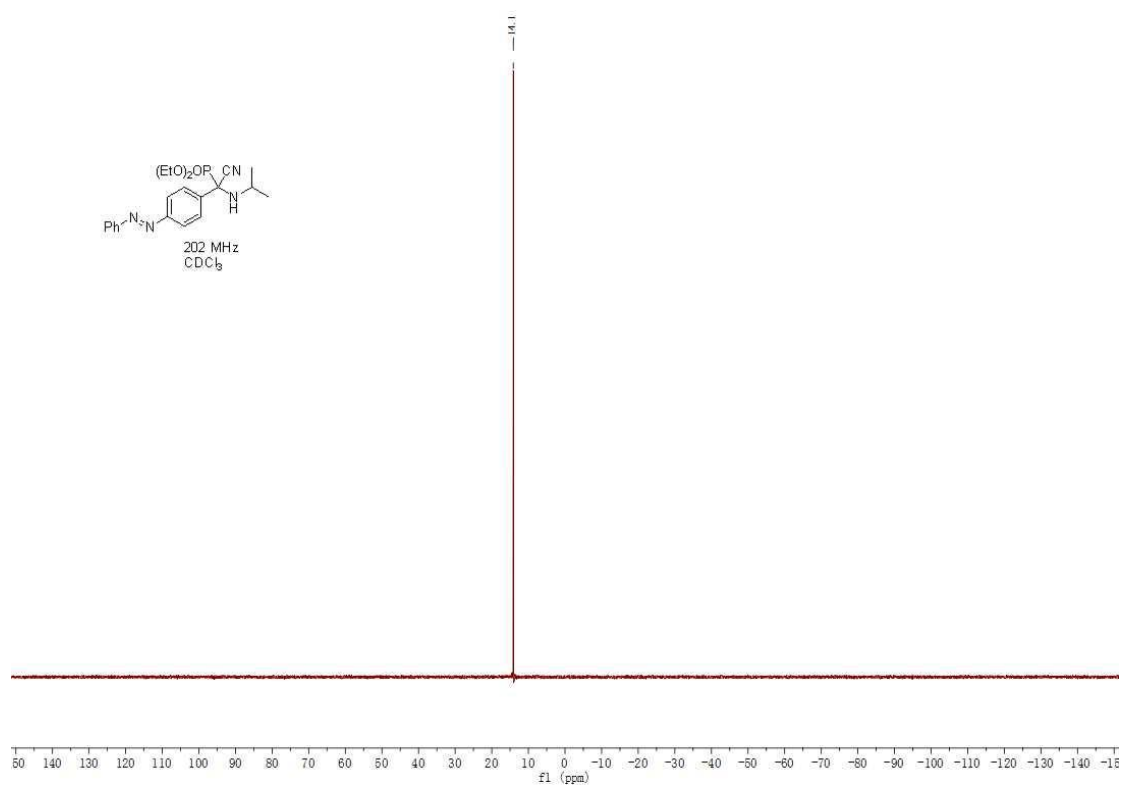

CC(C)NC(C#N)C(=O)c1ccc(cc1)C(=O)OCCOCC  
 500 MHz  
 CDCl<sub>3</sub>

7.80 (d, 2H), 7.70 (d, 2H), 7.10 (s, 1H), 4.20-4.40 (m, 4H), 3.00 (s, 3H), 2.50 (s, 3H), 2.00 (s, 3H), 1.20 (d, 6H), 0.00 (t, 3H)

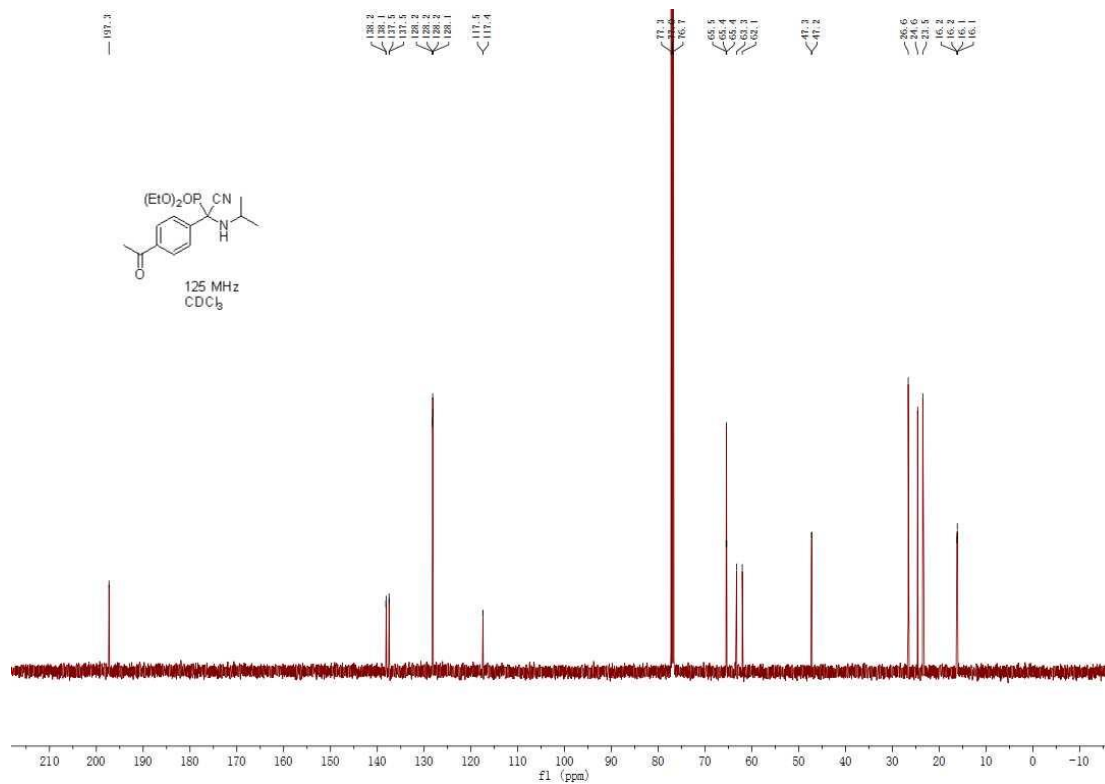

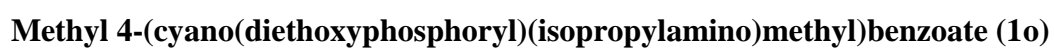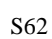



# Diethyl (cyano(isopropylamino)(naphthalen-2-yl)methyl)phosphonate (1p)

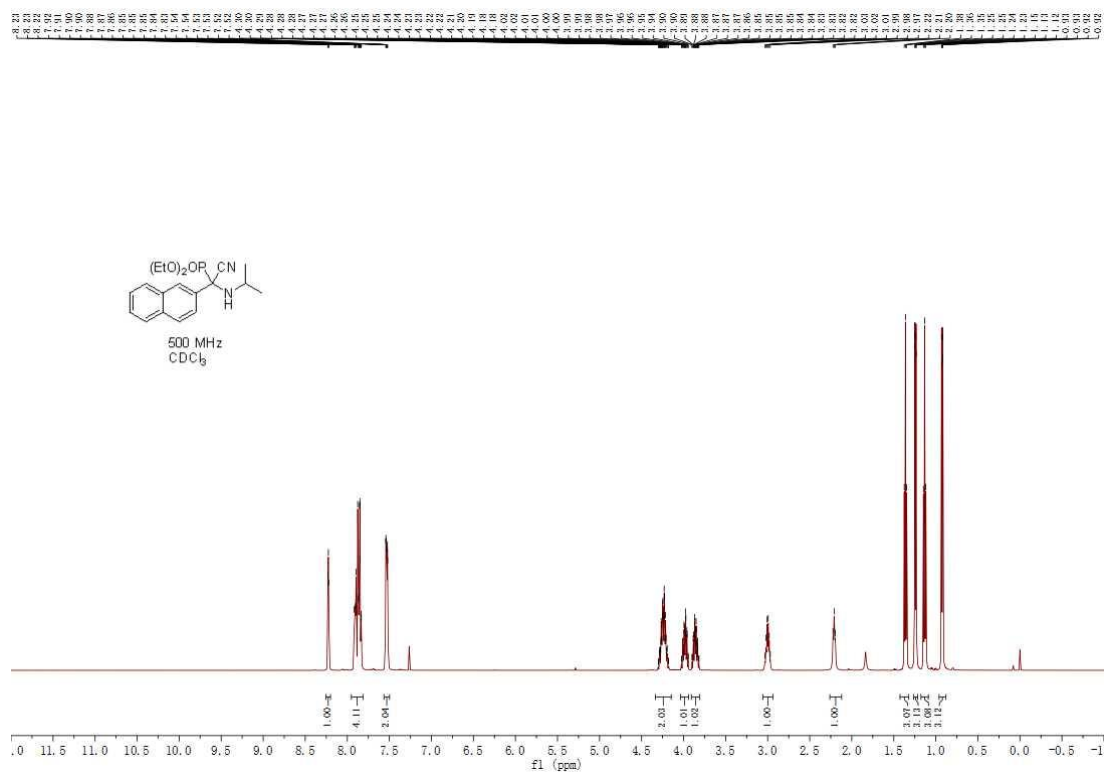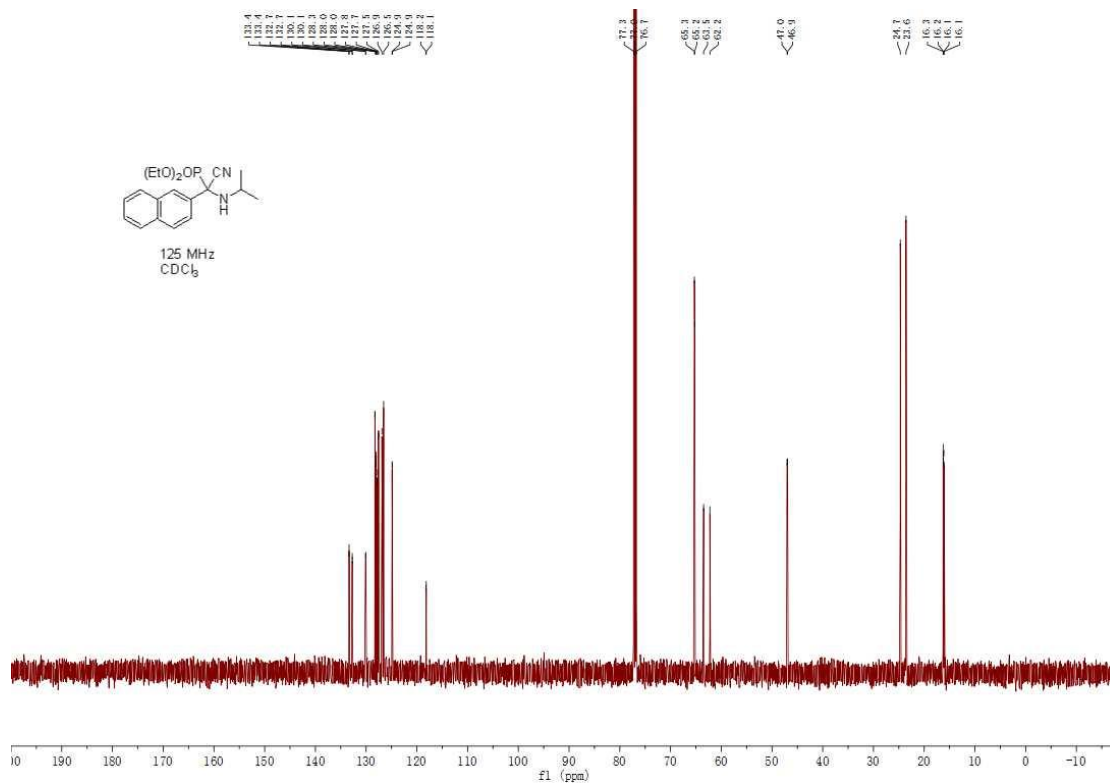



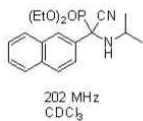

CCOC(=O)C(c1ccccc1)C(=O)Nc2ccccc2

500 MHz  
 CDCl<sub>3</sub>

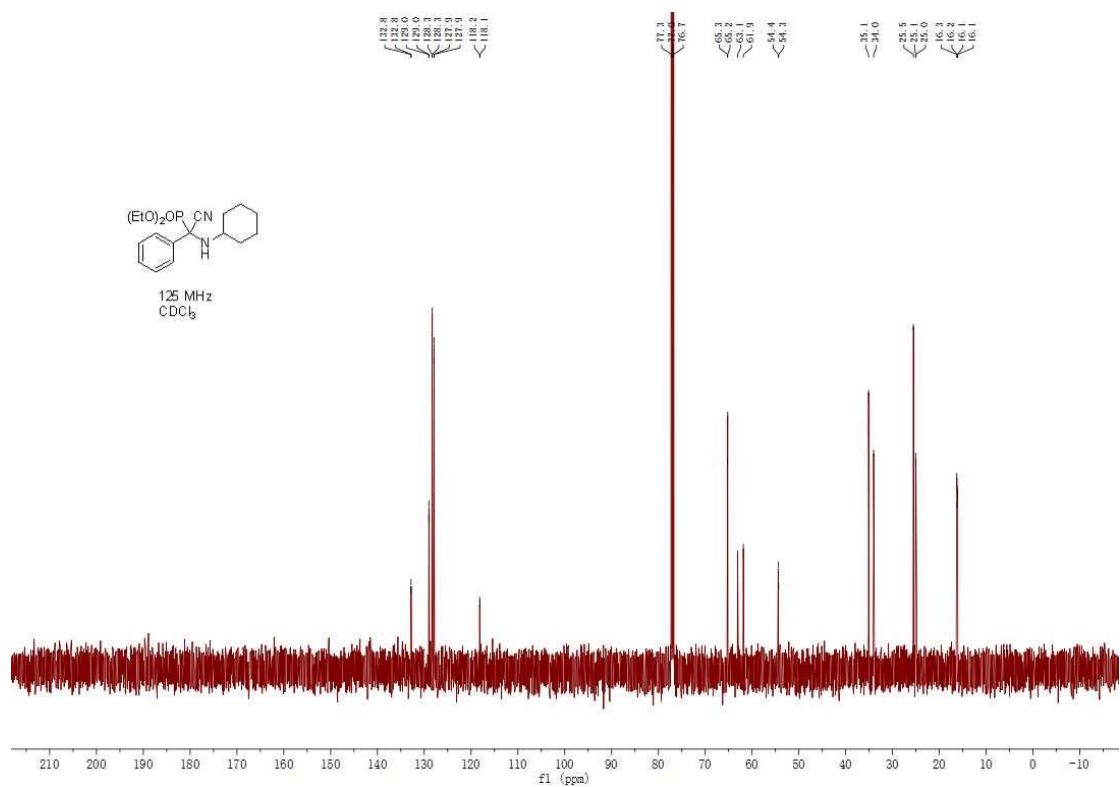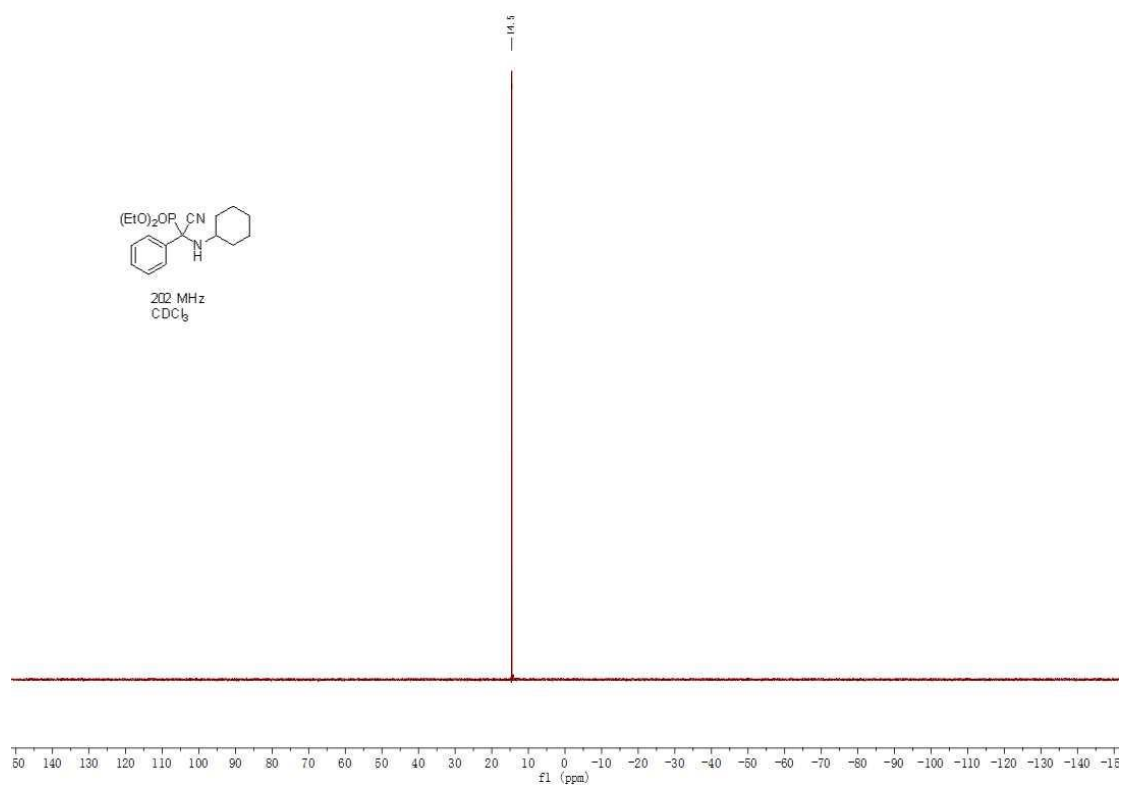

**Diethyl (cyano(cyclopropylamino)(phenyl)methyl)phosphonate (1r)**

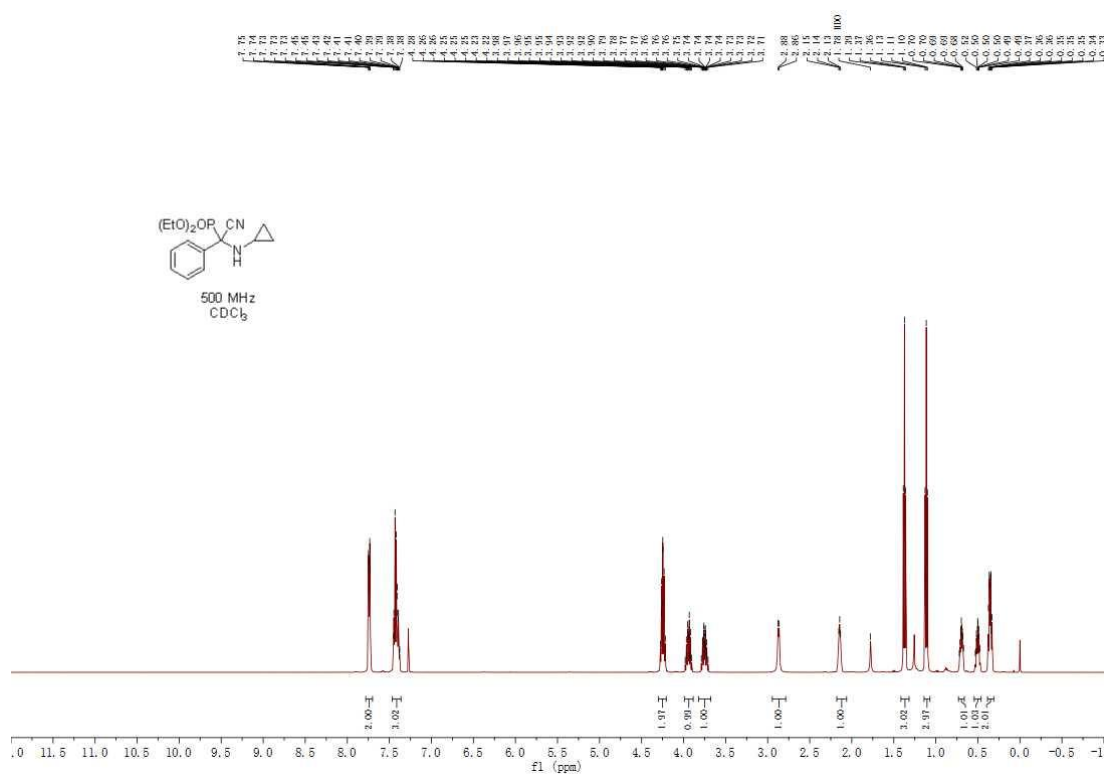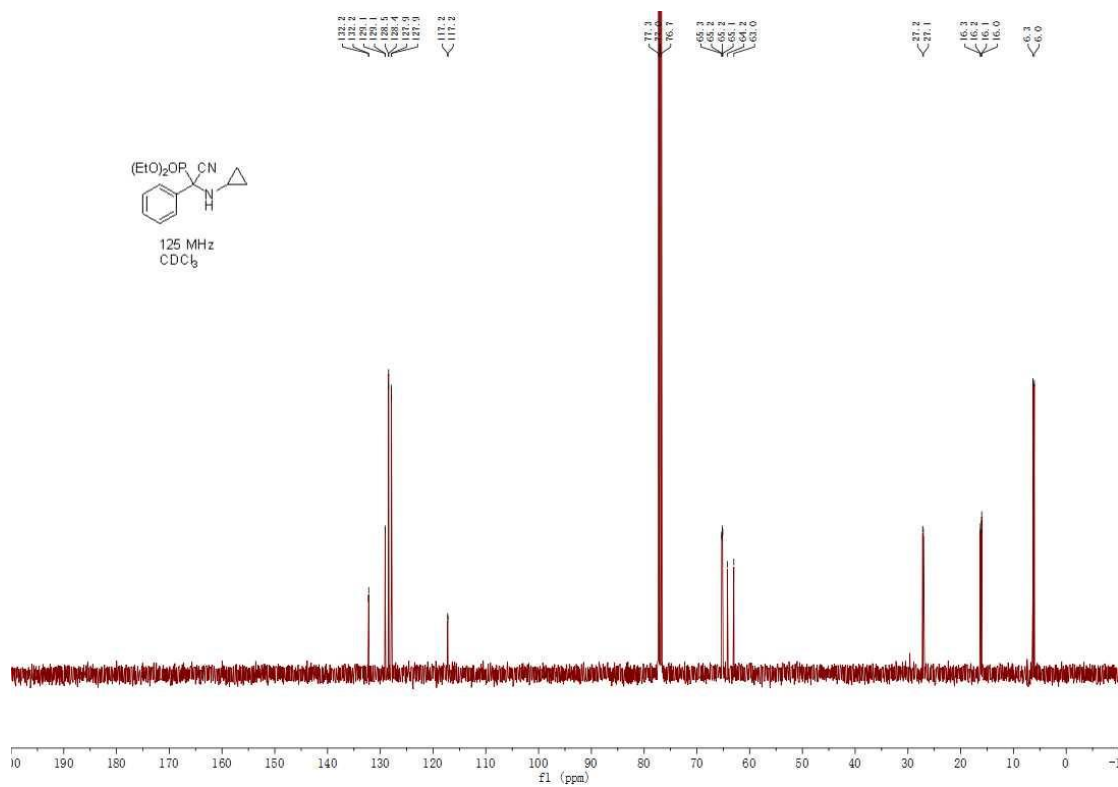

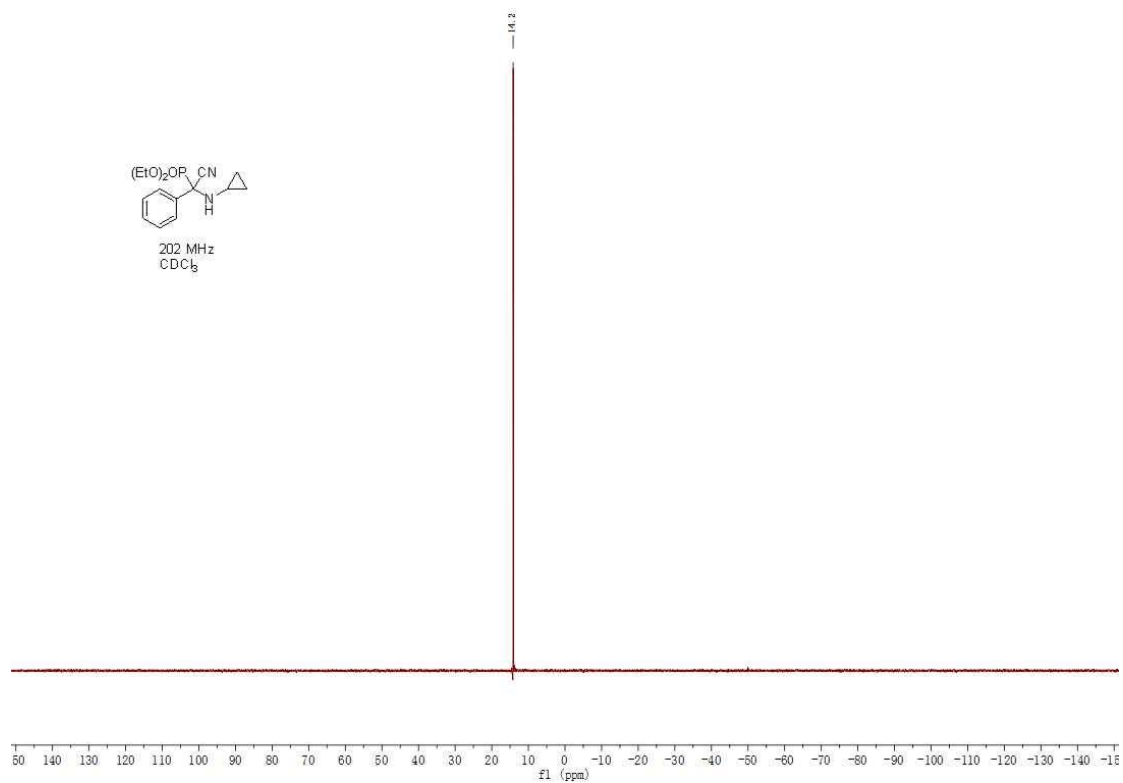

**Diethyl (cyano((S)-1-methoxy-3-methylbutan-2-yl)amino)(phenyl)methylphosphonate (1s)**

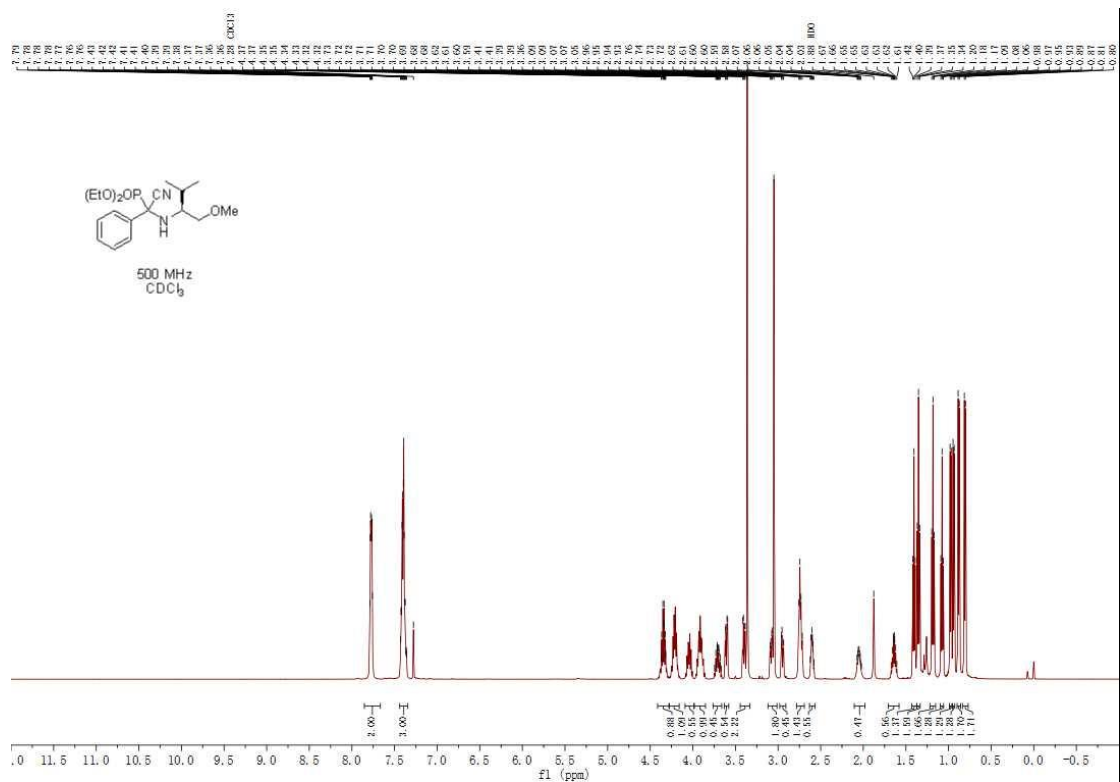

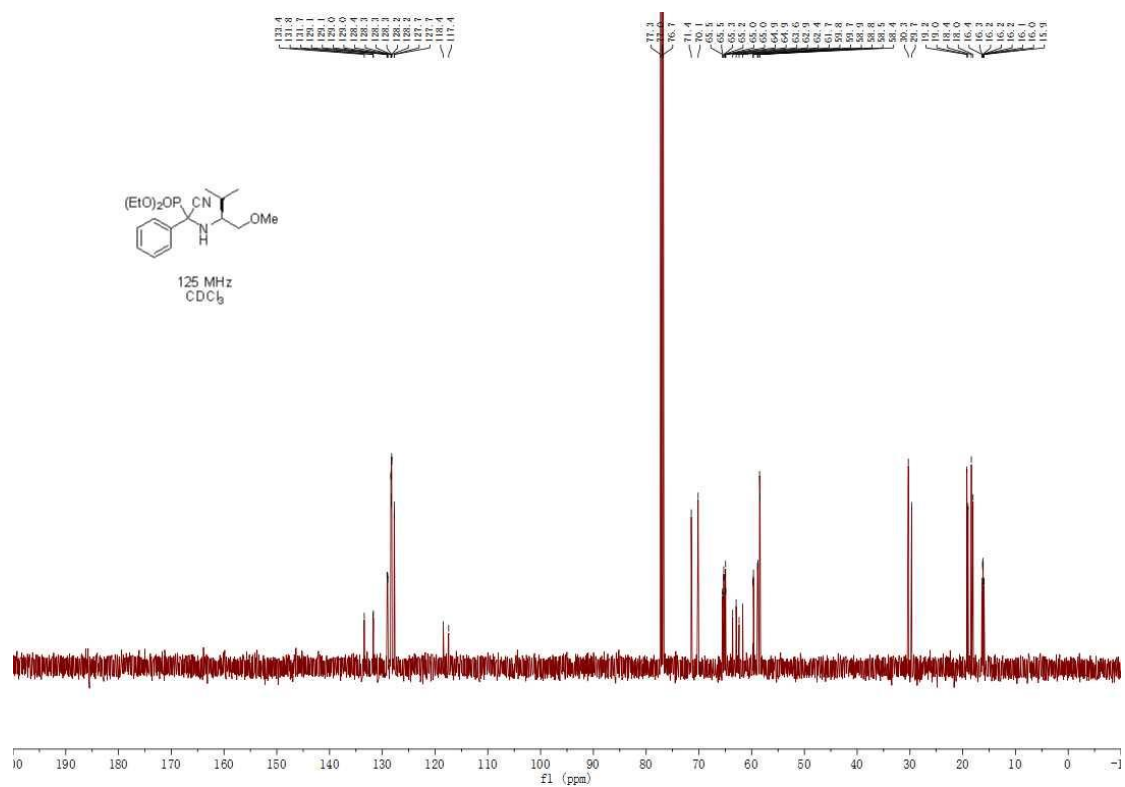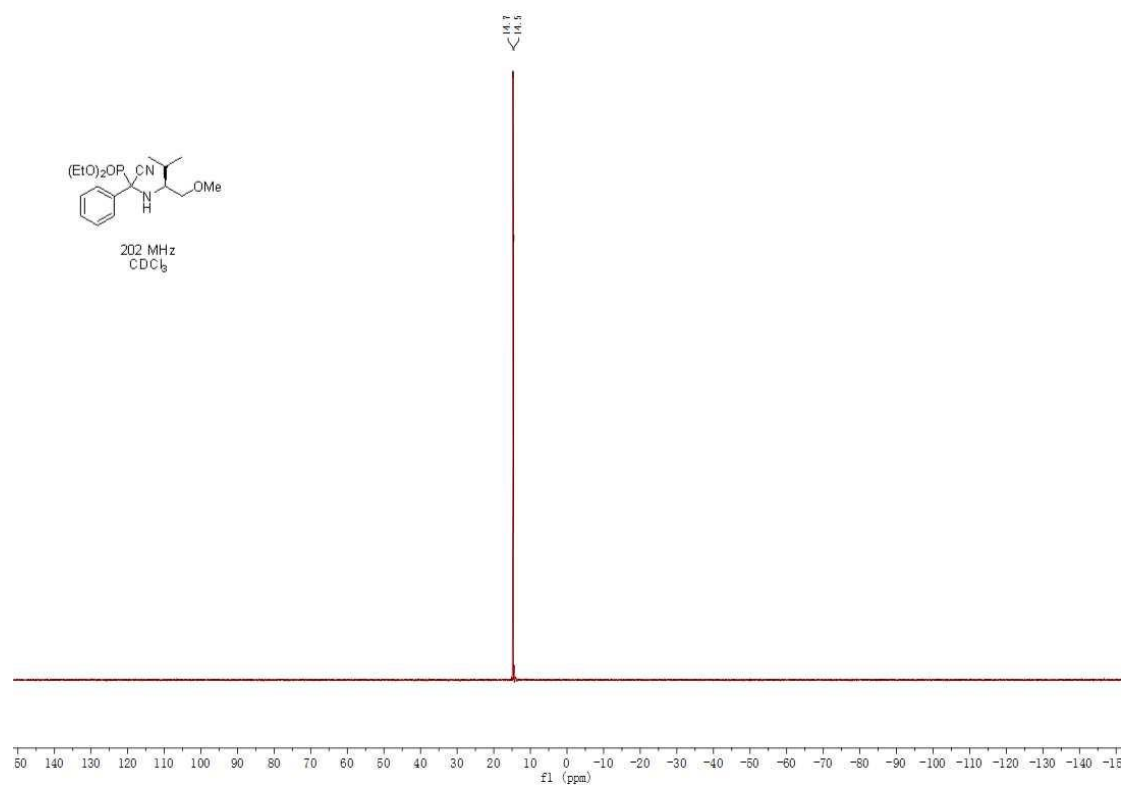

# Diethyl (cyano(ethylamino)(phenyl)methyl)phosphonate (1t)

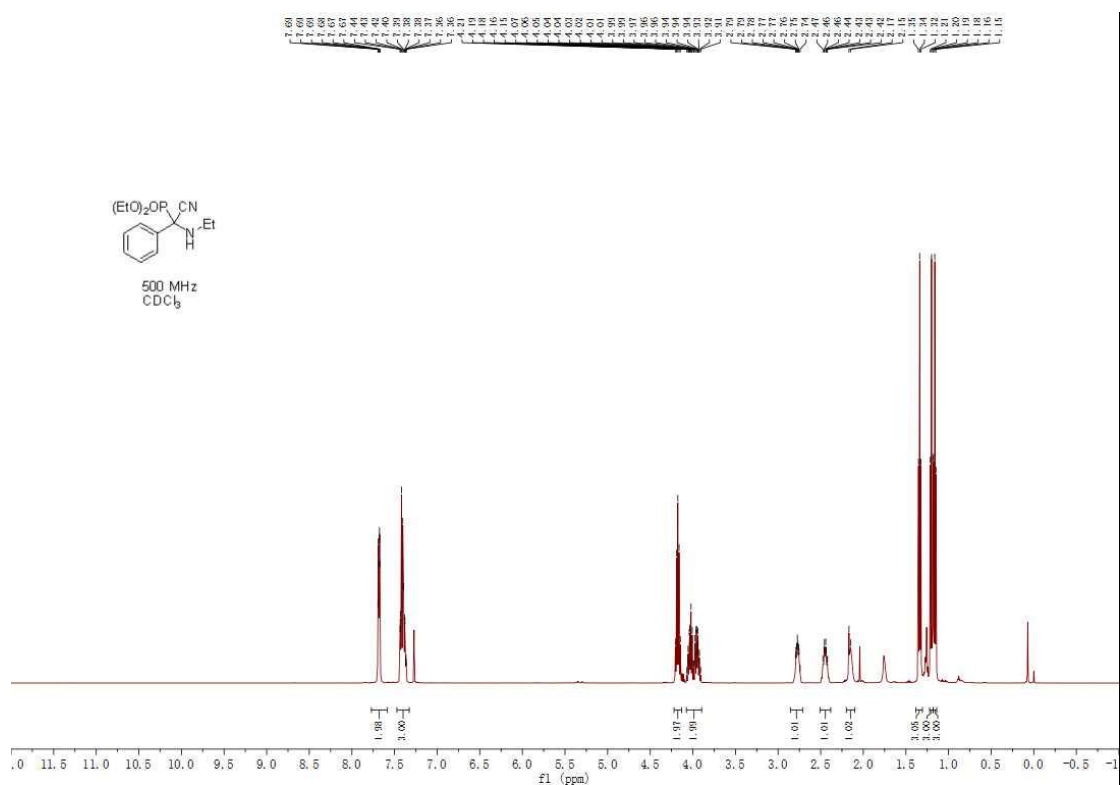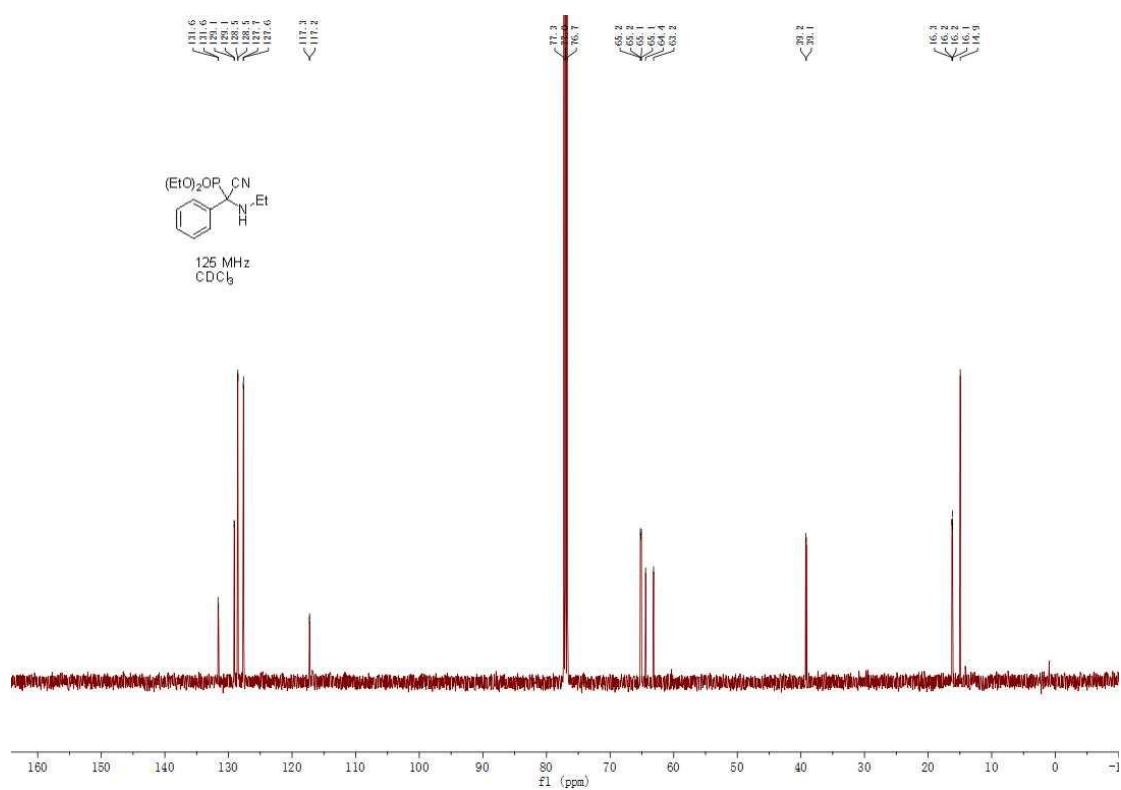

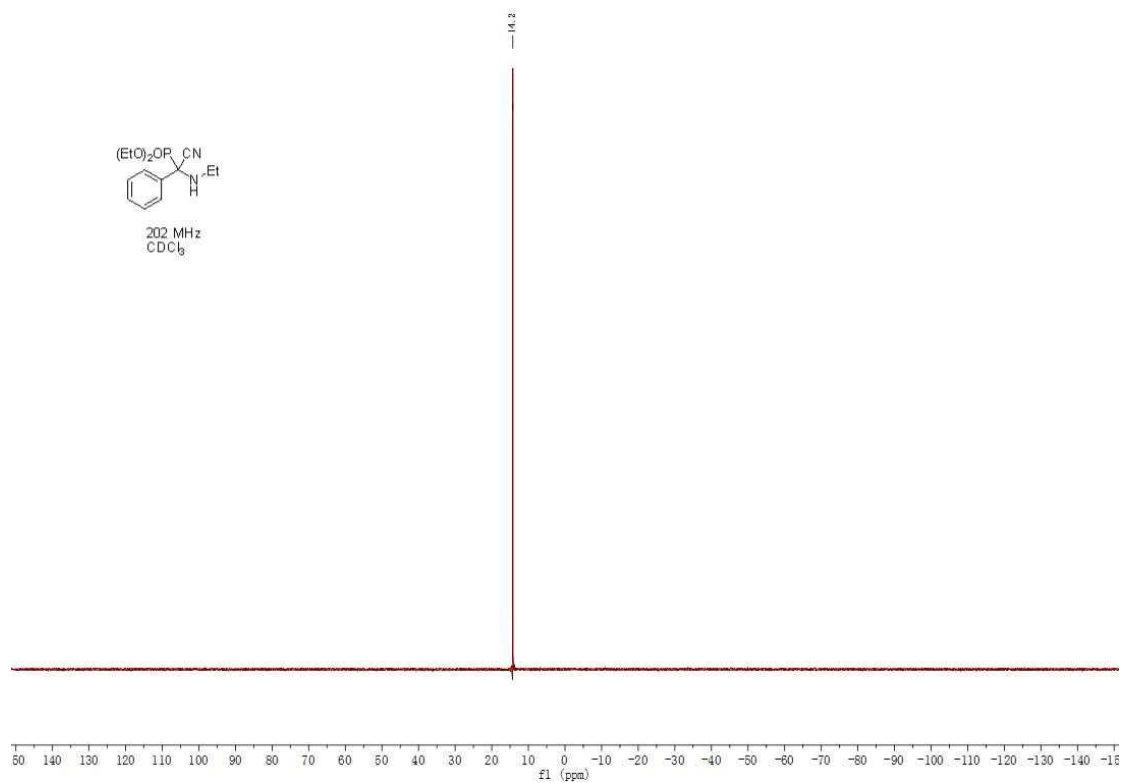

## Diethyl (cyano((3-methoxypropyl)amino)(phenyl)methyl)phosphonate (1u)

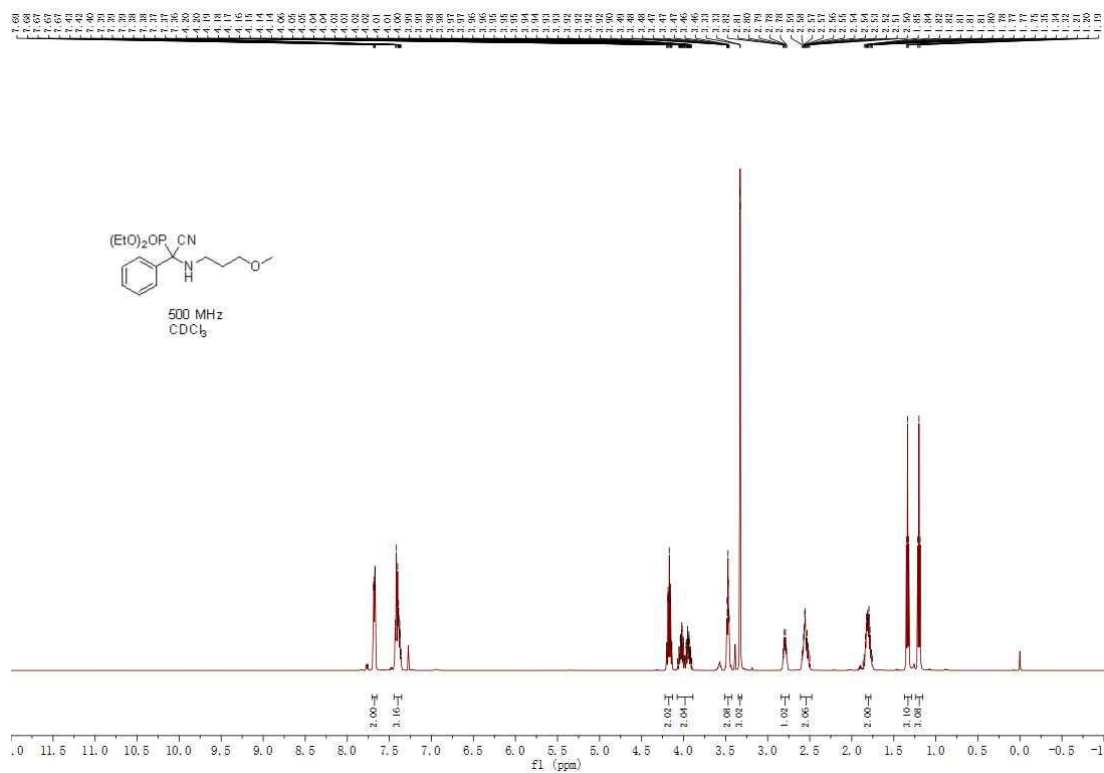

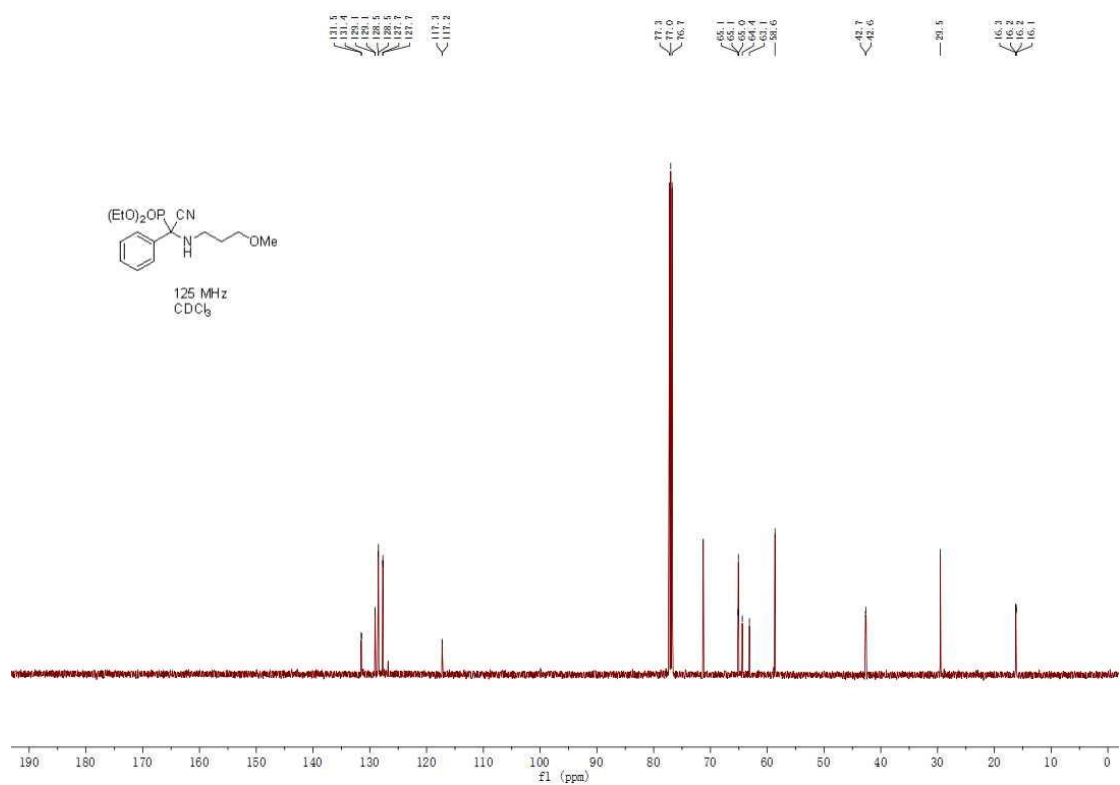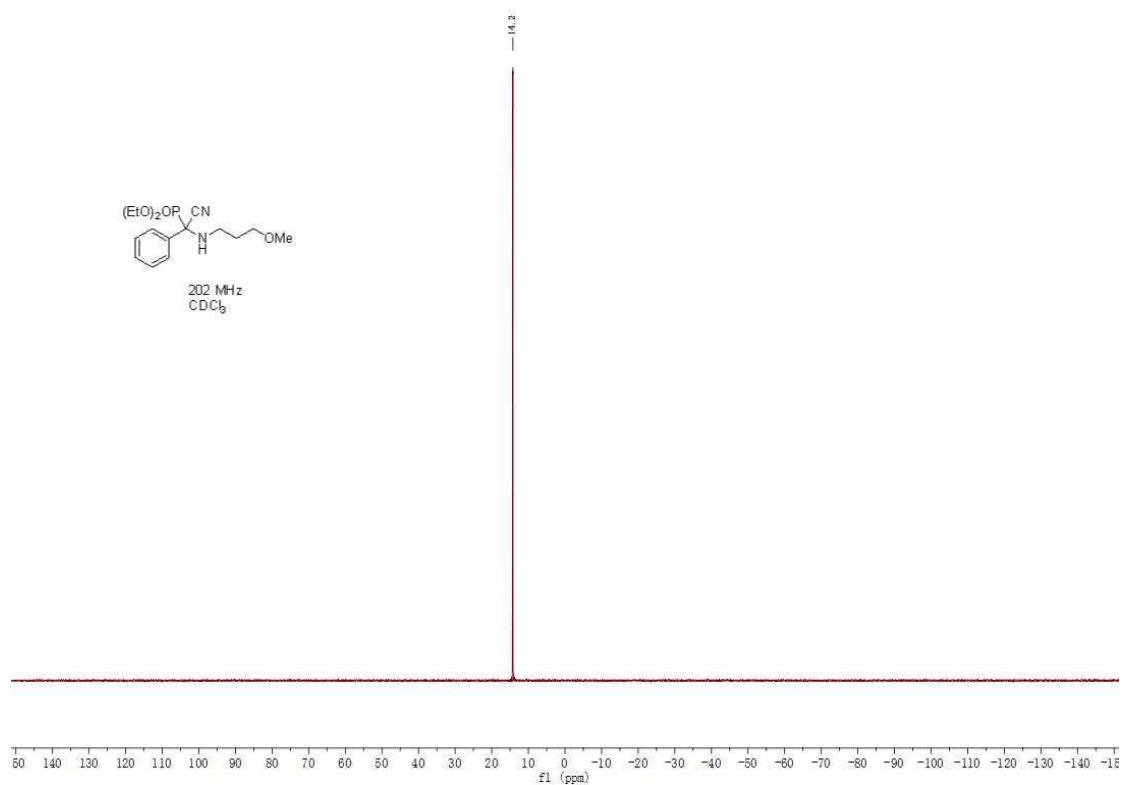



# **Methyl 3-((cyano(diethoxyphosphoryl)(phenyl)methyl)amino)propanoate (1v)**

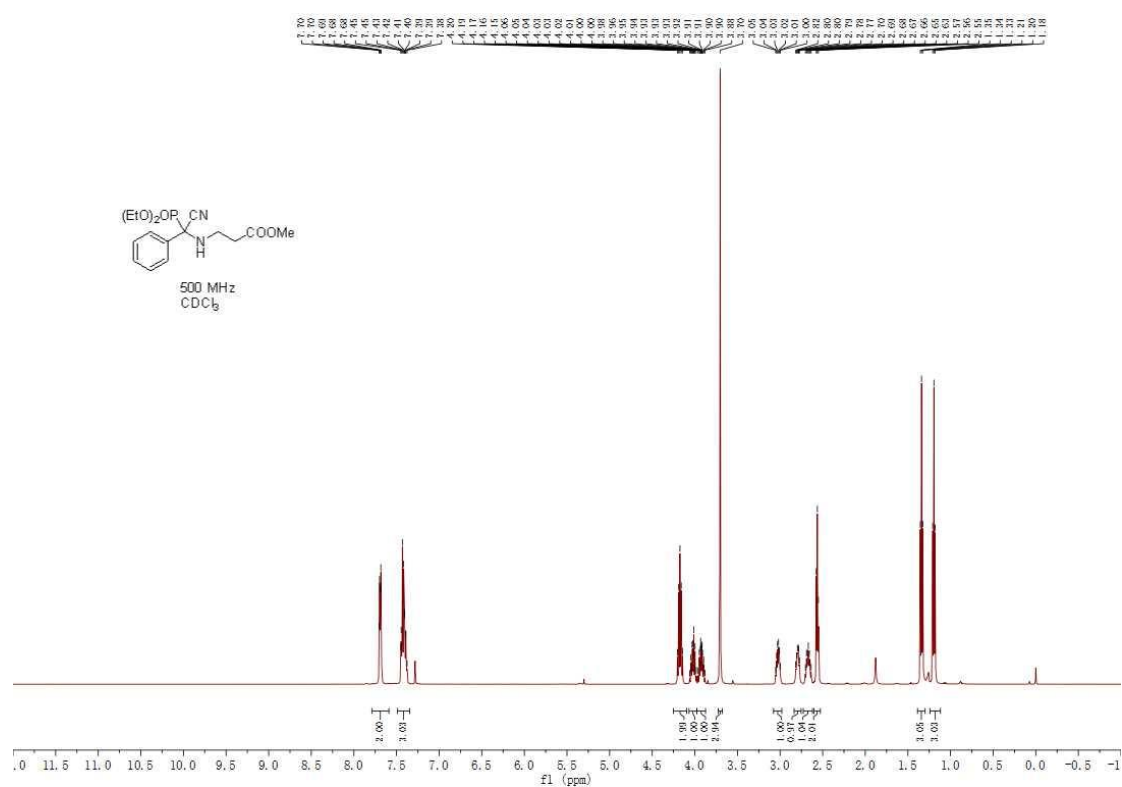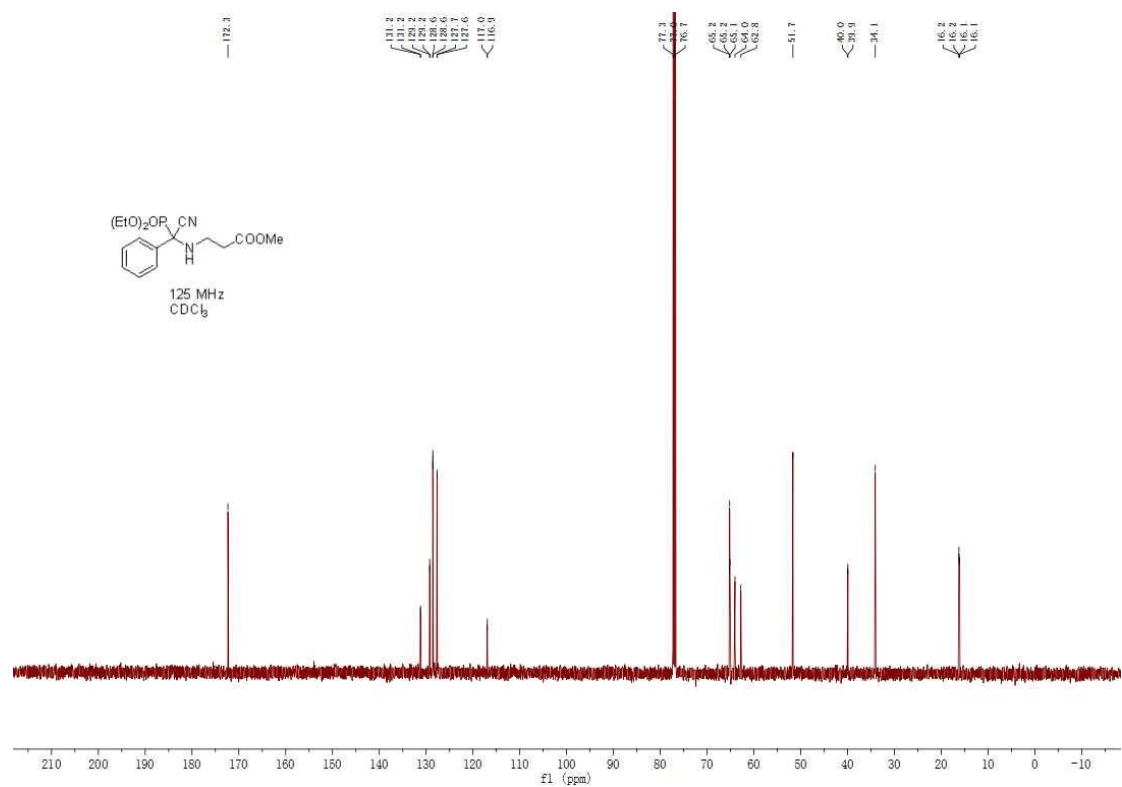

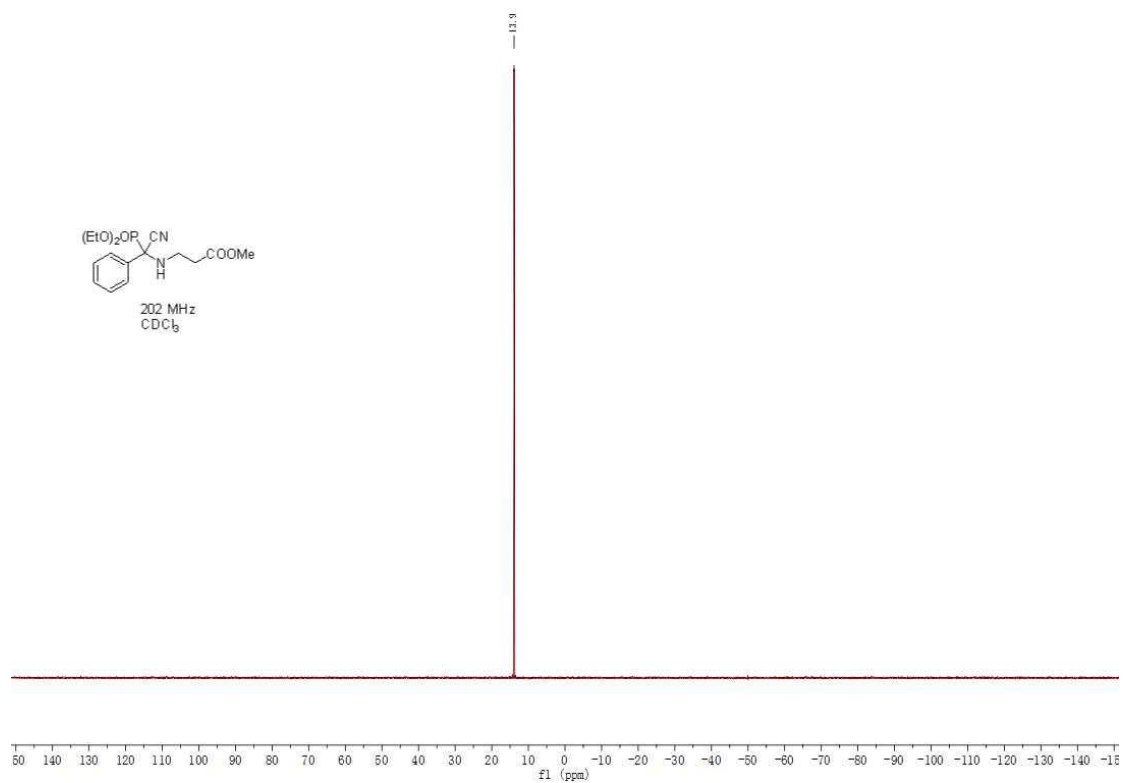

# Diethyl (((2-chloroethyl)amino)(cyano)(phenyl)methyl)phosphonate (1w)

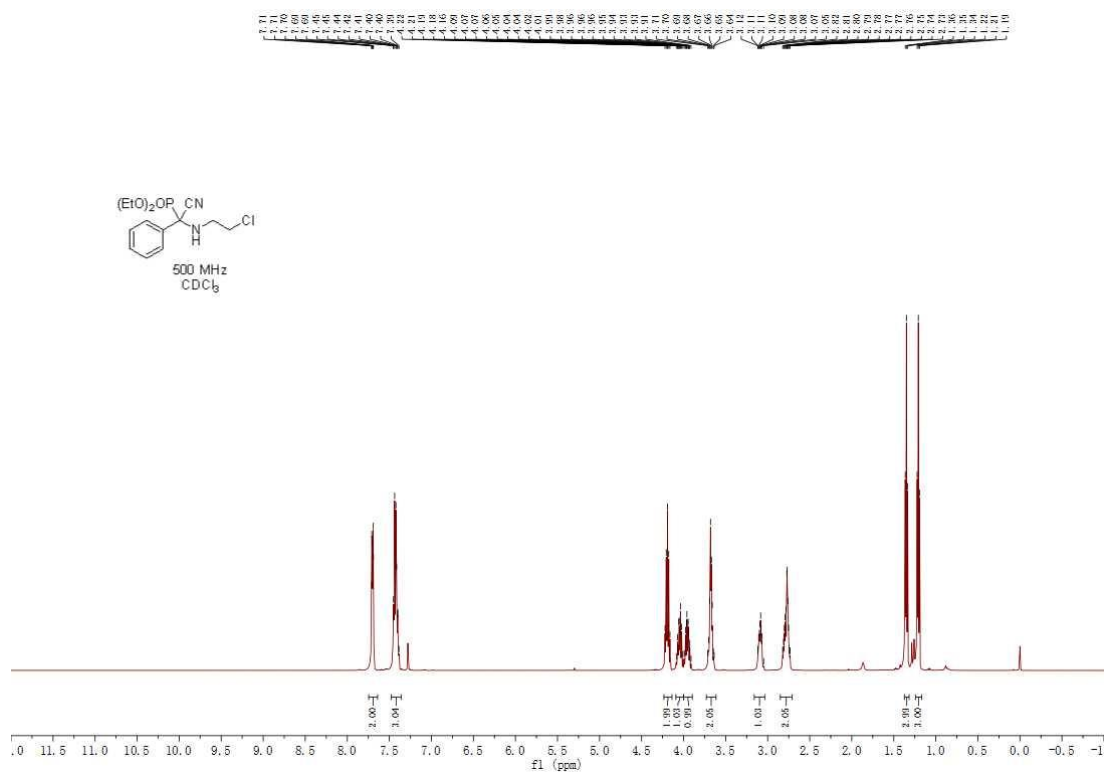

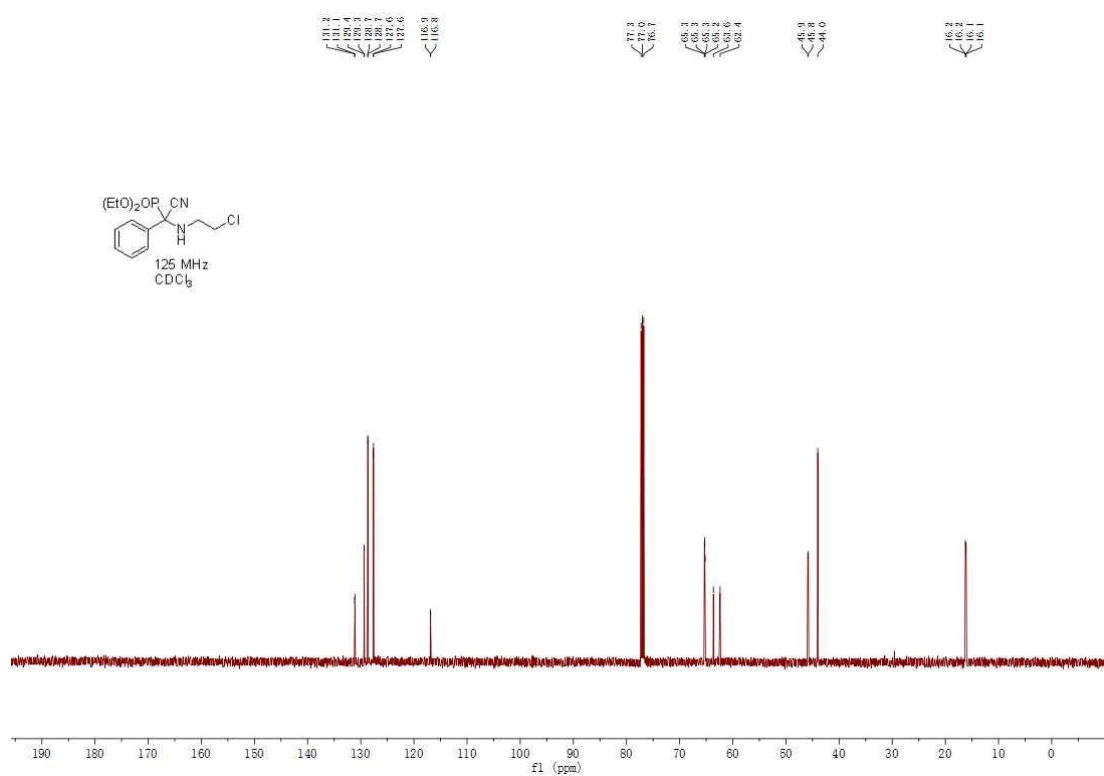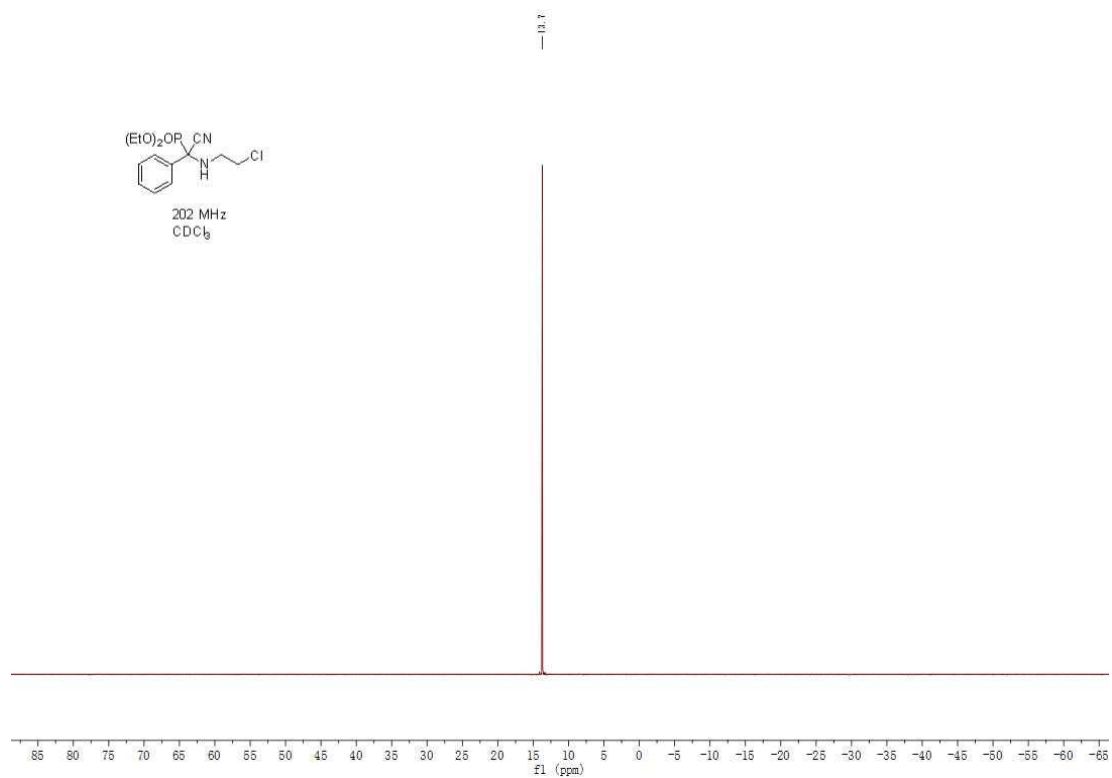

# Diethyl (((2-bromoethyl)amino)(cyano)(phenyl)methyl)phosphonate (1x)

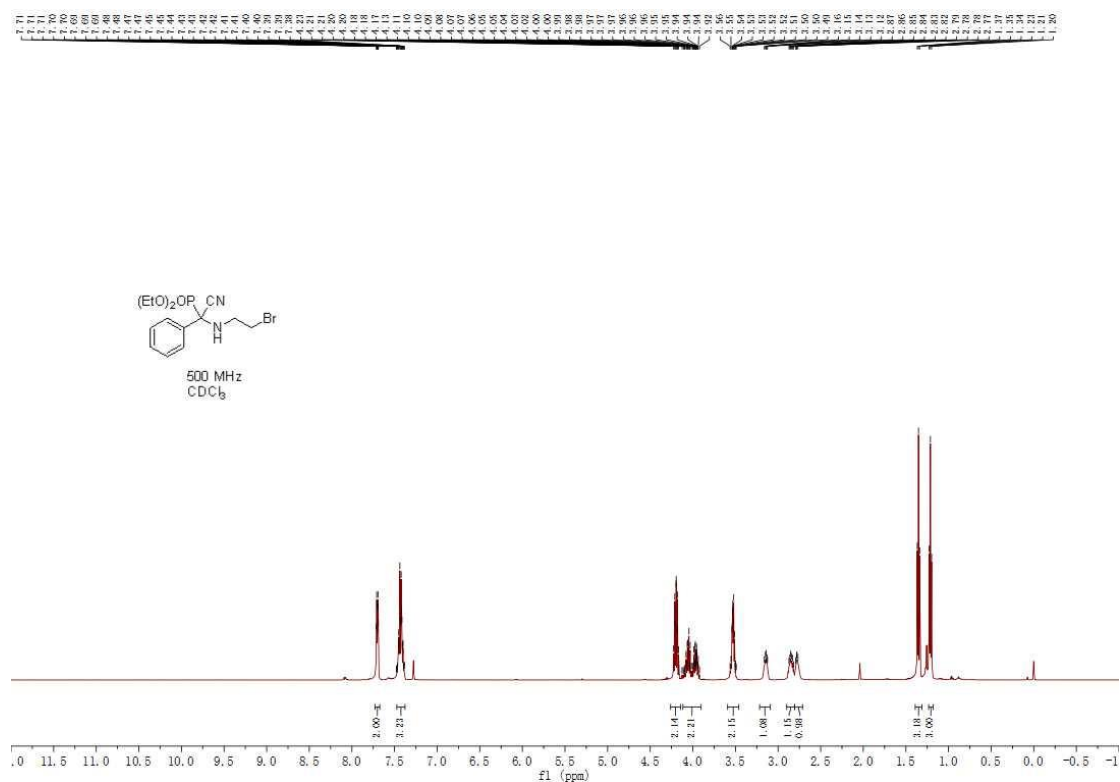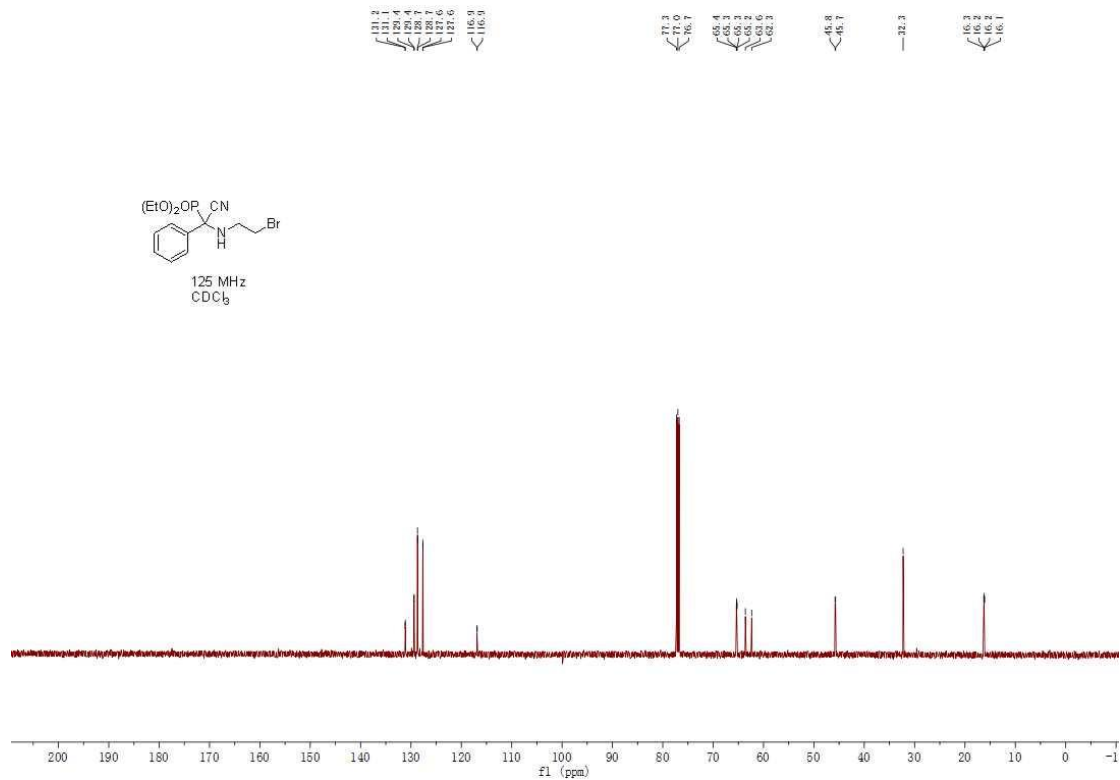



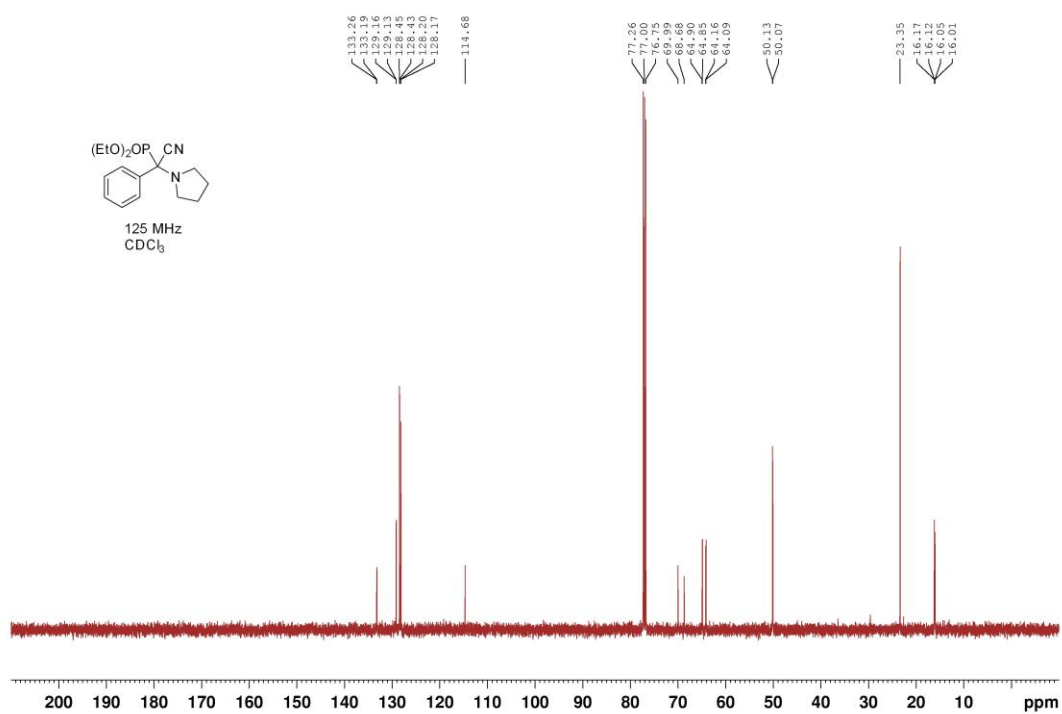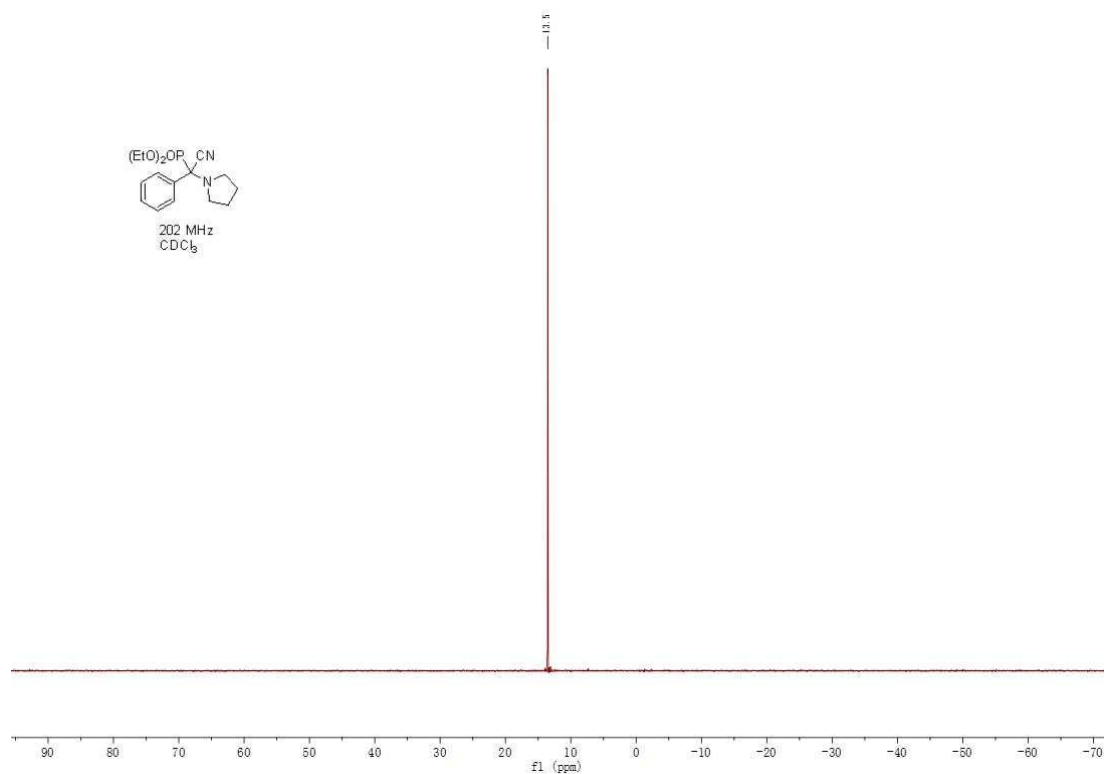

# Diethyl ((benzylamino)(cyano)(phenyl)methyl)phosphonate (1z)

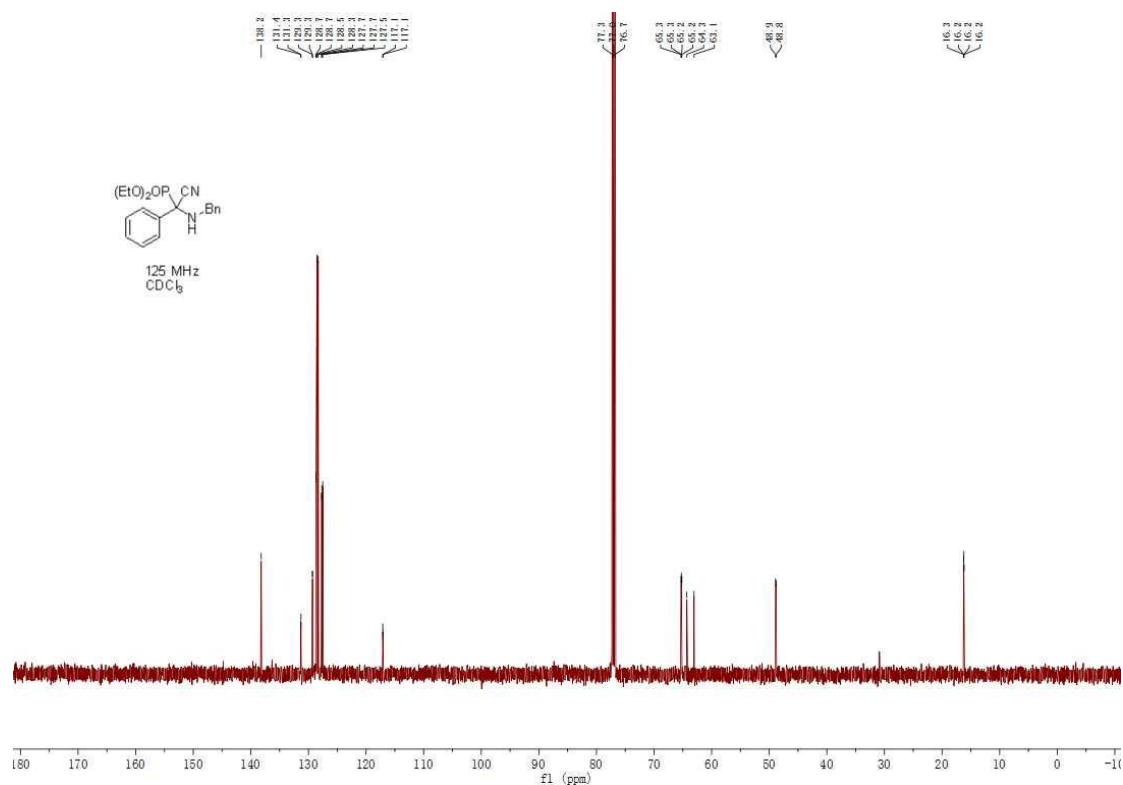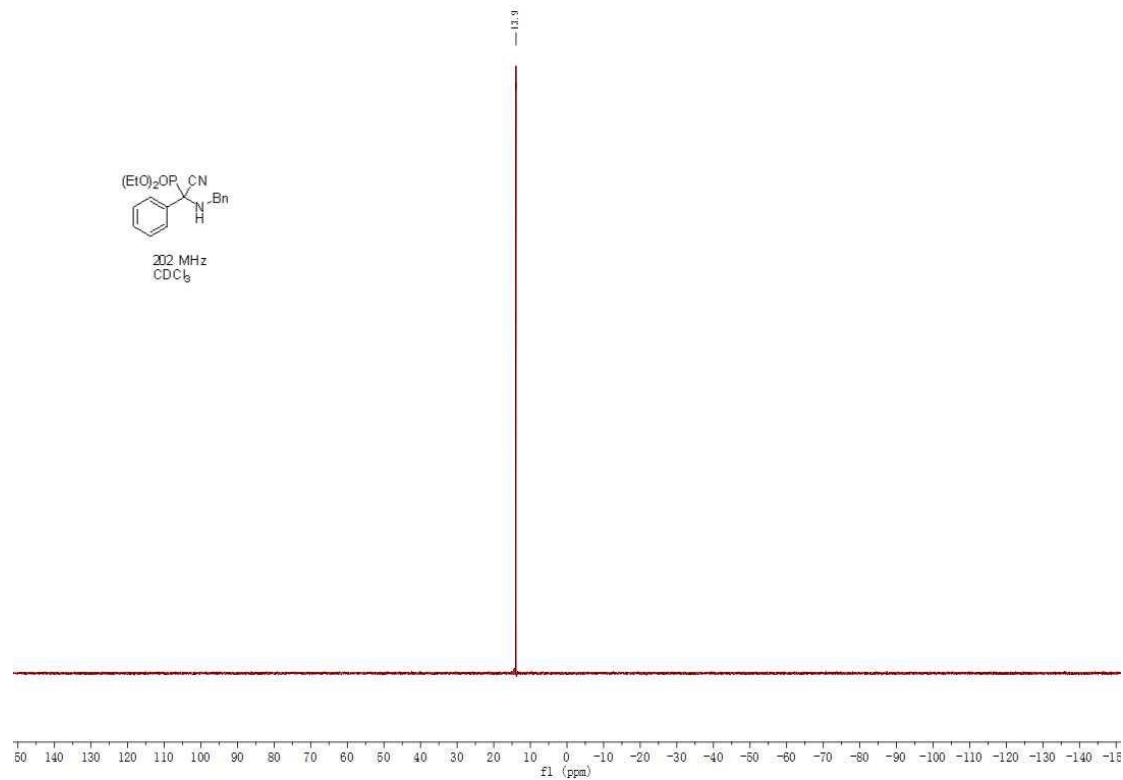

# Diethyl ((allylamino)(cyano)(phenyl)methyl)phosphonate (1aa)

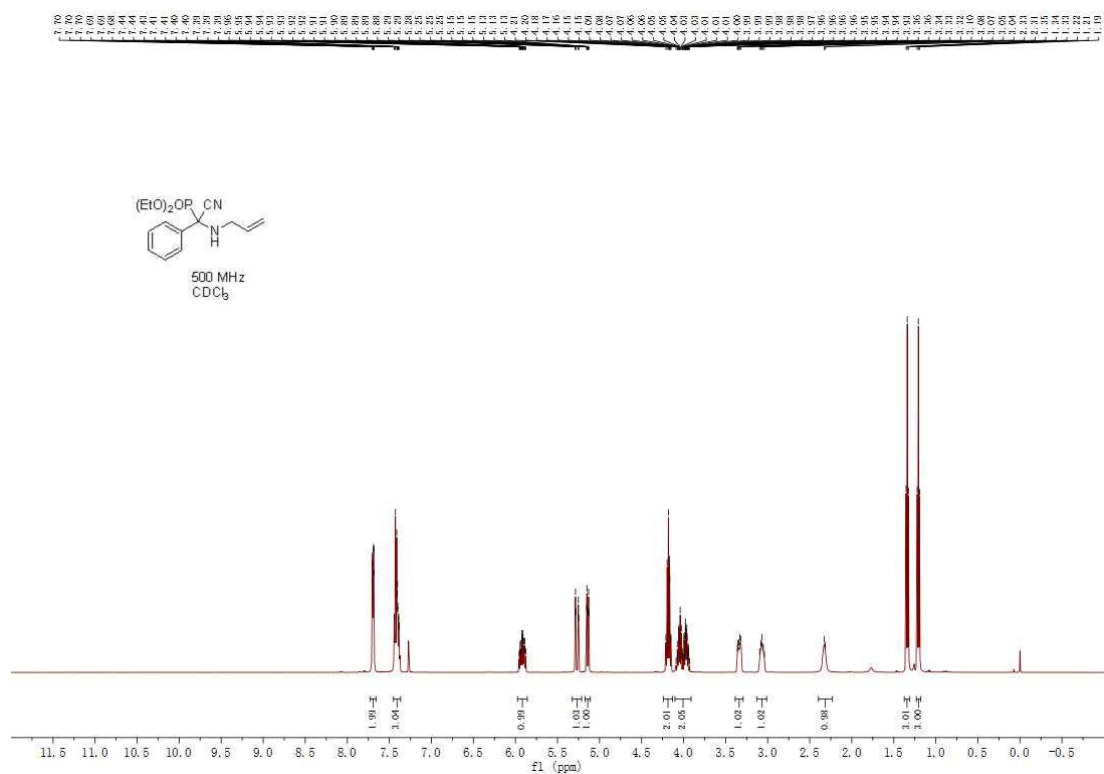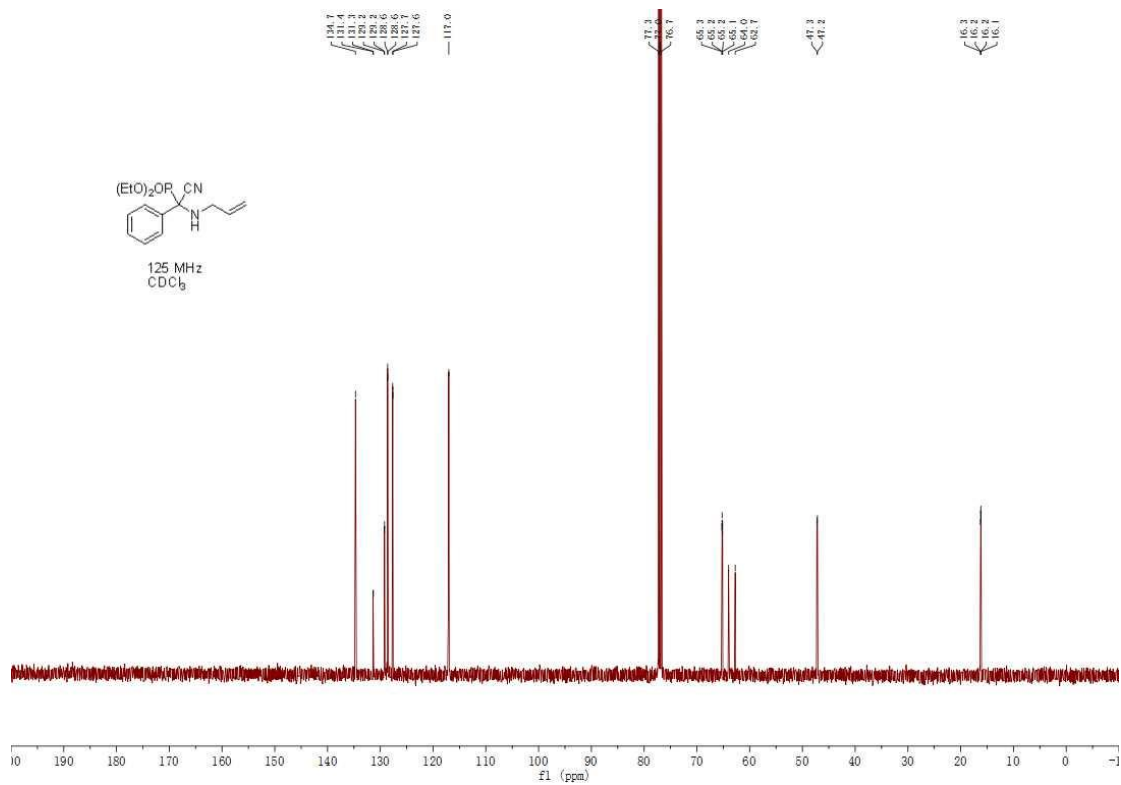



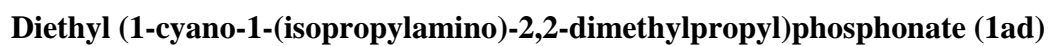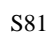

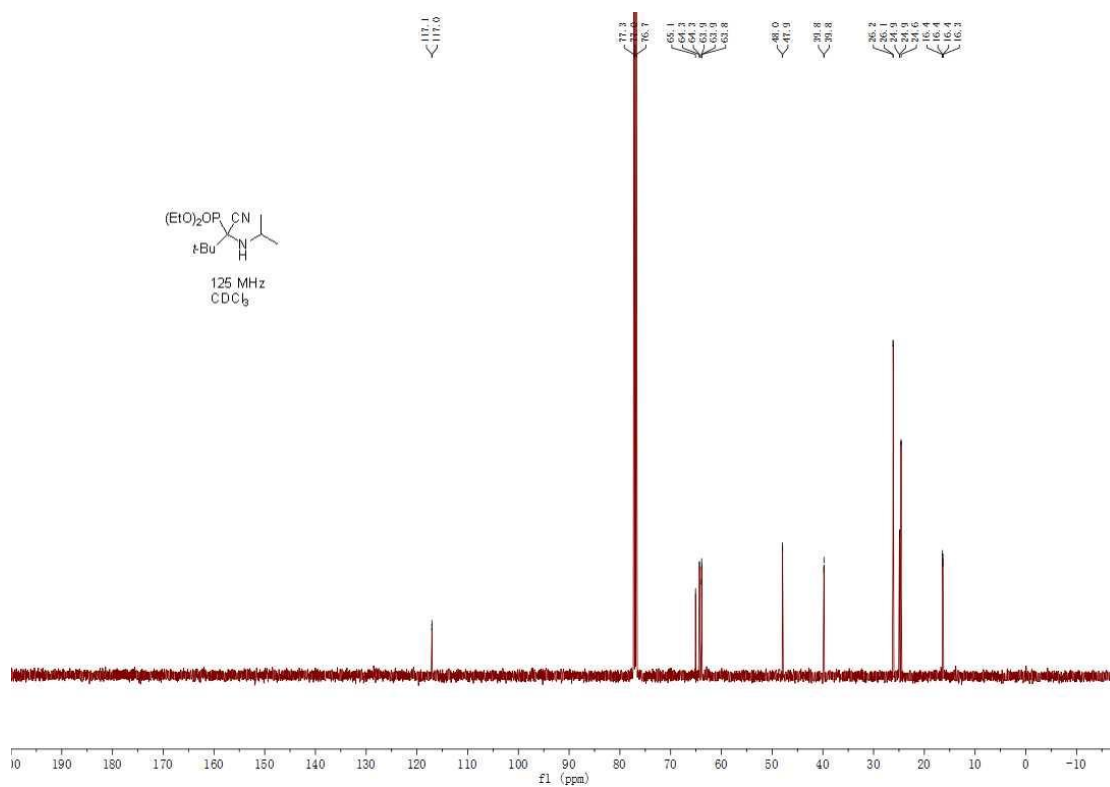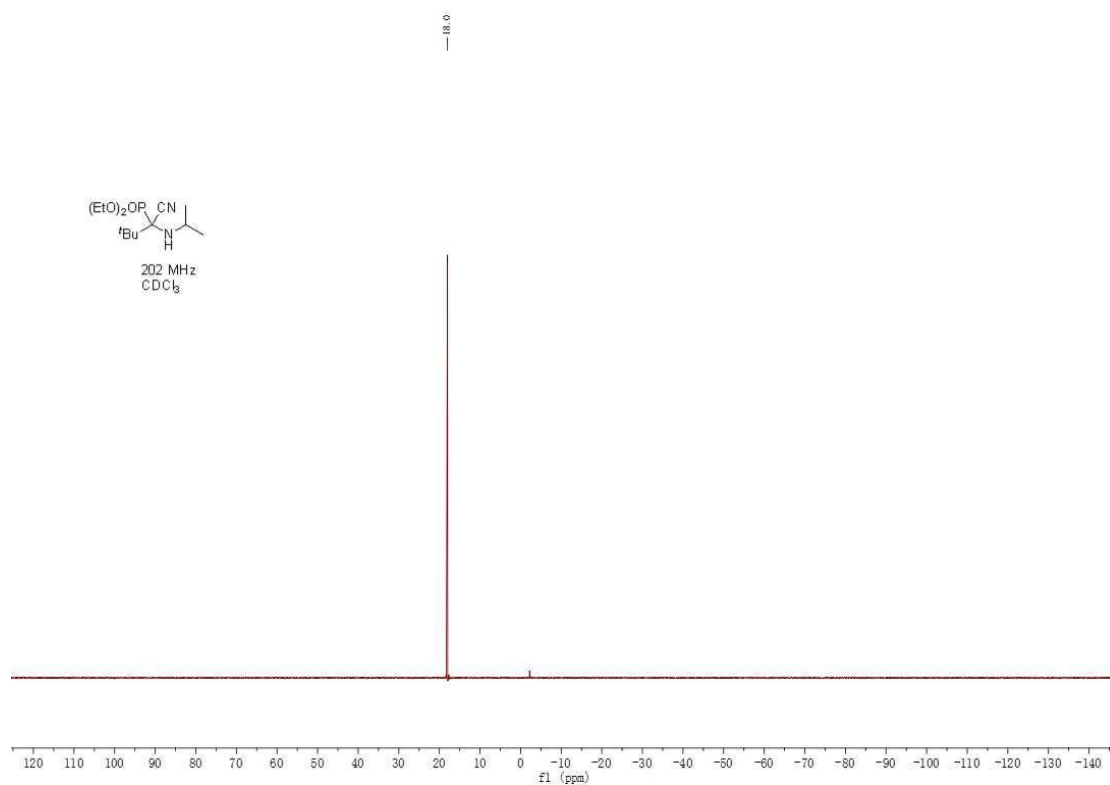

# Dimethyl (cyano(isopropylamino)(phenyl)methyl)phosphonate (1ae)

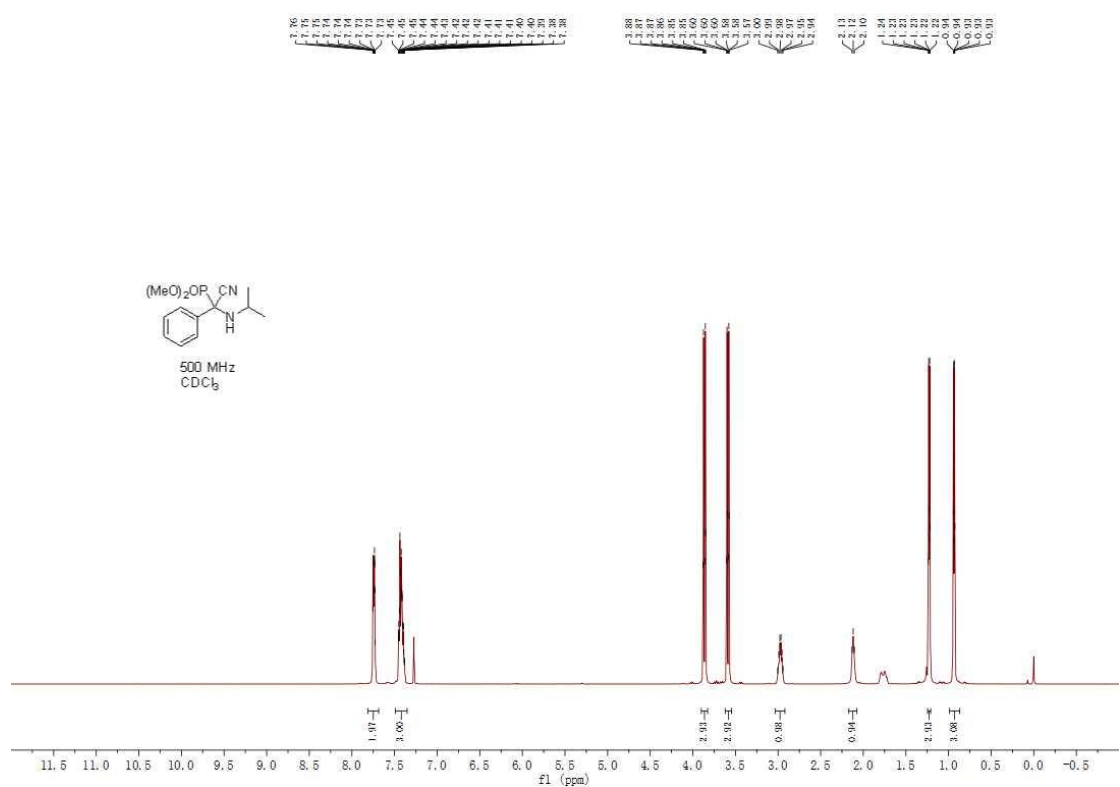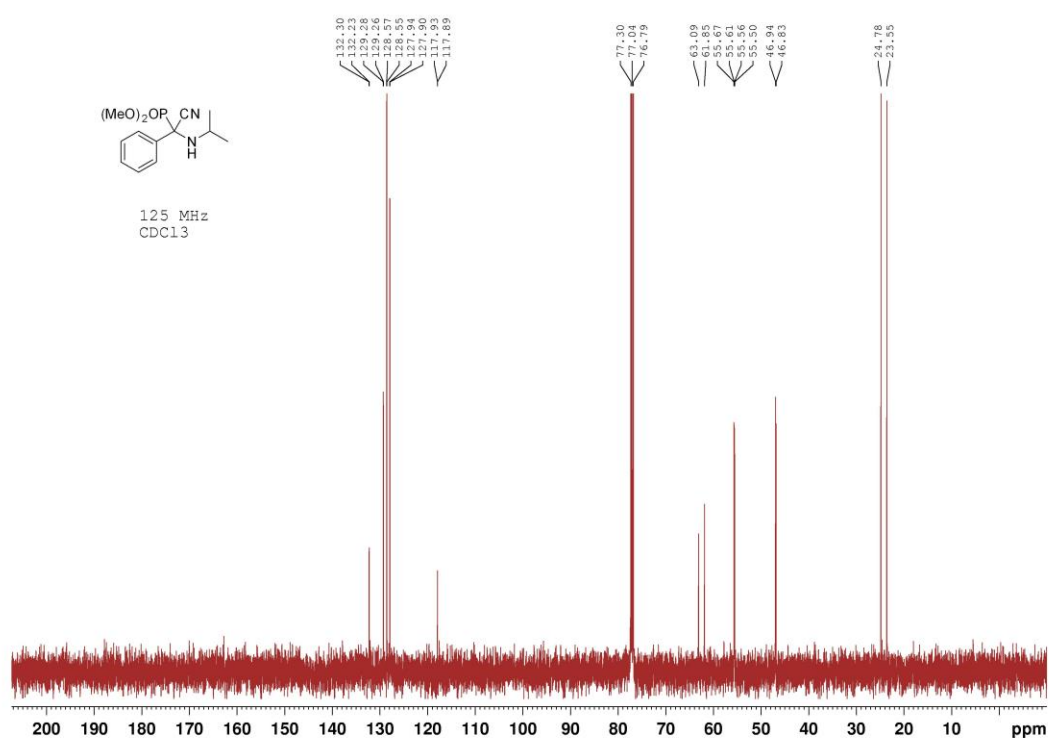

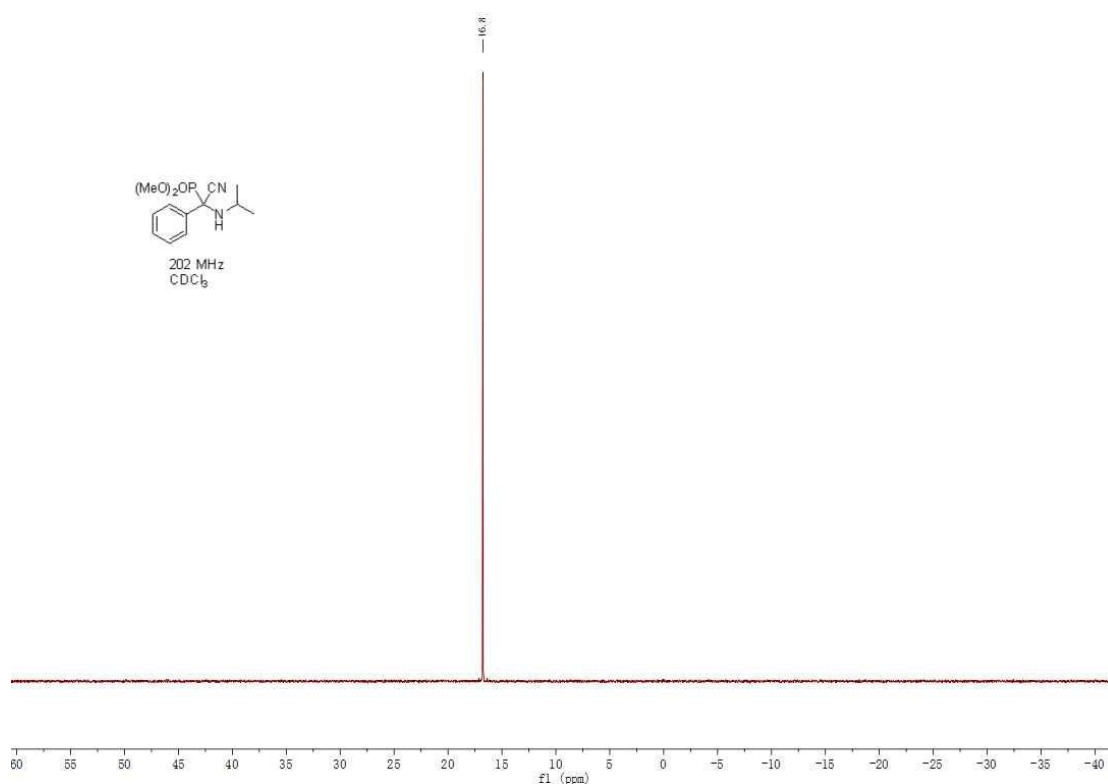

### Diisopropyl (cyano(isopropylamino)(phenyl)methyl)phosphonate (1af)

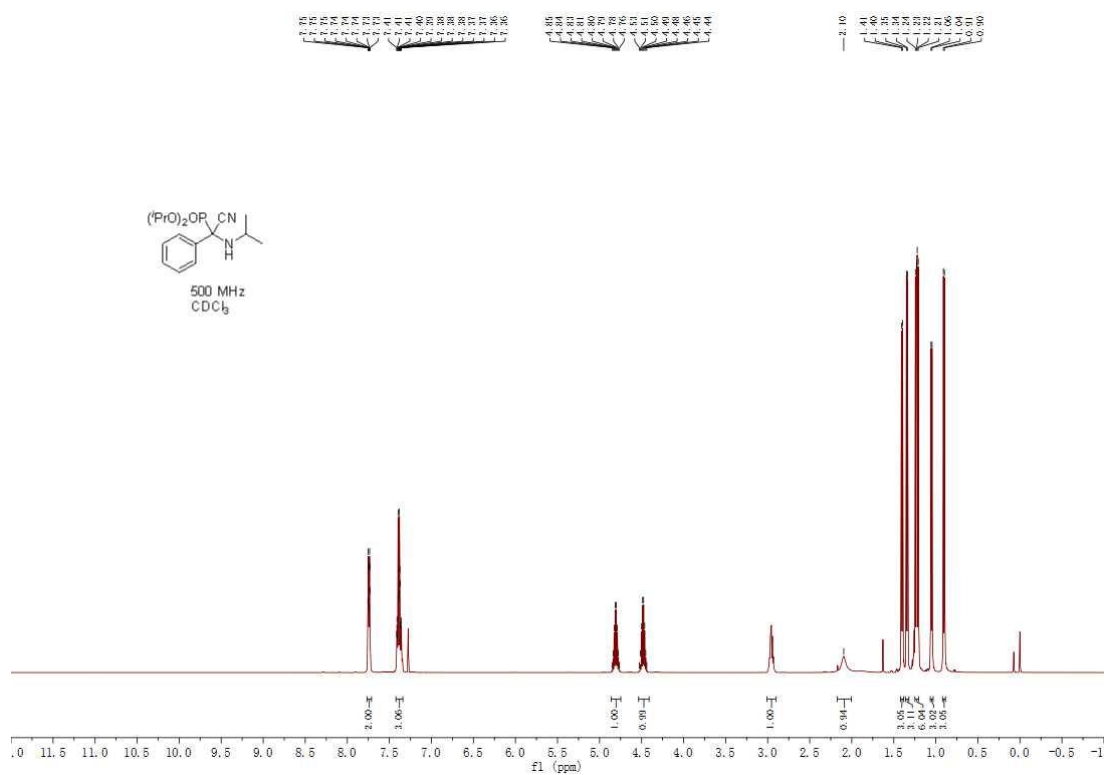

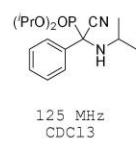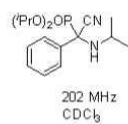

Supplement: Supplementary file 1 [file 15078032]
